# Supplementary material for: Diverse Synthesis of Fused Polyheterocyclic Compounds via [3 + 2] Cycloaddition of In Situ-Generated Heteroaromatic N-Ylides and Electron-Deficient Olefins
Source: MDPI journal article supplement (doi:10.3390/molecules28114410), 2023-05-29

# Supporting Information

## Diverse Synthesis of Fused Polyheterocyclic Compounds via [3 + 2] Cycloaddition of in Situ Generated Heteroaromatic *N*-Ylides and Electron-Deficient Olefins

Zhen-Hua Wang,<sup>\*,1</sup> Tong Zhang,<sup>1</sup> Li-Wen Shen,<sup>2</sup> Xiu Yang,<sup>1</sup> Yan-Ping Zhang,<sup>1</sup> Yong You,<sup>1</sup> Jian-Qiang Zhao,<sup>1</sup> and Wei-Cheng Yuan<sup>\*,1</sup>

---

<sup>1</sup>Innovation Research Center of Chiral Drugs, Institute for Advanced Study, Chengdu University, Chengdu 610106, China

<sup>2</sup>College of Chemistry and Chemical Engineering, Zunyi Normal College, Zunyi 563006, China

wangzhenhua@cdu.edu.cn

yuanwc@cioc.ac.cn

### Table of Contents

|                                                                                                                        |   |
|------------------------------------------------------------------------------------------------------------------------|---|
| 1. Optimization of the [3 + 2] cycloaddition reaction of benzothiazolium salt with other olefinic dipolarophiles ..... | 2 |
| 2. X-ray crystal structure of <b>3aa</b> .....                                                                         | 3 |
| 3. <sup>1</sup> H, <sup>13</sup> C NMR for compounds <b>3</b> , <b>5</b> , and <b>7</b> .....                          | 5 |

# 1. Optimization of the [3 + 2] cycloaddition reaction of benzothiazolium salt with other olefinic dipolarophiles

**Table S1** Optimization of reaction conditions for the [3 + 2] cycloaddition reaction between benzothiazolium salt and 3-trifluoroethylidene oxindole<sup>a</sup>

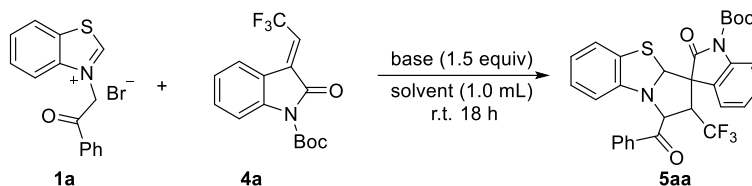

| entry | base                            | solvent | yield <sup>b</sup> |
|-------|---------------------------------|---------|--------------------|
| 1     | Cs <sub>2</sub> CO <sub>3</sub> | DCM     | 95                 |
| 2     | K <sub>3</sub> PO <sub>4</sub>  | DCM     | 51                 |
| 4     | DIPEA                           | DCM     | 85                 |
| 5     | TEA                             | DCM     | 69                 |
| 6     | Cs <sub>2</sub> CO <sub>3</sub> | Toluene | 84                 |
| 7     | Cs <sub>2</sub> CO <sub>3</sub> | DCE     | 88                 |
| 8     | Cs <sub>2</sub> CO <sub>3</sub> | MeCN    | 71                 |
| 9     | Cs <sub>2</sub> CO <sub>3</sub> | THF     | 86                 |

<sup>a</sup>The reaction was carried out with **1a** (0.15 mmol), **4a** (0.10 mmol), base (0.15 mmol) in solvent (1.0 mL) at room temperature for indicated time. <sup>b</sup>Isolated yield.

**Table S2** Optimization of reaction conditions for the [3 + 2] cycloaddition reaction of benzothiazolium salt with benzylidenemalononitrile<sup>a</sup>

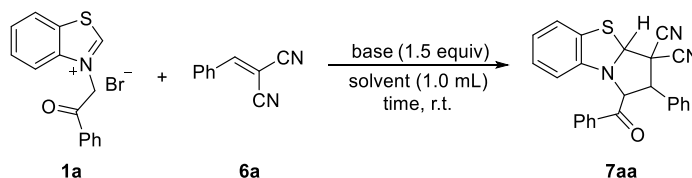

| entry | base                            | solvent           | time (h) | yield (%) <sup>b</sup> |
|-------|---------------------------------|-------------------|----------|------------------------|
| 1     | Cs <sub>2</sub> CO <sub>3</sub> | THF               | 3        | 45                     |
| 2     | Cs <sub>2</sub> CO <sub>3</sub> | MeCN              | 2        | 43                     |
| 3     | Cs <sub>2</sub> CO <sub>3</sub> | toluene           | 24       | 12                     |
| 4     | Cs <sub>2</sub> CO <sub>3</sub> | EtOH              | 24       | n.d.                   |
| 5     | Cs <sub>2</sub> CO <sub>3</sub> | CHCl <sub>3</sub> | 3        | 9                      |
| 6     | Cs <sub>2</sub> CO <sub>3</sub> | 2-MeTHF           | 24       | 25                     |
| 7     | Cs <sub>2</sub> CO <sub>3</sub> | 1,4-dioxane       | 3        | 46                     |
| 8     | Cs <sub>2</sub> CO <sub>3</sub> | DME               | 3        | 51                     |
| 9     | Cs <sub>2</sub> CO <sub>3</sub> | MTBE              | 3        | 32                     |
| 10    | K <sub>3</sub> PO <sub>4</sub>  | DME               | 3        | 44                     |
| 11    | K <sub>2</sub> CO <sub>3</sub>  | DME               | 3        | 94                     |
| 12    | Na <sub>2</sub> CO <sub>3</sub> | DME               | 3        | 93                     |
| 13    | Li <sub>2</sub> CO <sub>3</sub> | DME               | 3        | n.d.                   |

|                 |                    |     |   |    |
|-----------------|--------------------|-----|---|----|
| 14              | NaHCO <sub>3</sub> | DME | 3 | 72 |
| 15              | NaOH               | DME | 3 | 25 |
| 16              | DIPEA              | DME | 3 | 71 |
| 17              | TEA                | DME | 3 | 95 |
| 18 <sup>c</sup> | TEA                | DME | 3 | 72 |

<sup>a</sup> The reaction was carried out with **1a** (0.15 mmol), **6a** (0.10 mmol), base (0.15 mmol) in solvent (1.0 mL) at room temperature for indicated time. <sup>b</sup> Isolated yield. <sup>c</sup> 2.0 mL 1,2-dimethoxyethane (DME) was used.

## 2. X-ray crystal structure of **3aa**

Single crystals of compound **3aa** were prepared through dissolving the sample in mixture solvent of EtOH at room temperature and crystallizing by slow evaporation of solvent. A suitable crystal was selected for structure determination on an 'Oxford Gemini E' diffractometer. The crystal was kept at 293 K during data collection. Using Olex2<sup>1</sup>, the structure was solved with the ShelXT<sup>2</sup> structure solution program using Intrinsic Phasing and refined with the ShelXL<sup>3</sup> refinement package using Least Squares minimisation.

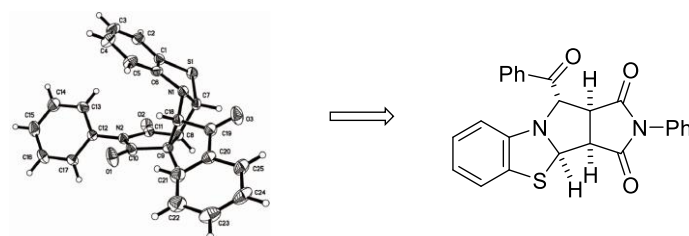

**3aa** (CCDC 2193494)

ORTEP of **3aa** (at the 50% probability level)

| Identification code                | <b>3aa</b>                                                      |
|------------------------------------|-----------------------------------------------------------------|
| Empirical formula                  | C <sub>25</sub> H <sub>18</sub> N <sub>2</sub> O <sub>3</sub> S |
| Formula weight                     | 426.47                                                          |
| Temperature/K                      | 293(2)                                                          |
| Crystal system                     | monoclinic                                                      |
| Space group                        | P2 <sub>1</sub> /c                                              |
| a/Å                                | 10.4876(6)                                                      |
| b/Å                                | 8.2188(4)                                                       |
| c/Å                                | 23.8232(9)                                                      |
| α/°                                | 90                                                              |
| β/°                                | 101.322(4)                                                      |
| γ/°                                | 90                                                              |
| Volume/Å <sup>3</sup>              | 2013.49(18)                                                     |
| Z                                  | 4                                                               |
| ρ <sub>calc</sub> /cm <sup>3</sup> | 1.407                                                           |
| μ/mm <sup>-1</sup>                 | 1.686                                                           |

|                                                  |                                                                      |
|--------------------------------------------------|----------------------------------------------------------------------|
| F(000)                                           | 888.0                                                                |
| Crystal size/mm <sup>3</sup>                     | 0.12 × 0.1 × 0.09                                                    |
| Radiation                                        | CuK $\alpha$ ( $\lambda$ = 1.54184)                                  |
| 2 $\Theta$ range for data collection/ $^{\circ}$ | 7.57 to 134.16                                                       |
| Index ranges                                     | -12 $\leq$ h $\leq$ 10, -9 $\leq$ k $\leq$ 6, -26 $\leq$ l $\leq$ 28 |
| Reflections collected                            | 7242                                                                 |
| Independent reflections                          | 3593 [ $R_{\text{int}}$ = 0.0337, $R_{\text{sigma}}$ = 0.0476]       |
| Data/restraints/parameters                       | 3593/0/280                                                           |
| Goodness-of-fit on $F^2$                         | 1.033                                                                |
| Final R indexes [ $I \geq 2\sigma(I)$ ]          | $R_1$ = 0.0477, $wR_2$ = 0.1282                                      |
| Final R indexes [all data]                       | $R_1$ = 0.0600, $wR_2$ = 0.1426                                      |
| Largest diff. peak/hole / e $\text{\AA}^{-3}$    | 0.23/-0.28                                                           |

---

1. Dolomanov, O. V.; Bourhis, L. J.; Gildea, R. J, Howard, J. A. K; Puschmann, H. *J. Appl. Cryst.*, **2009**, *42*, 339-341.
2. Sheldrick, G. M. *Acta Cryst.* **2015**, A71, 3-8.
3. Sheldrick, G. M. *Acta Cryst.* **2015**, C71, 3-8.



3.  $^1\text{H}$ ,  $^{13}\text{C}$  NMR for compounds 3, 5, and 7

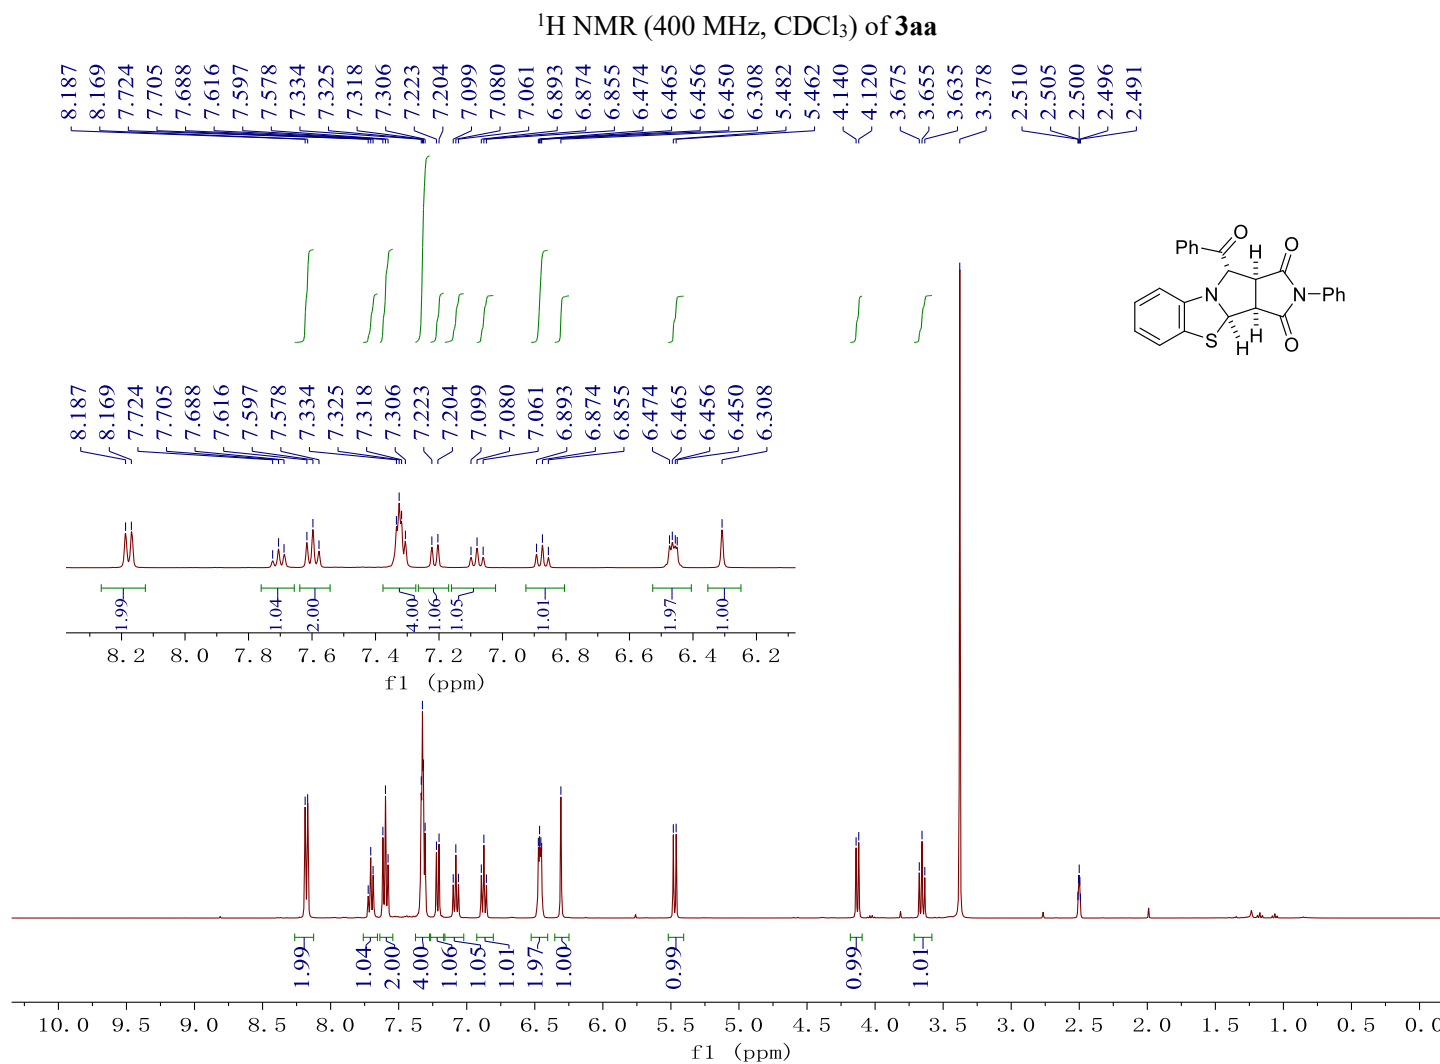

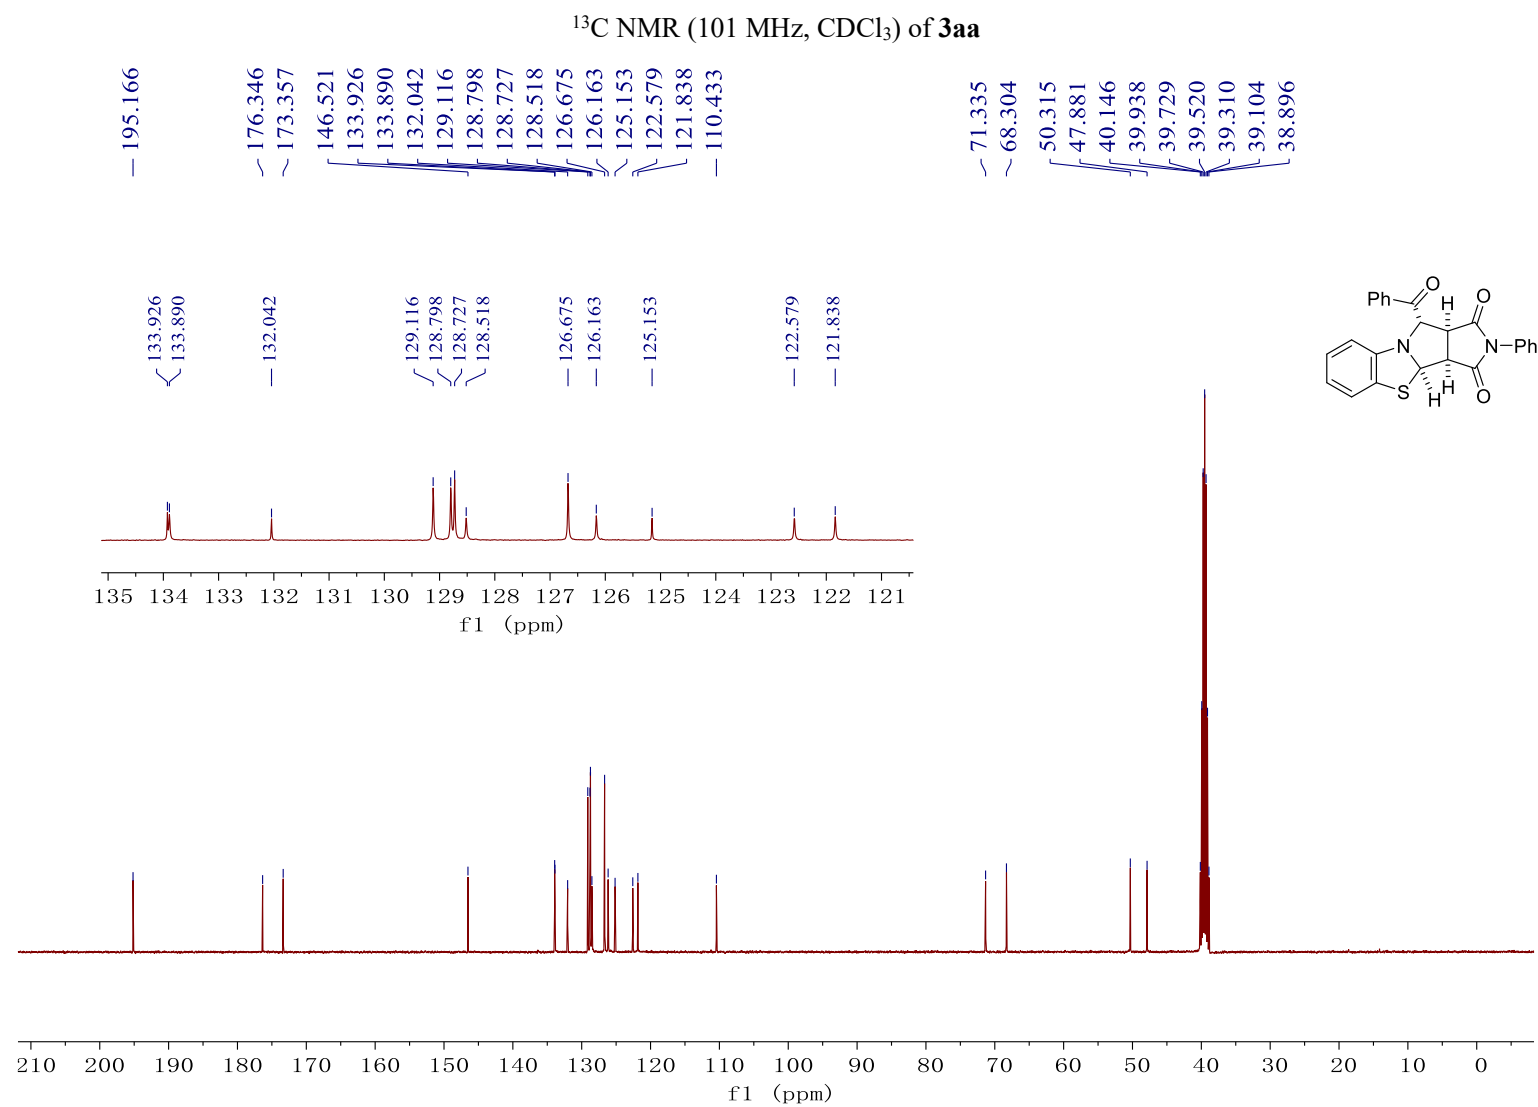

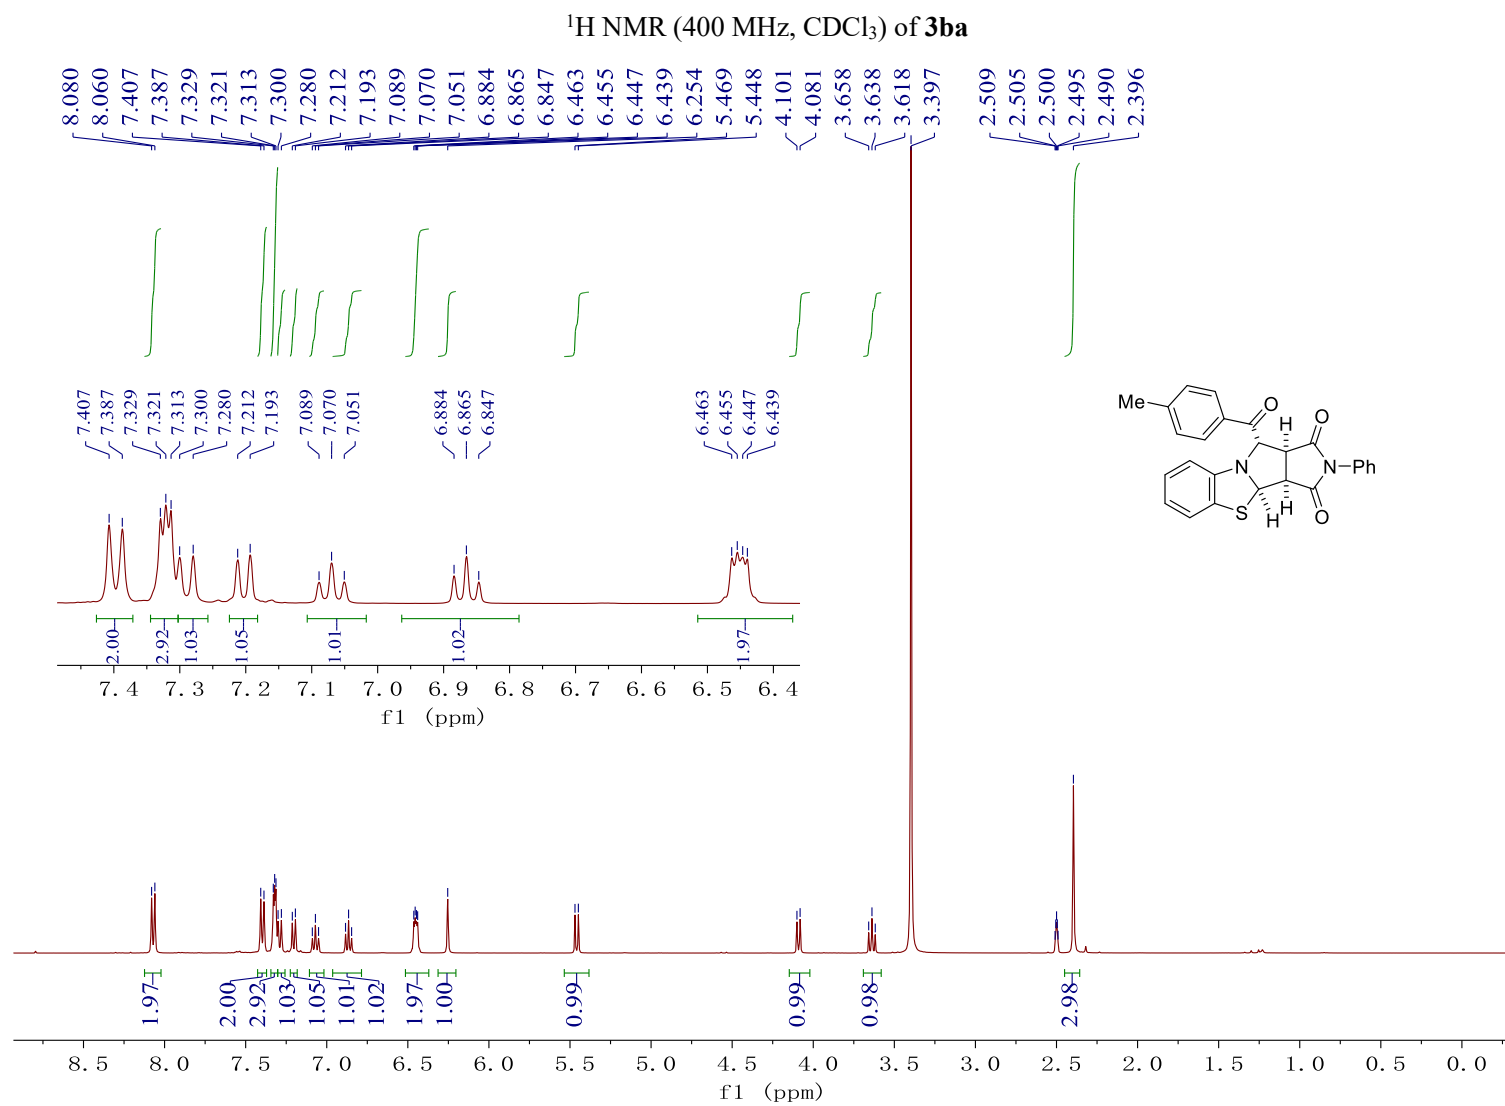

<sup>13</sup>C NMR (101 MHz, CDCl<sub>3</sub>) of **3ba**

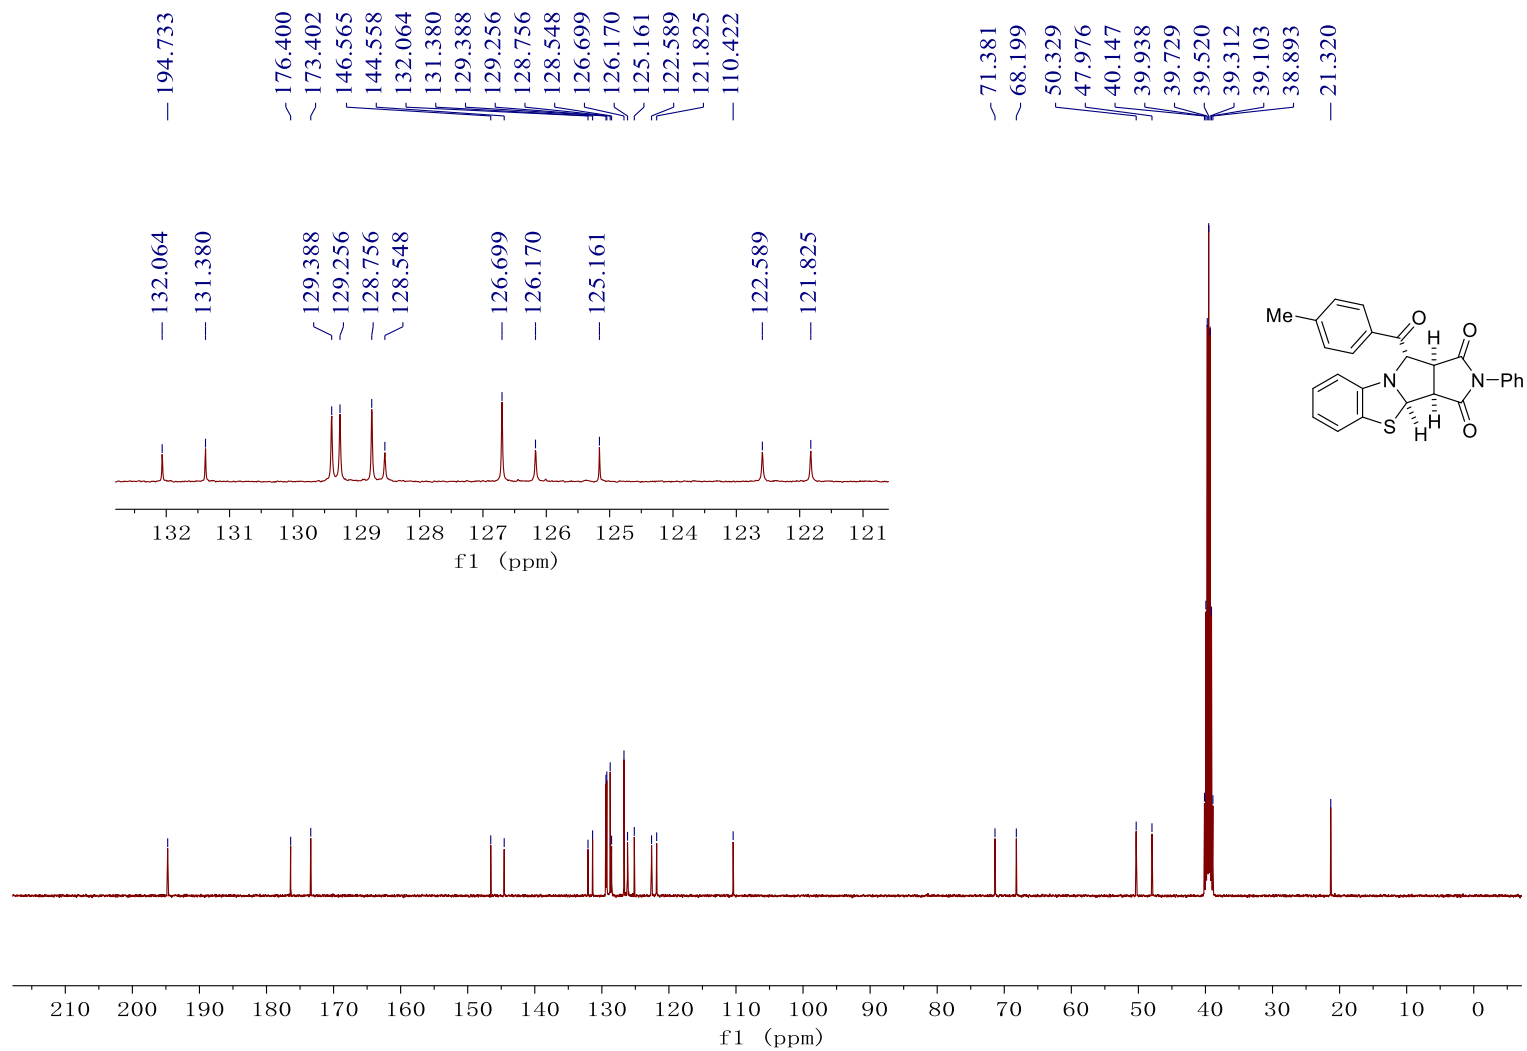

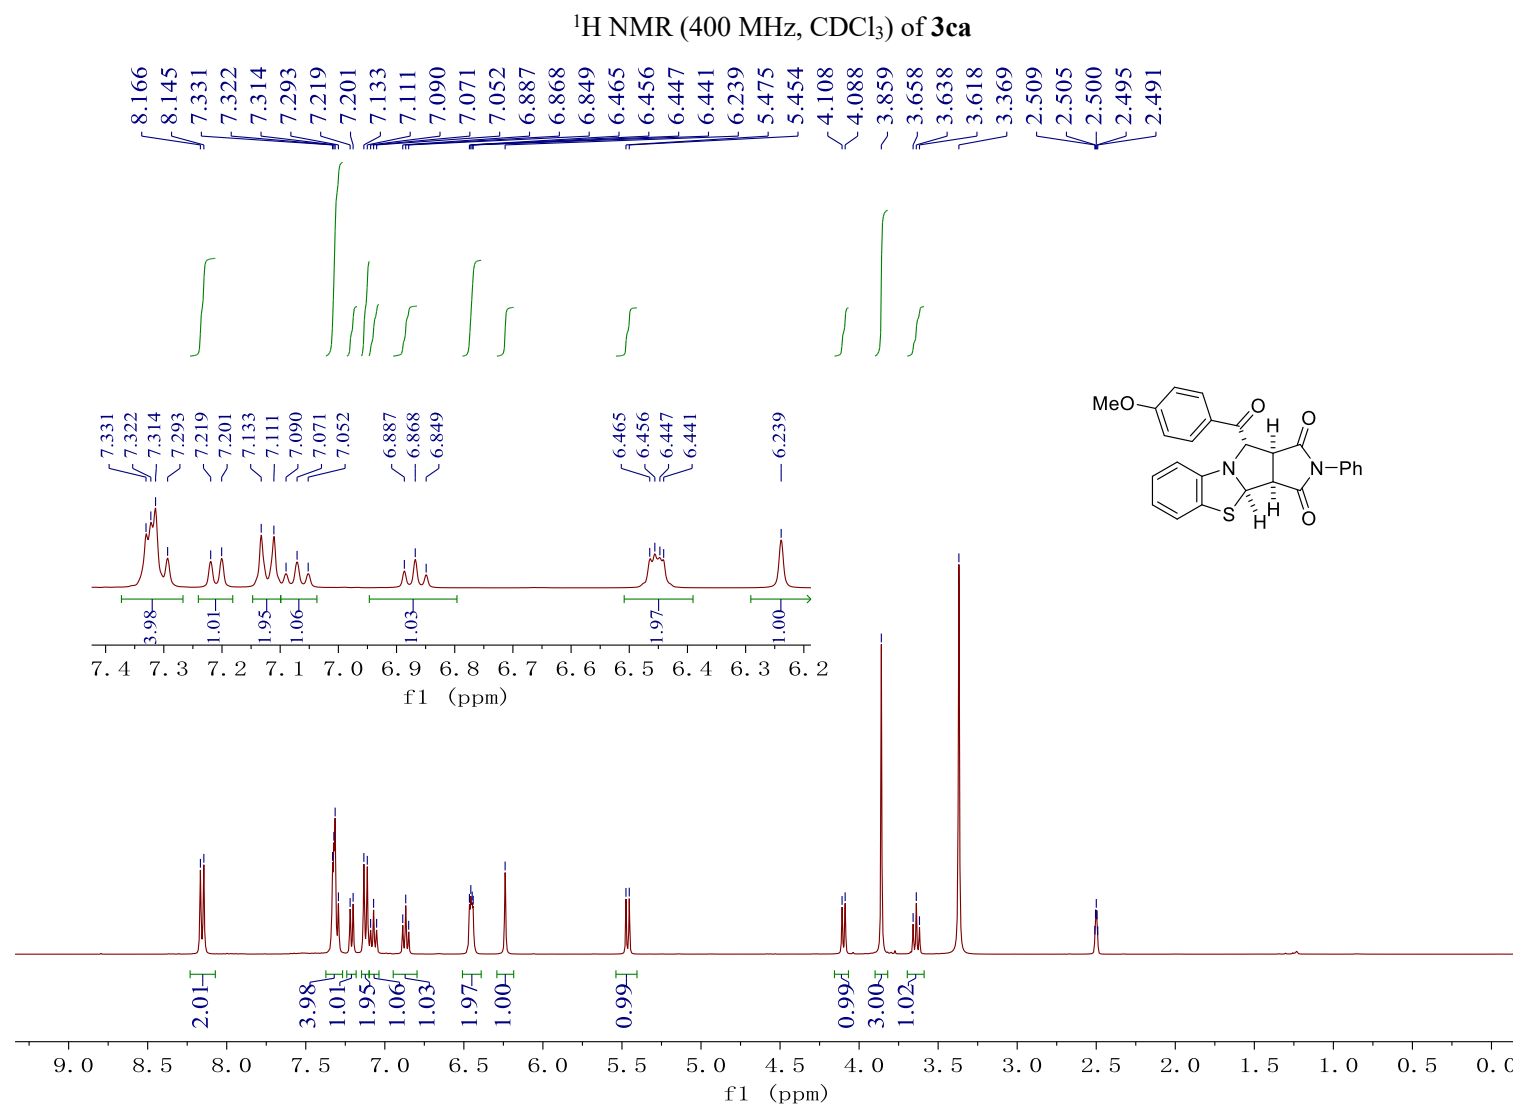

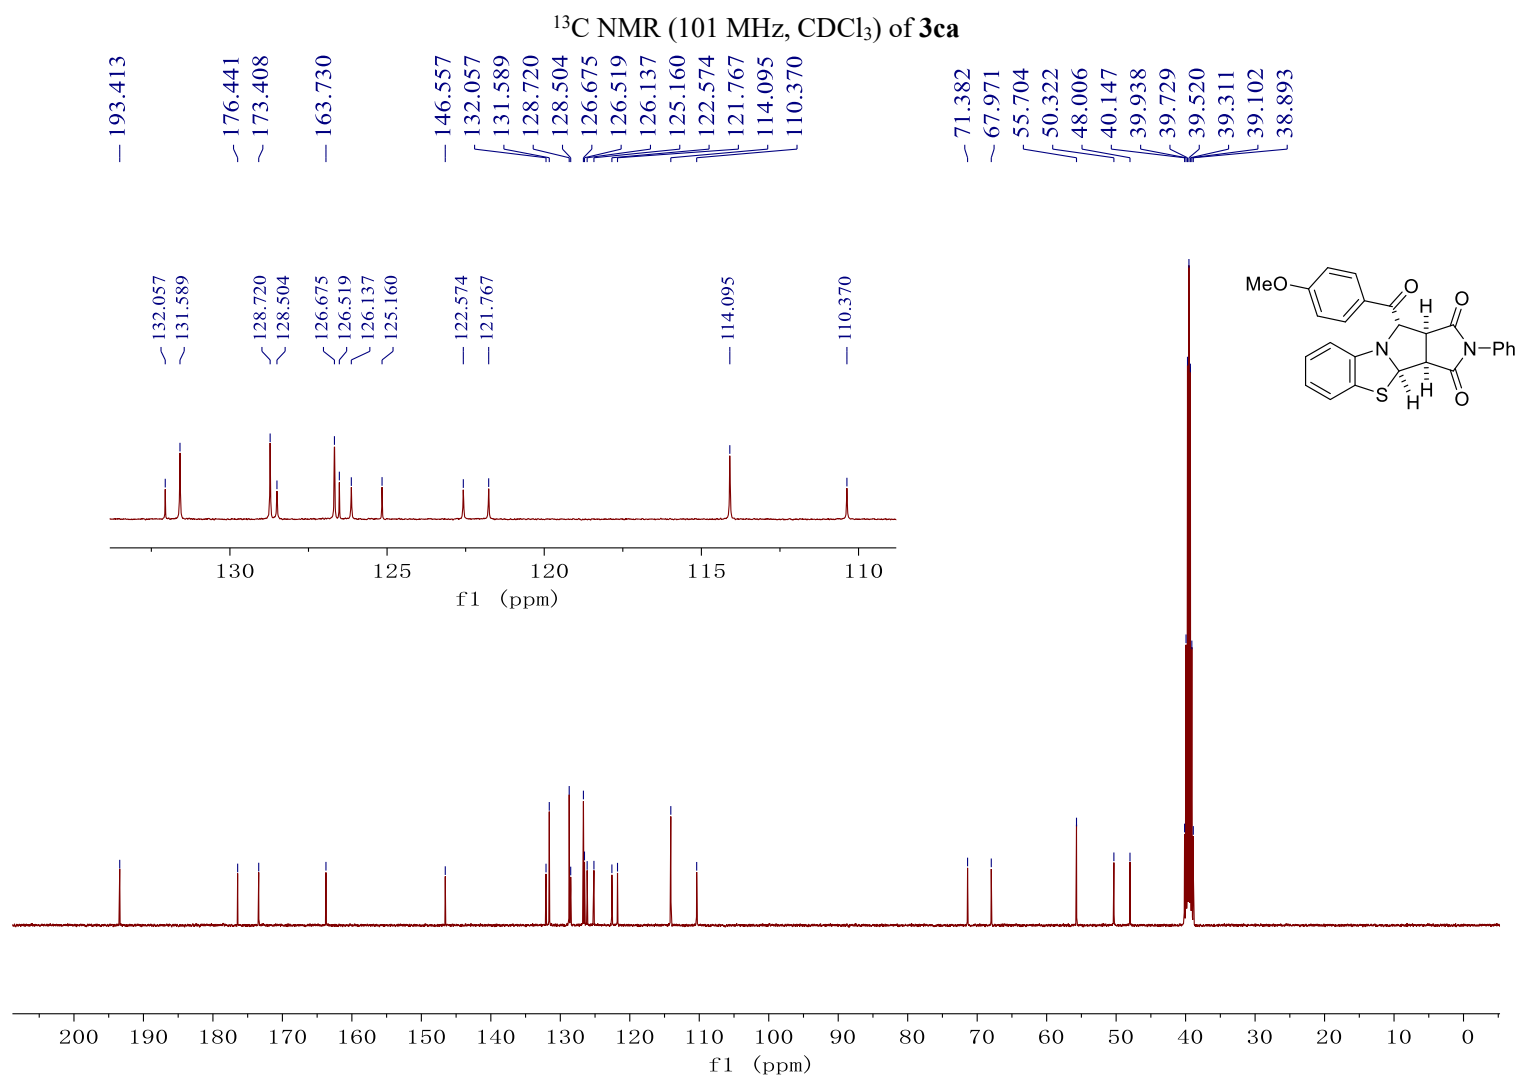

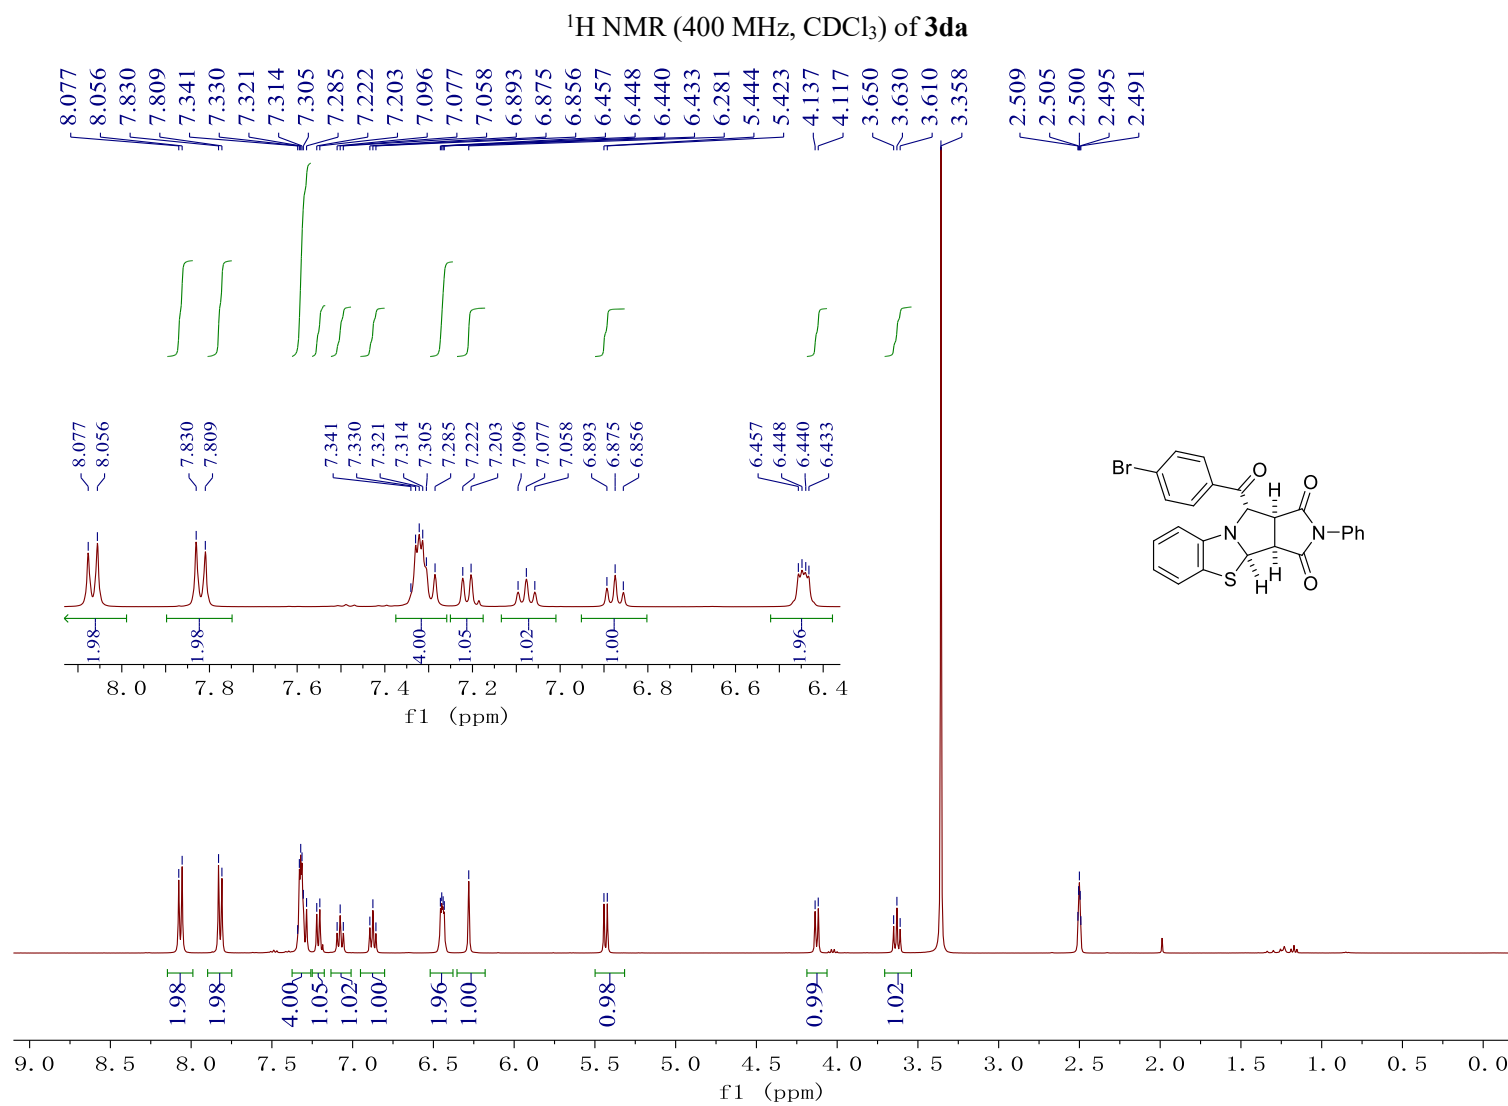

<sup>13</sup>C NMR (101 MHz, CDCl<sub>3</sub>) of **3da**

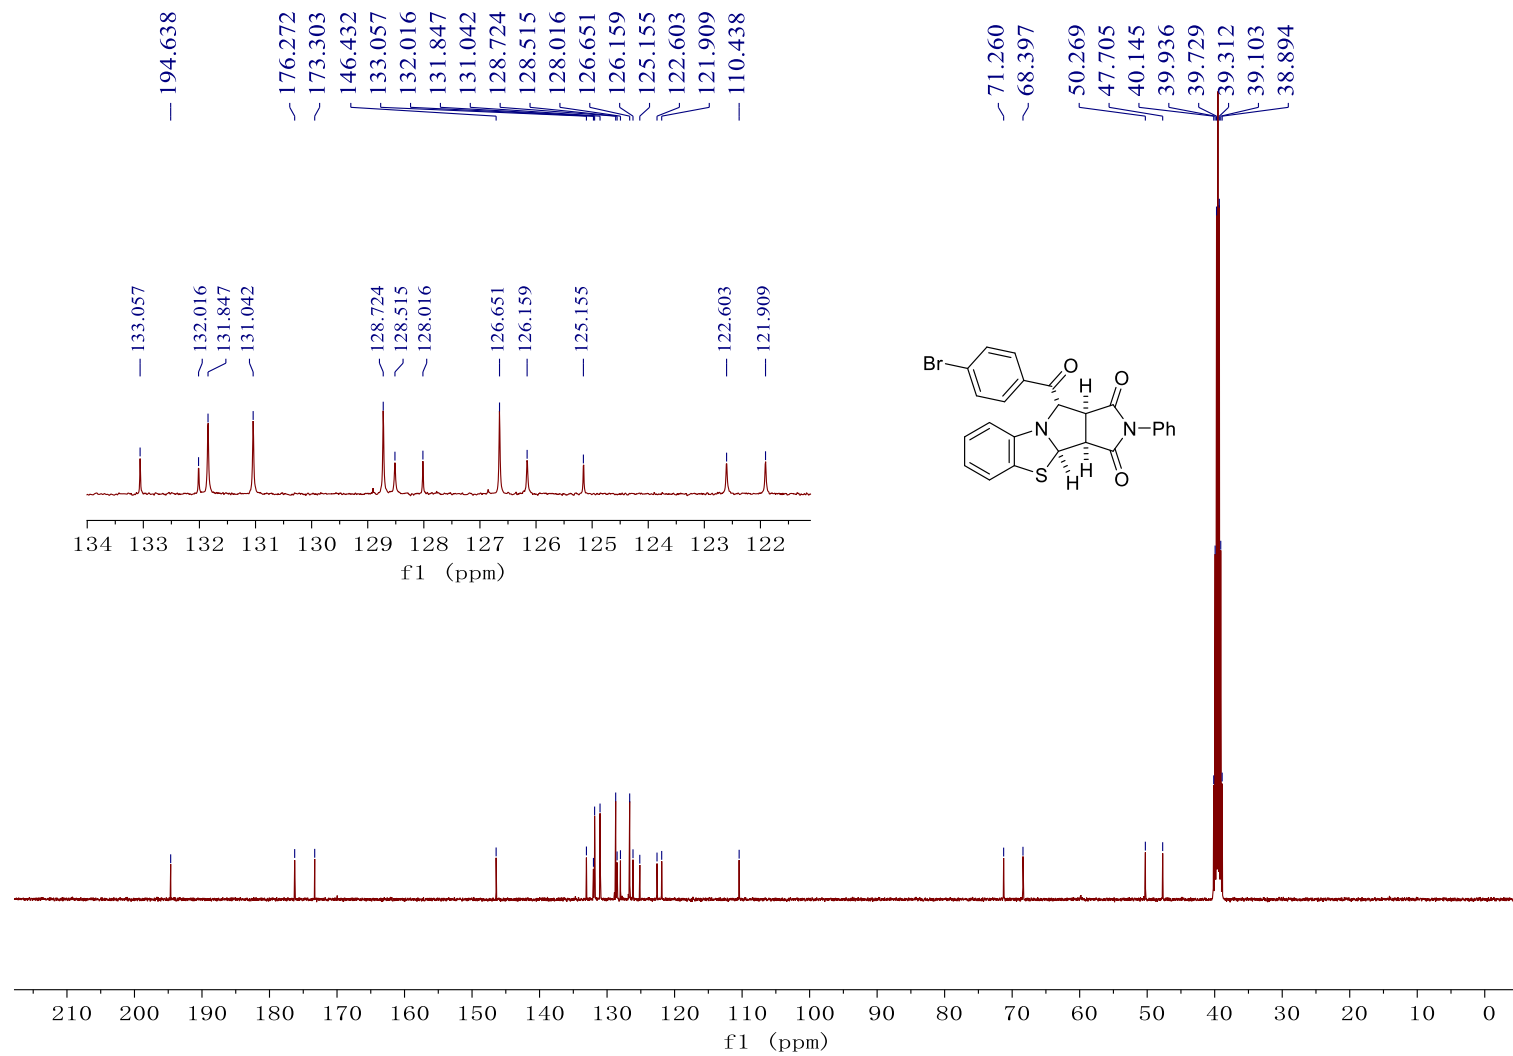



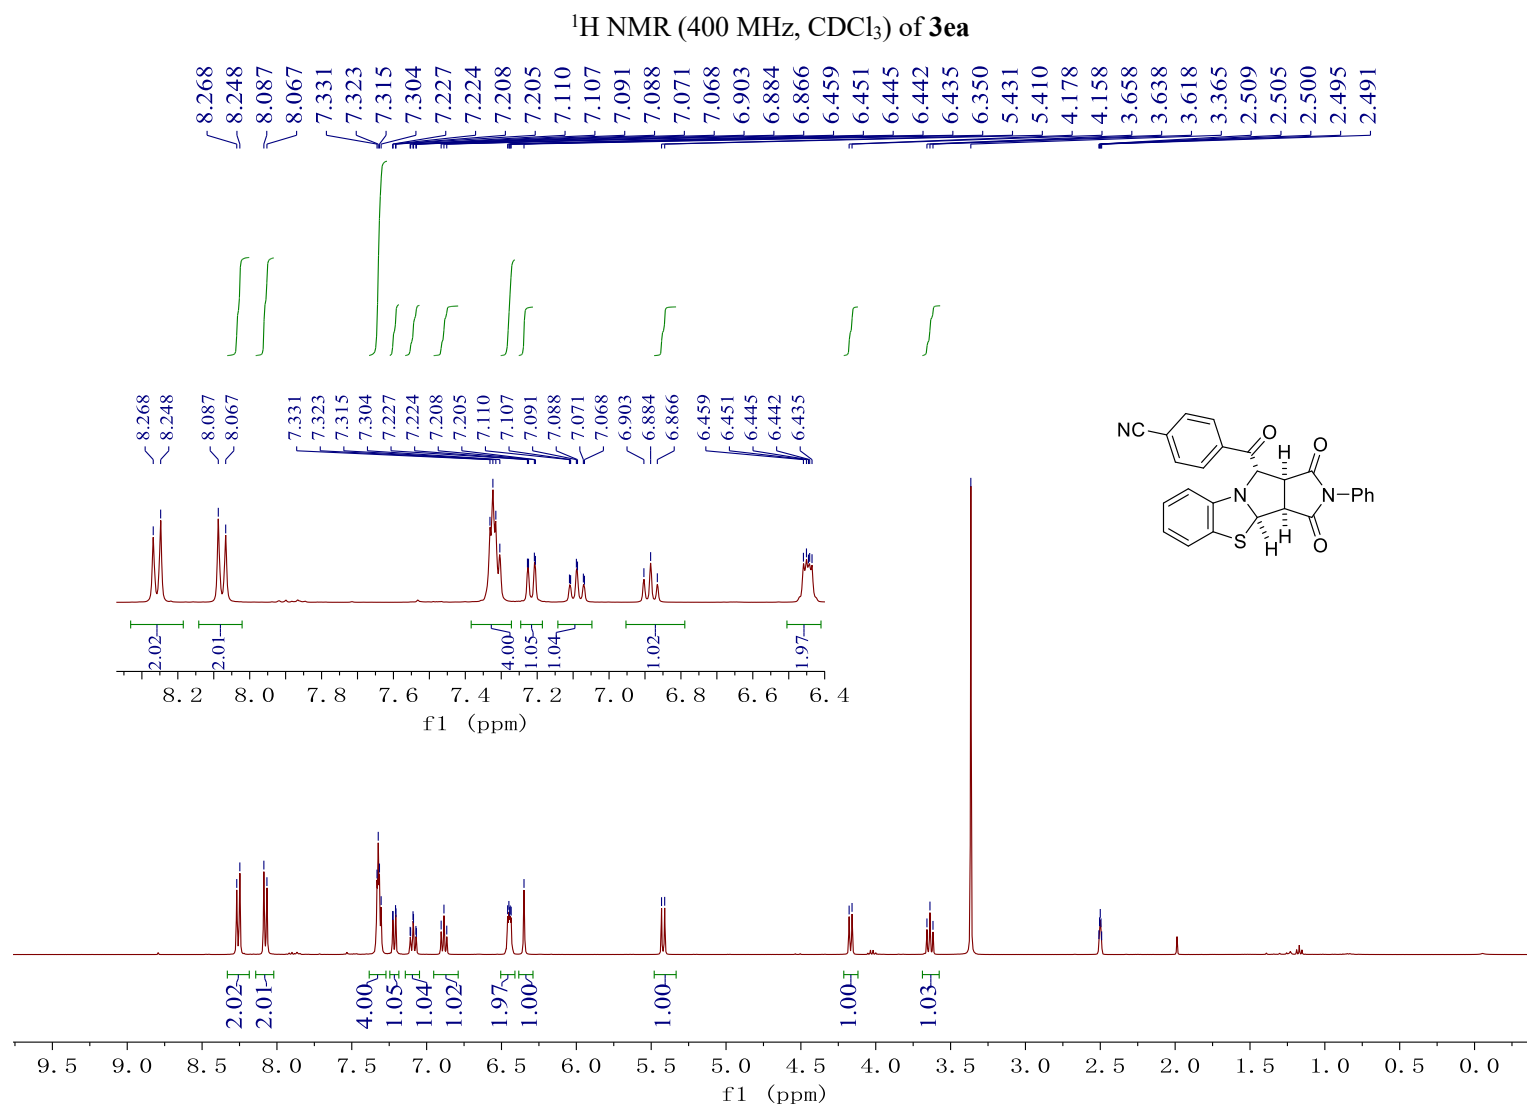

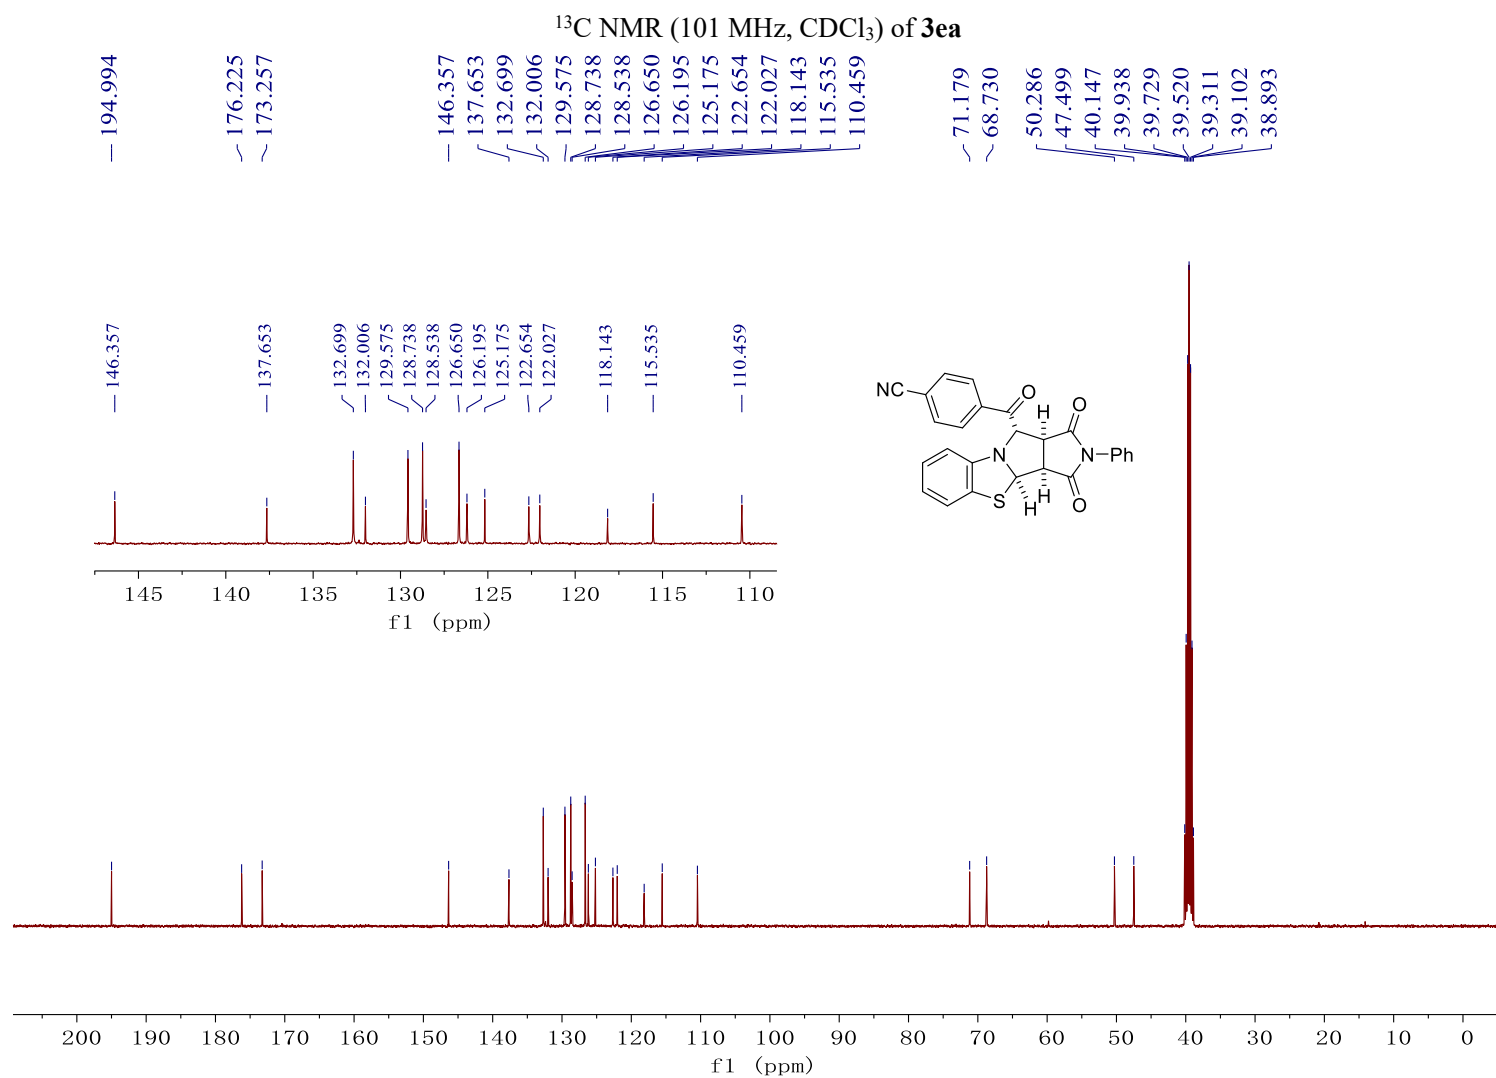

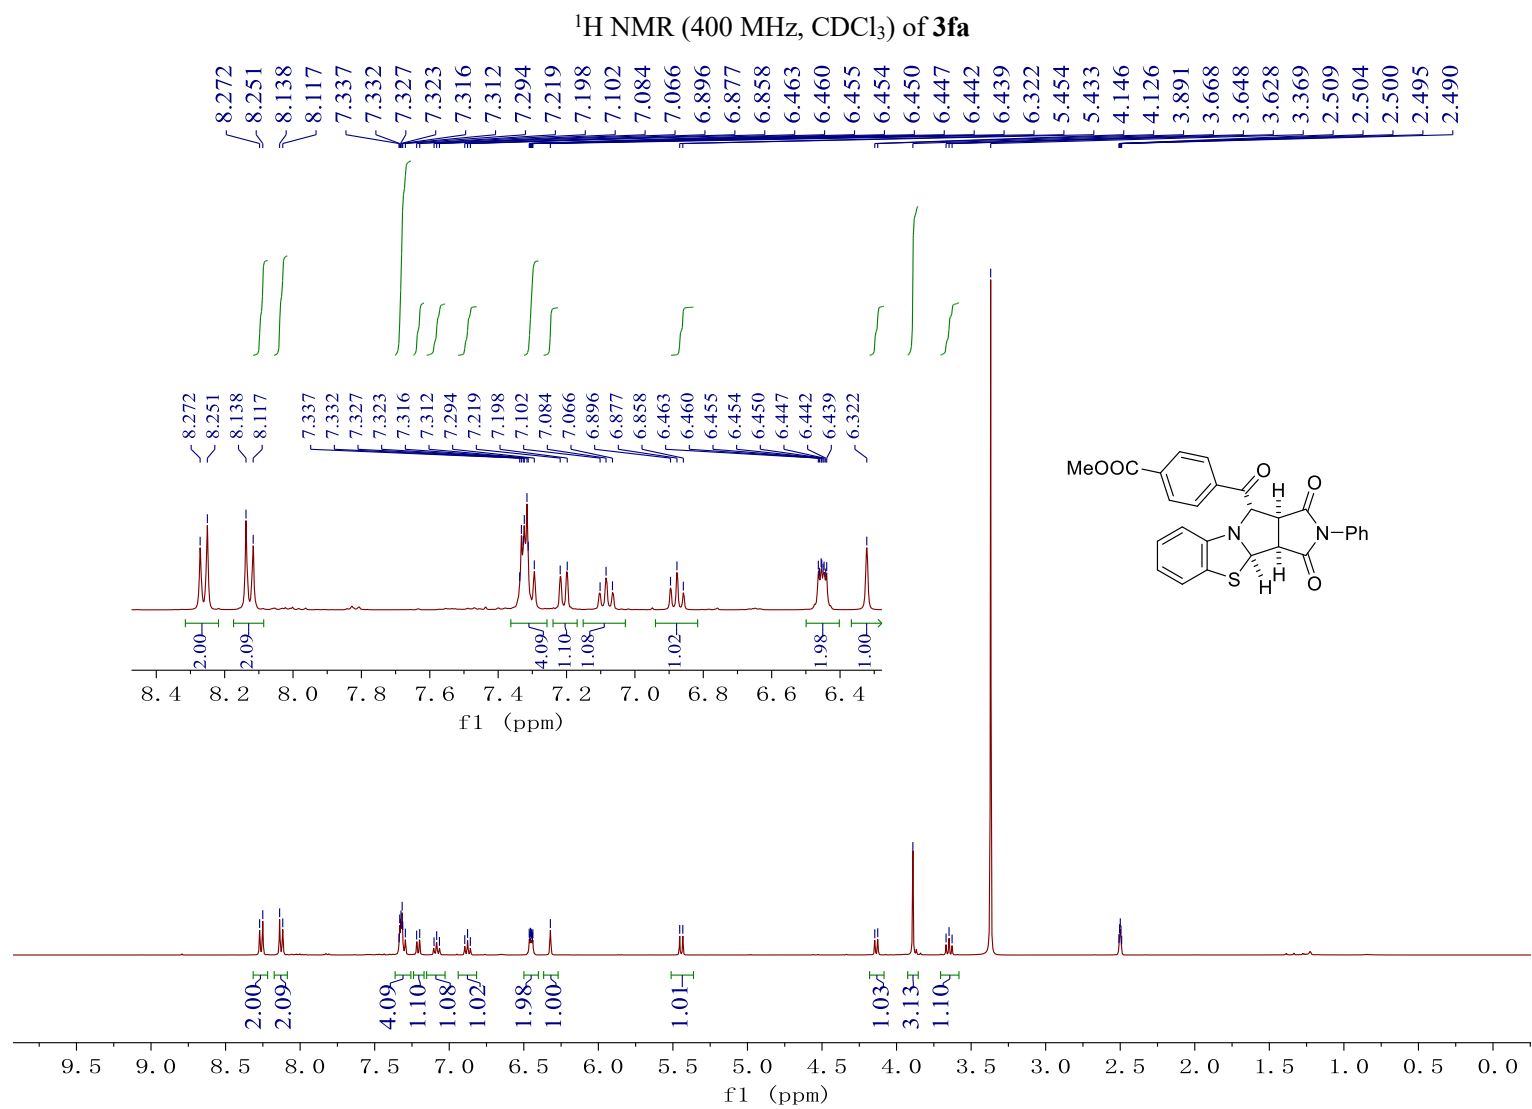

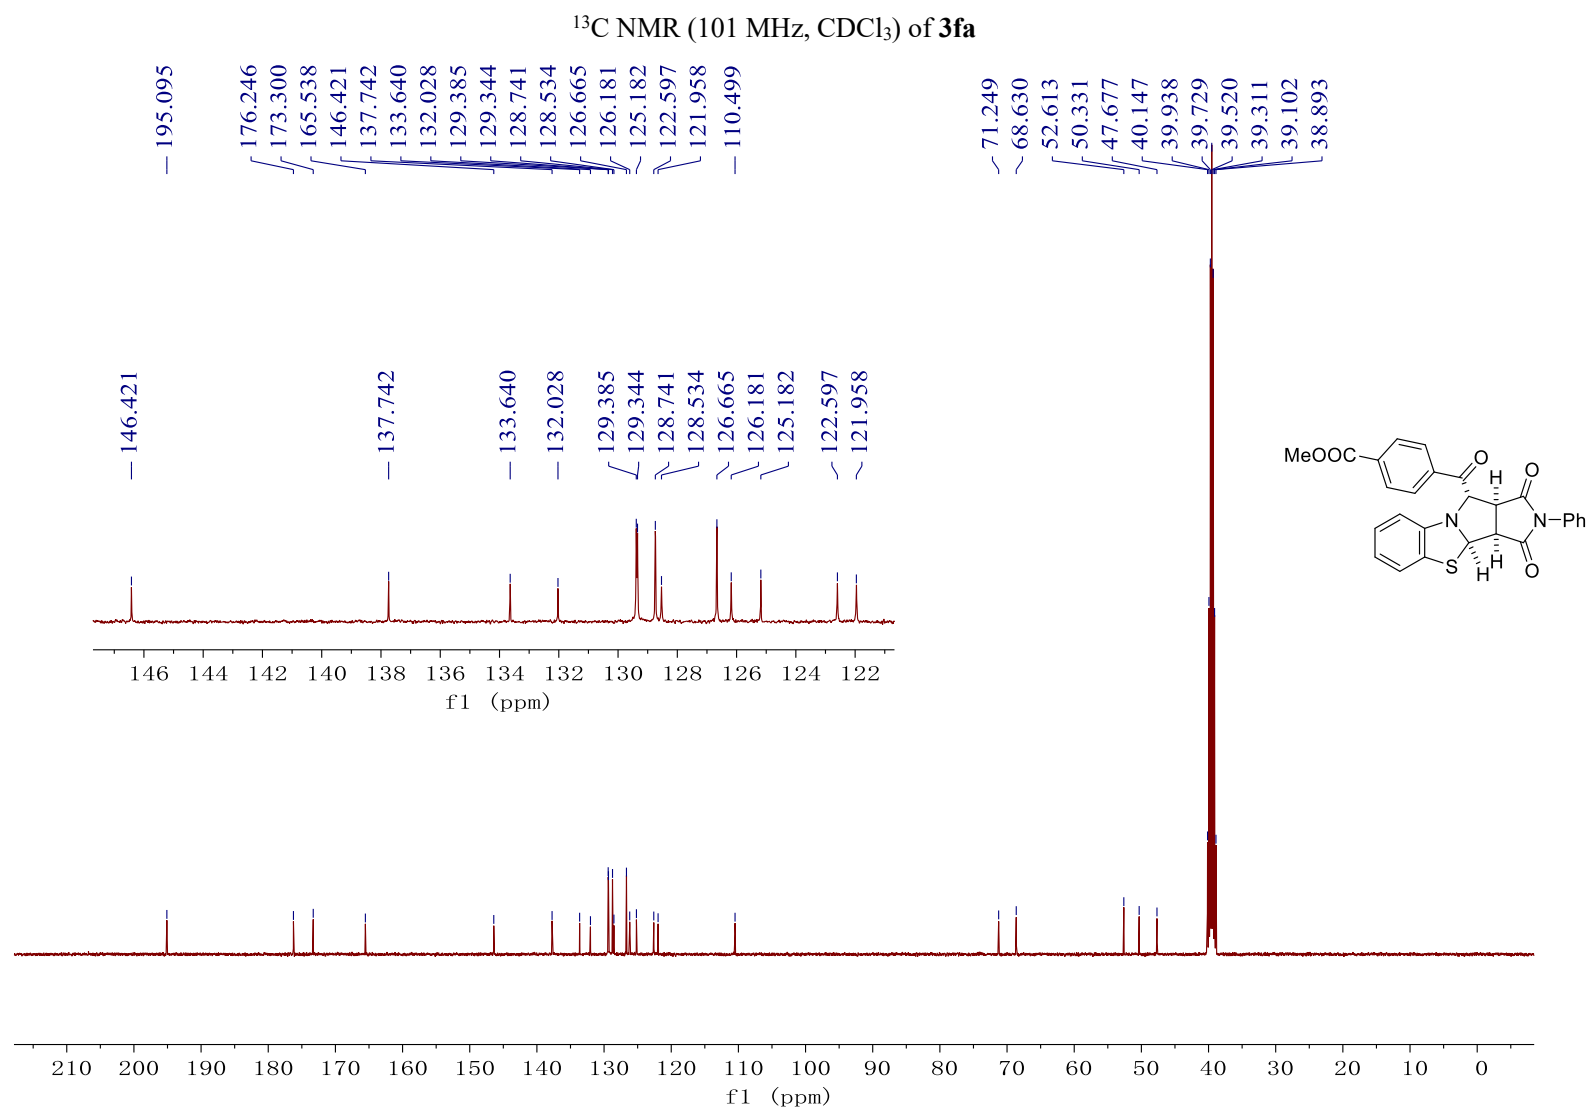

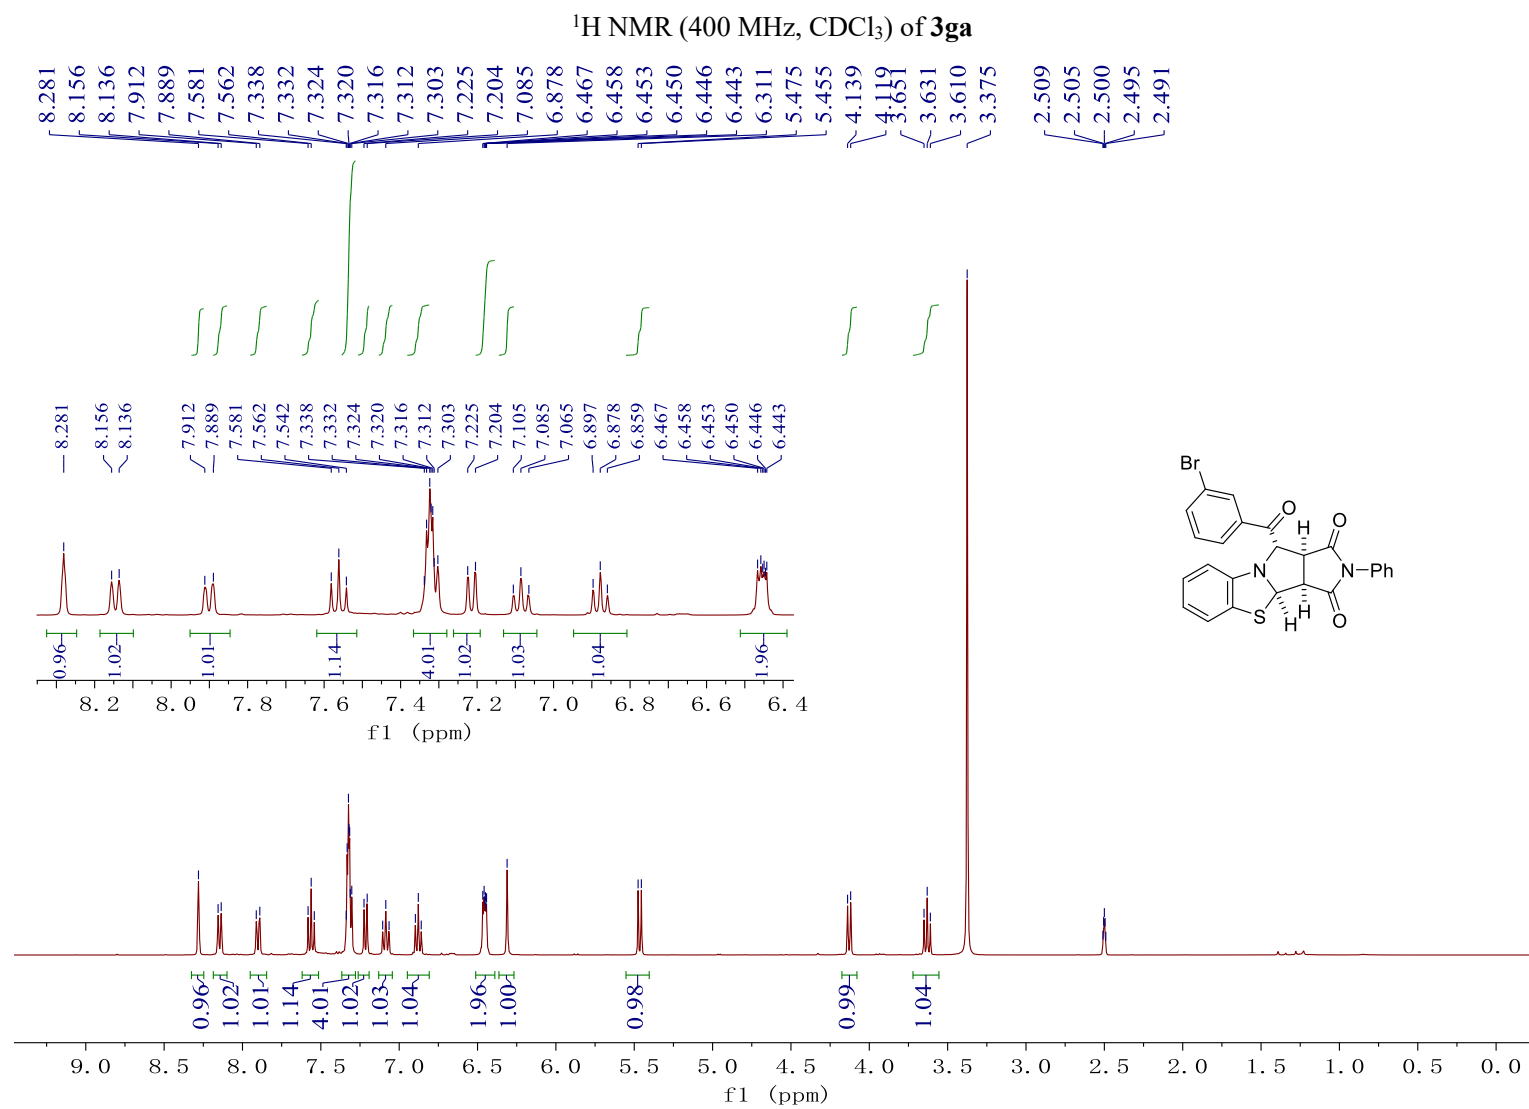

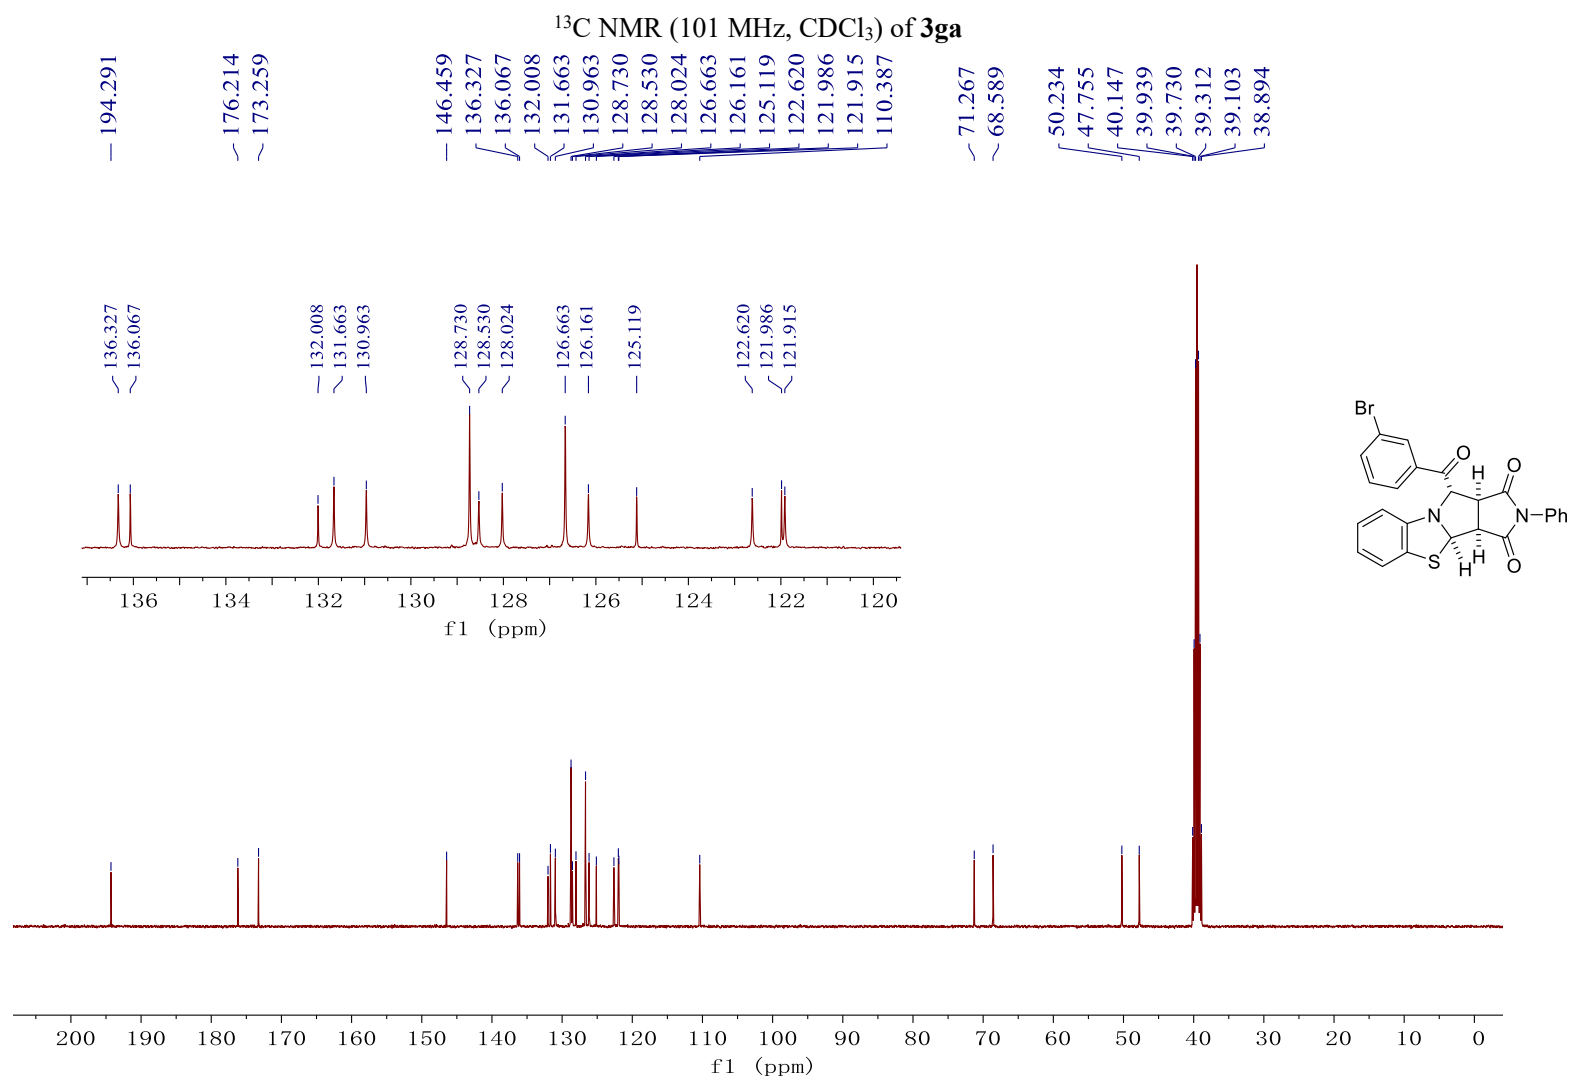

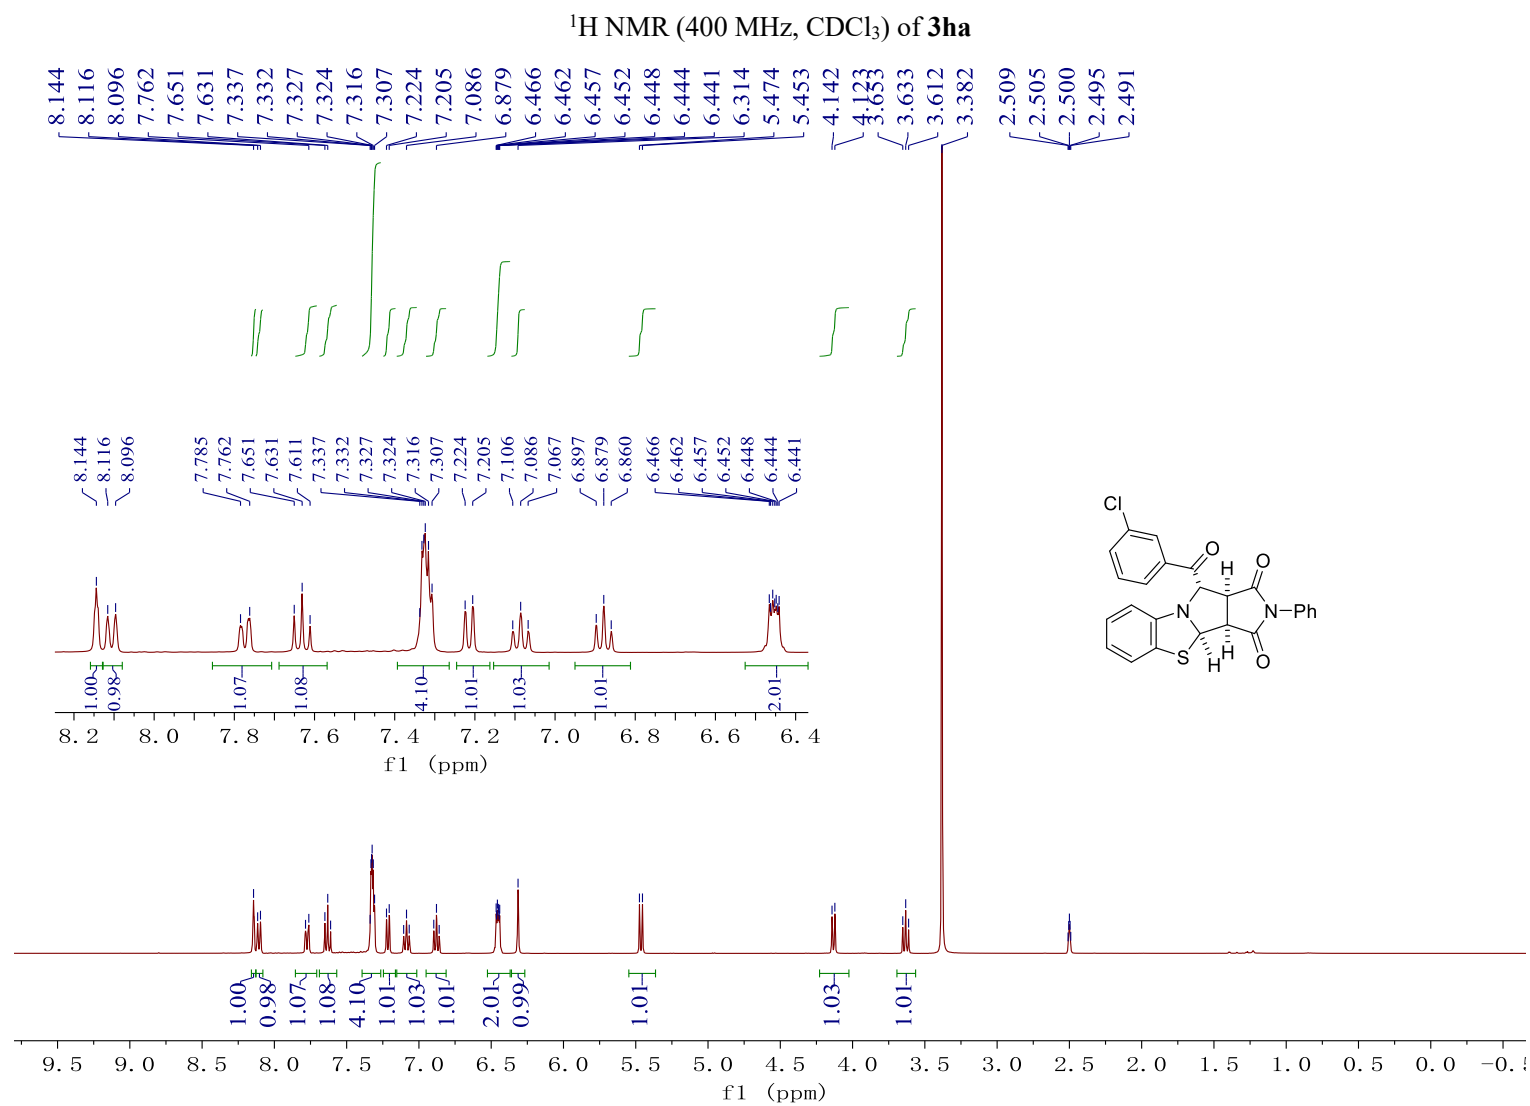

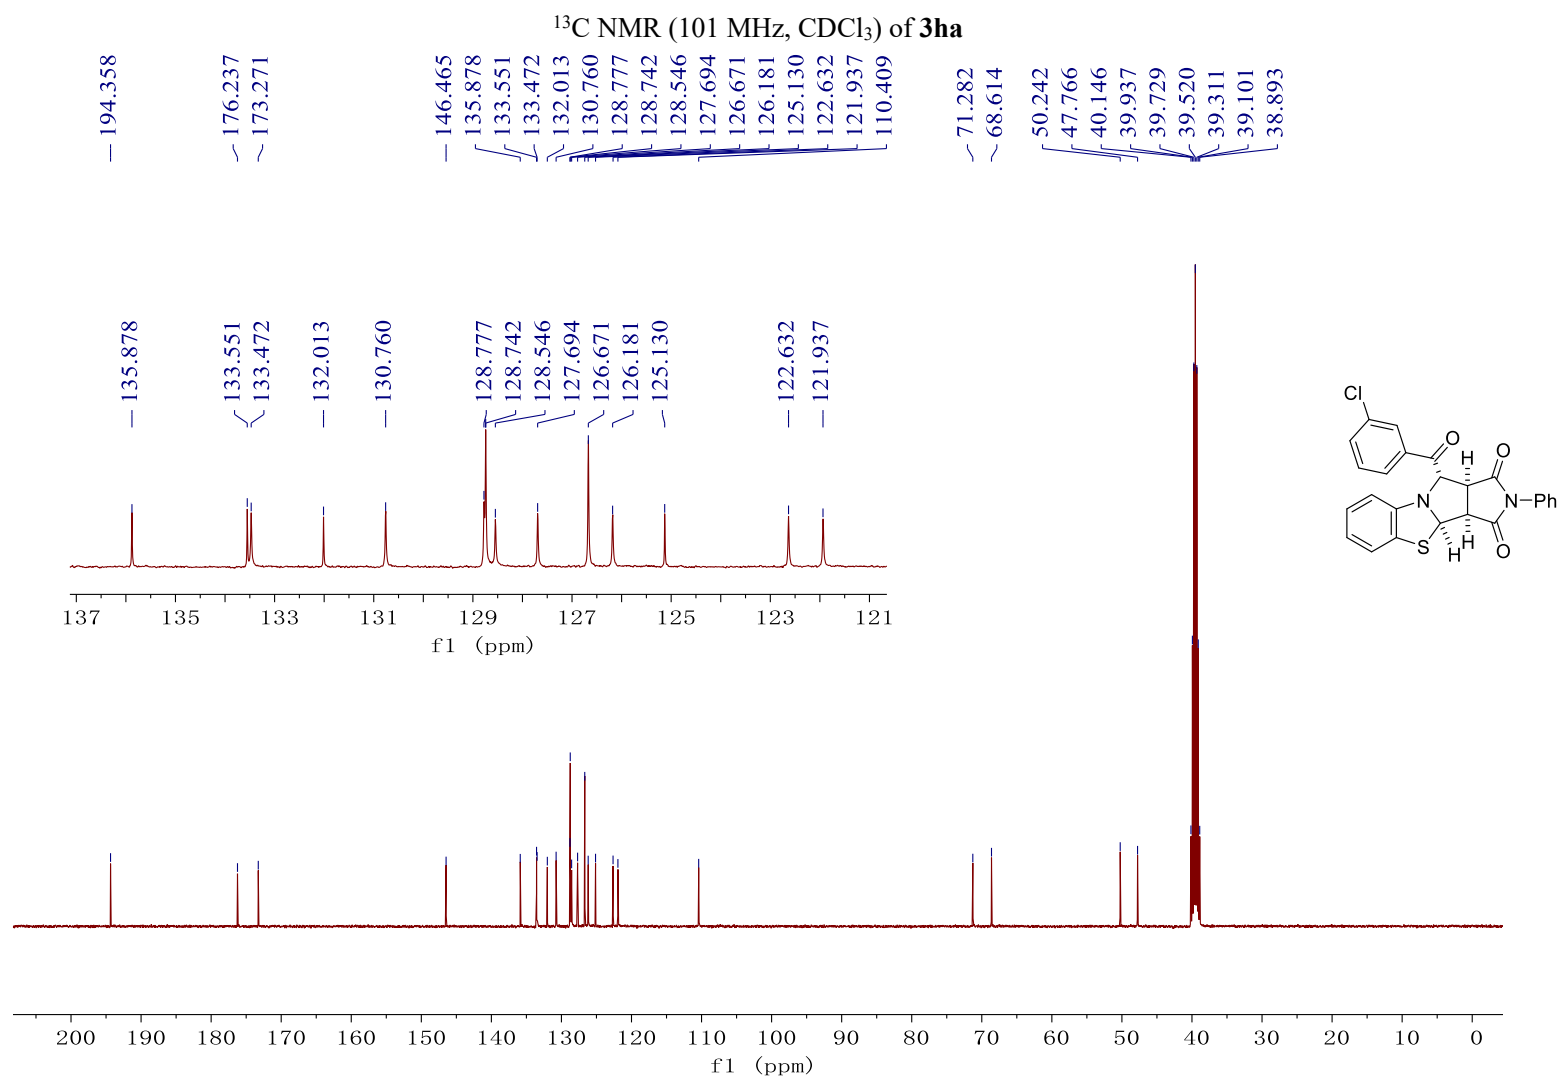



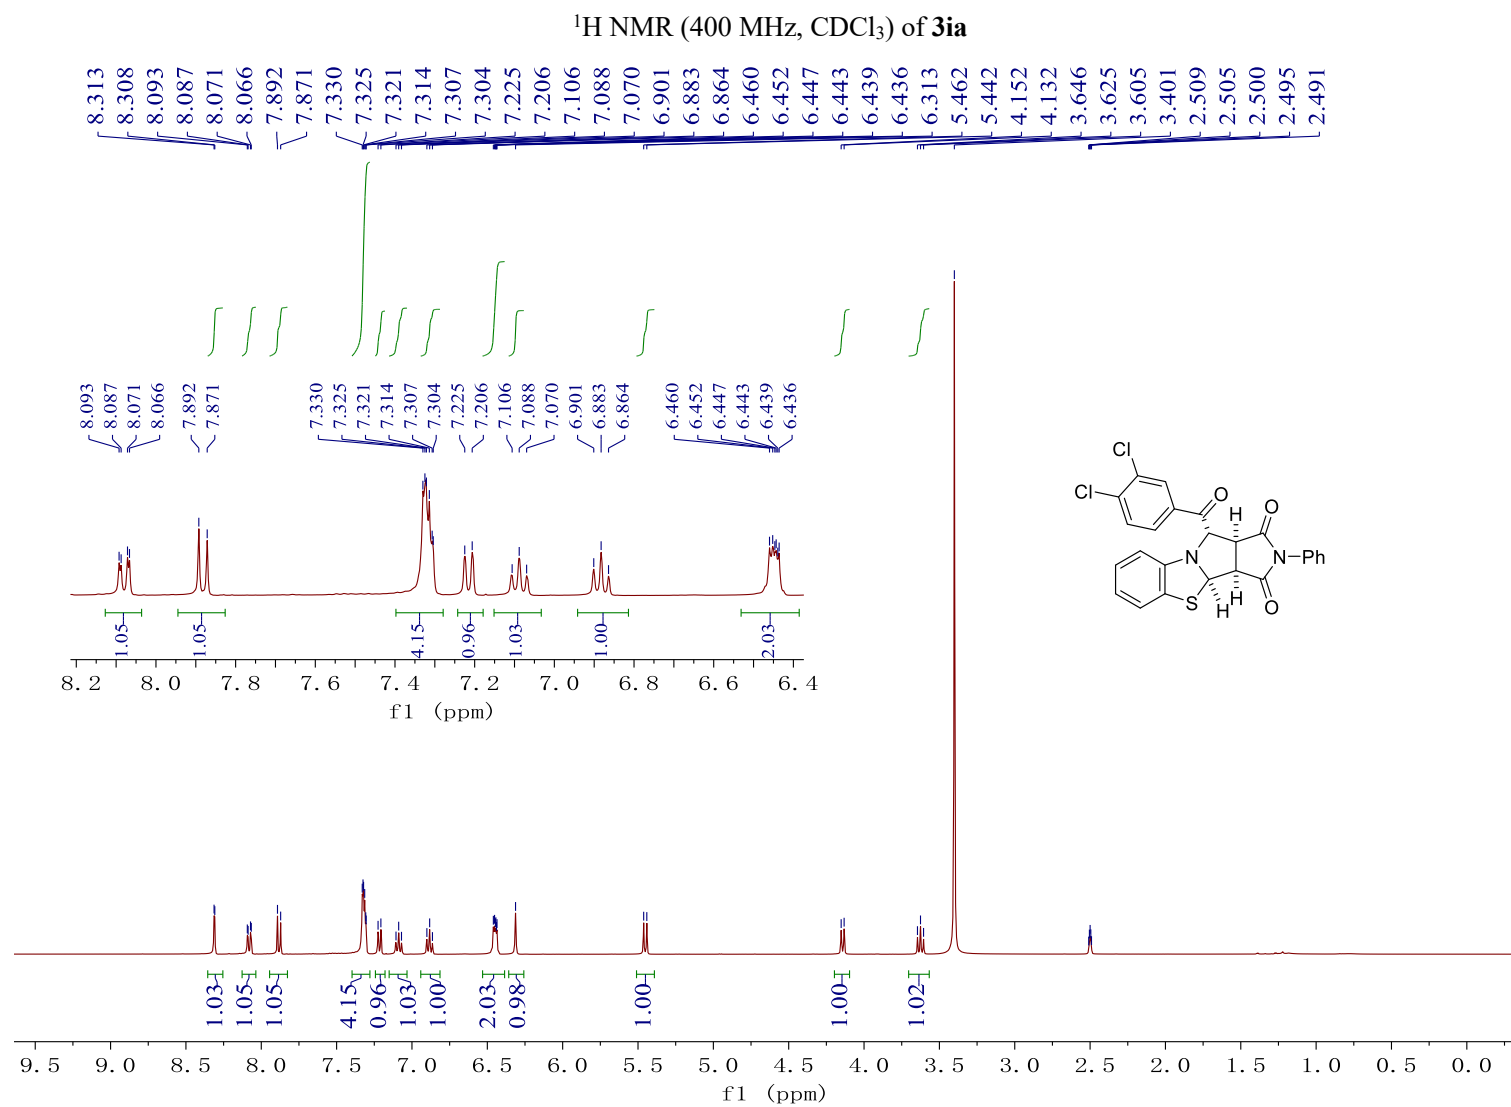

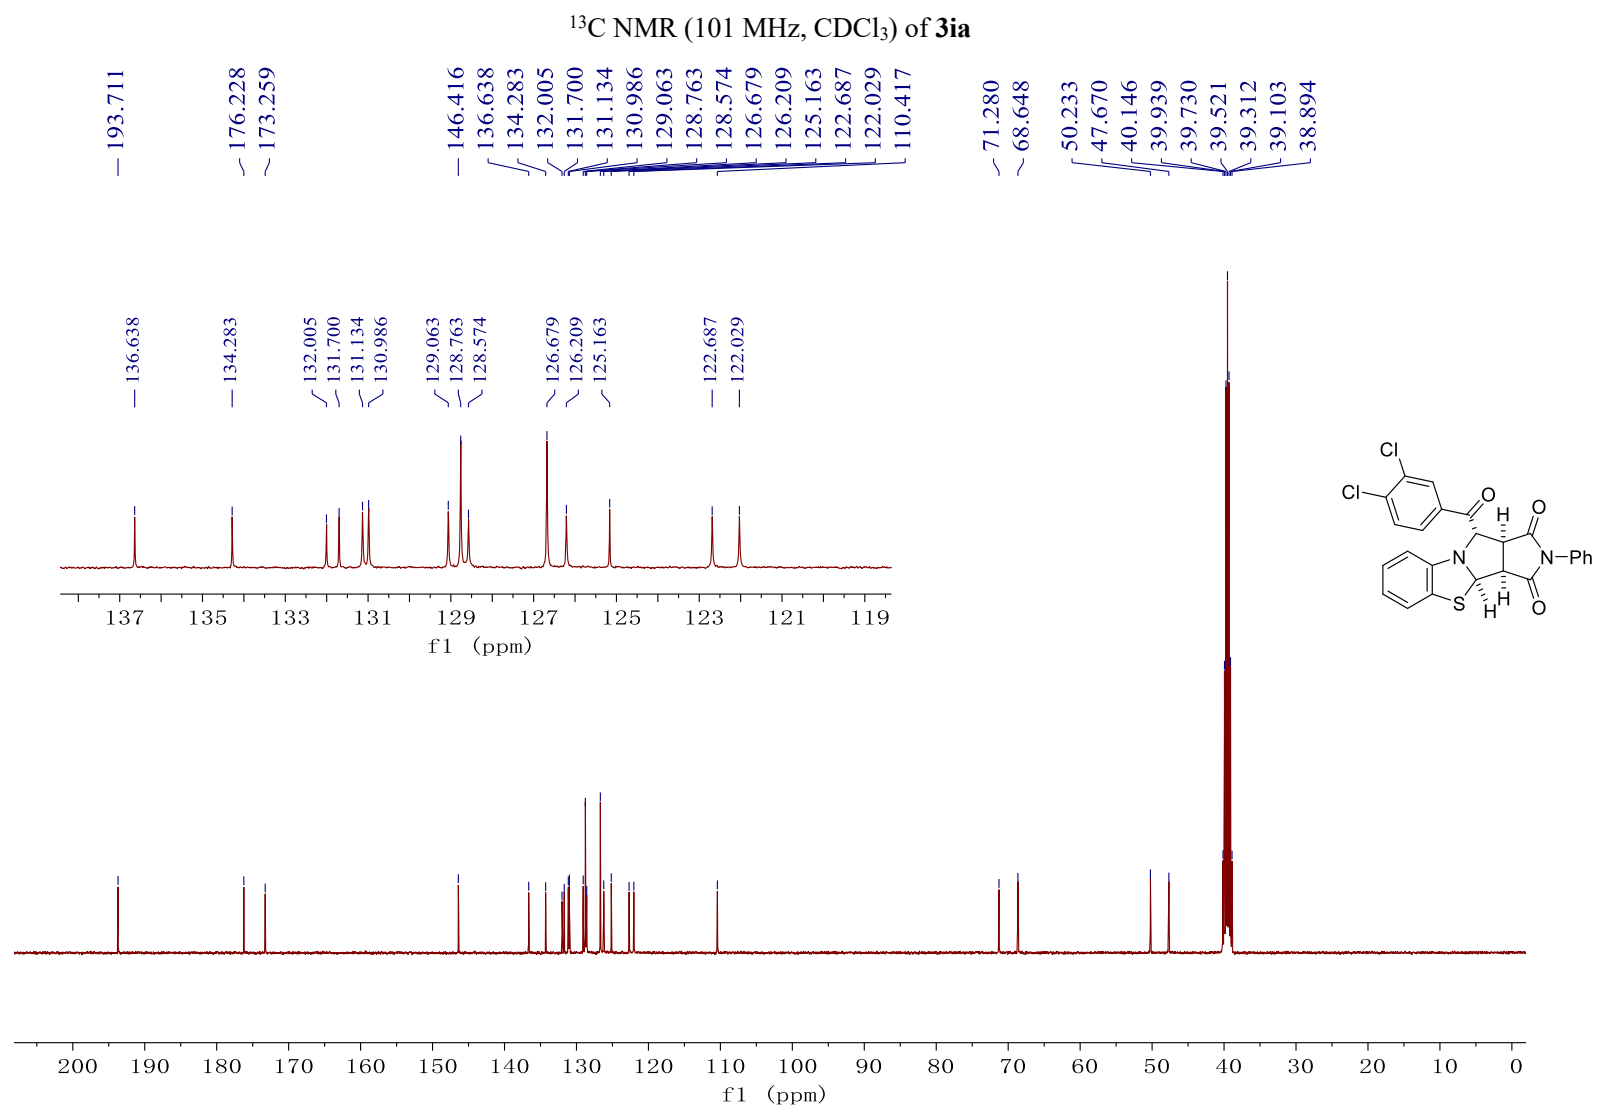

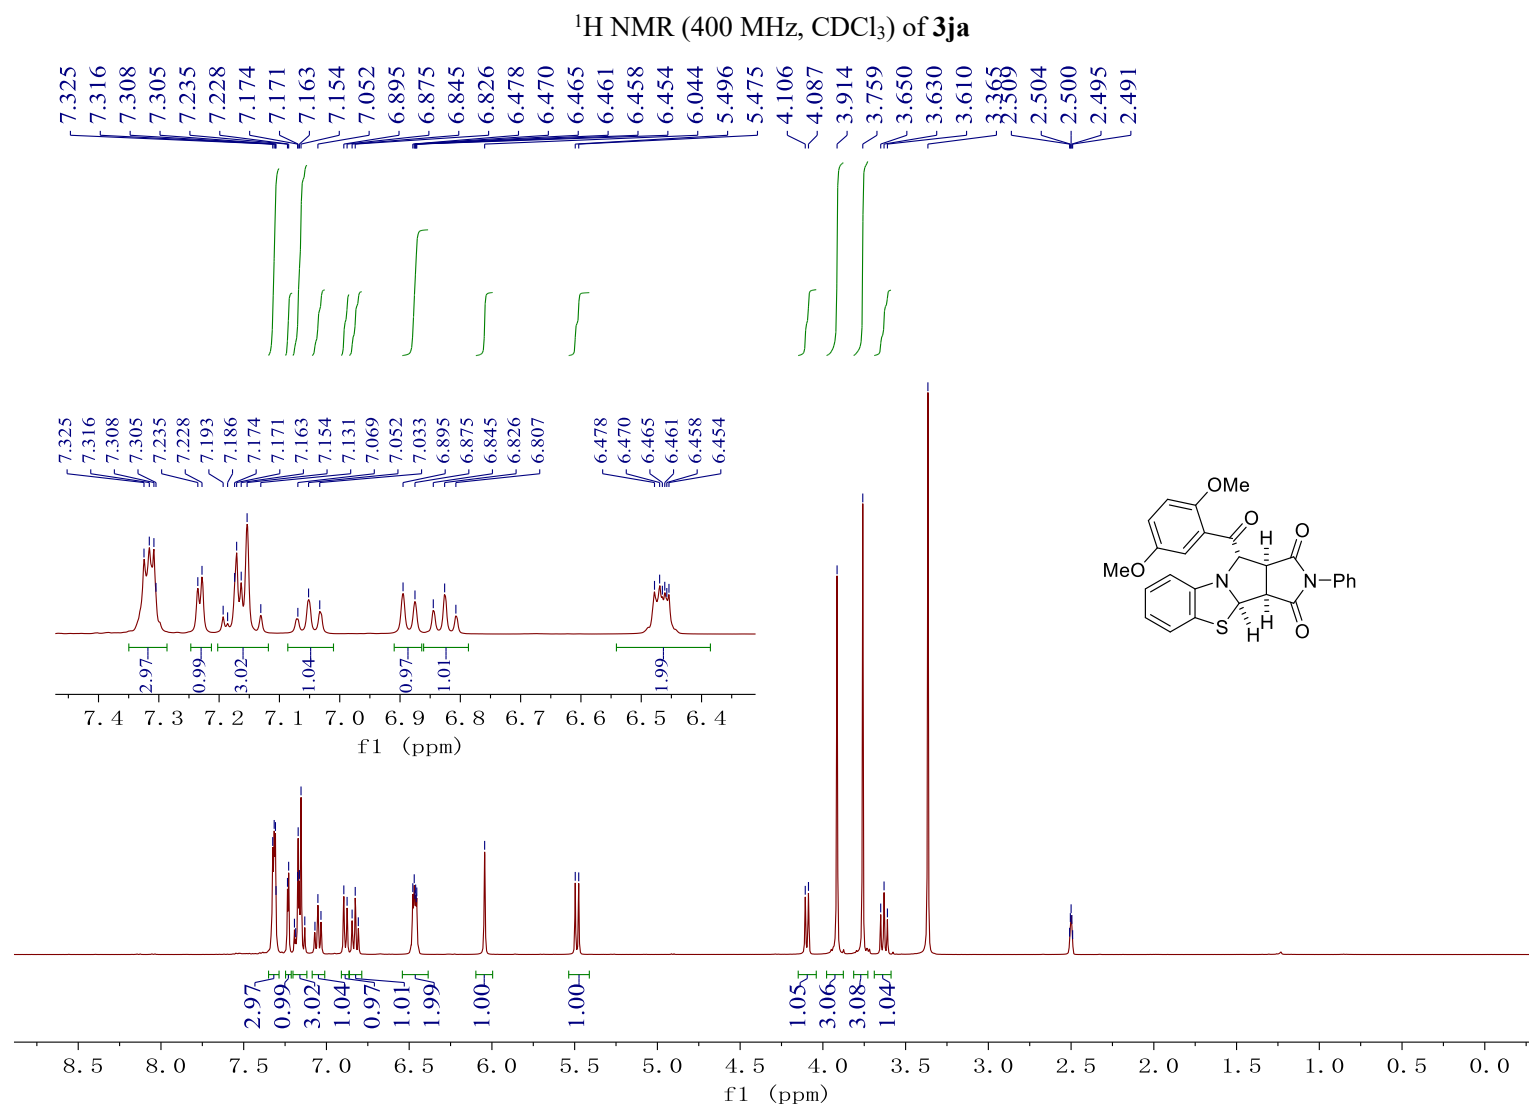

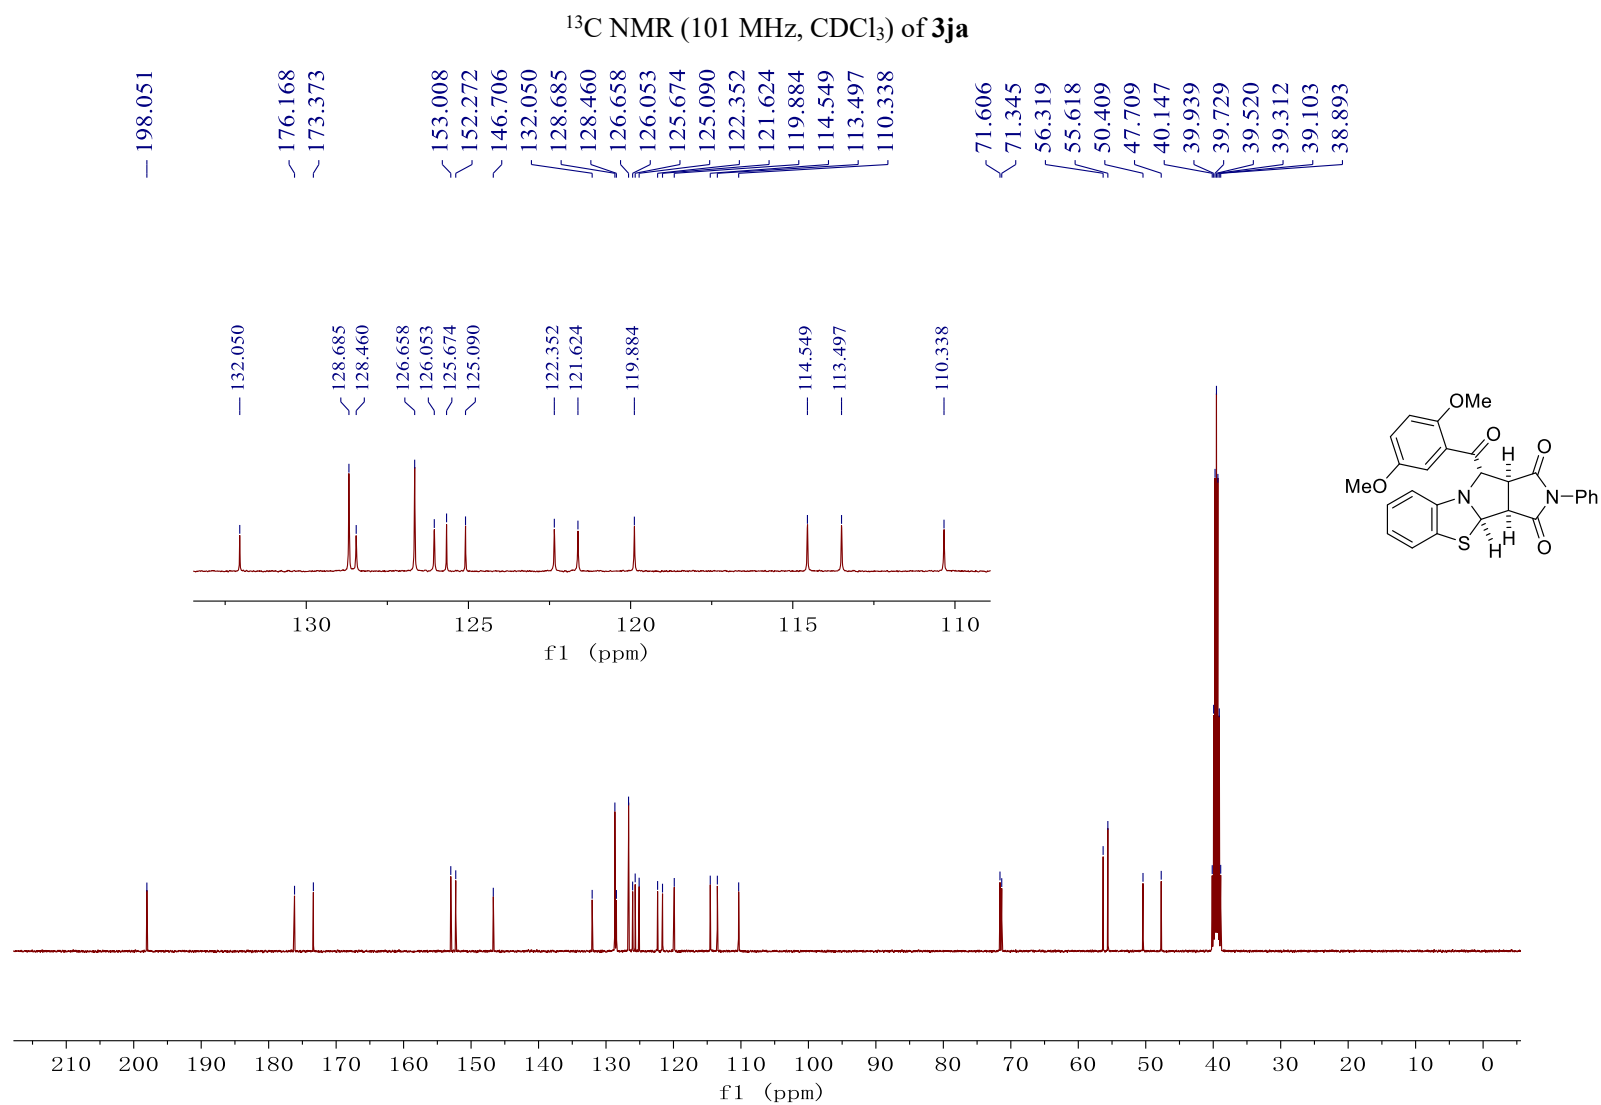

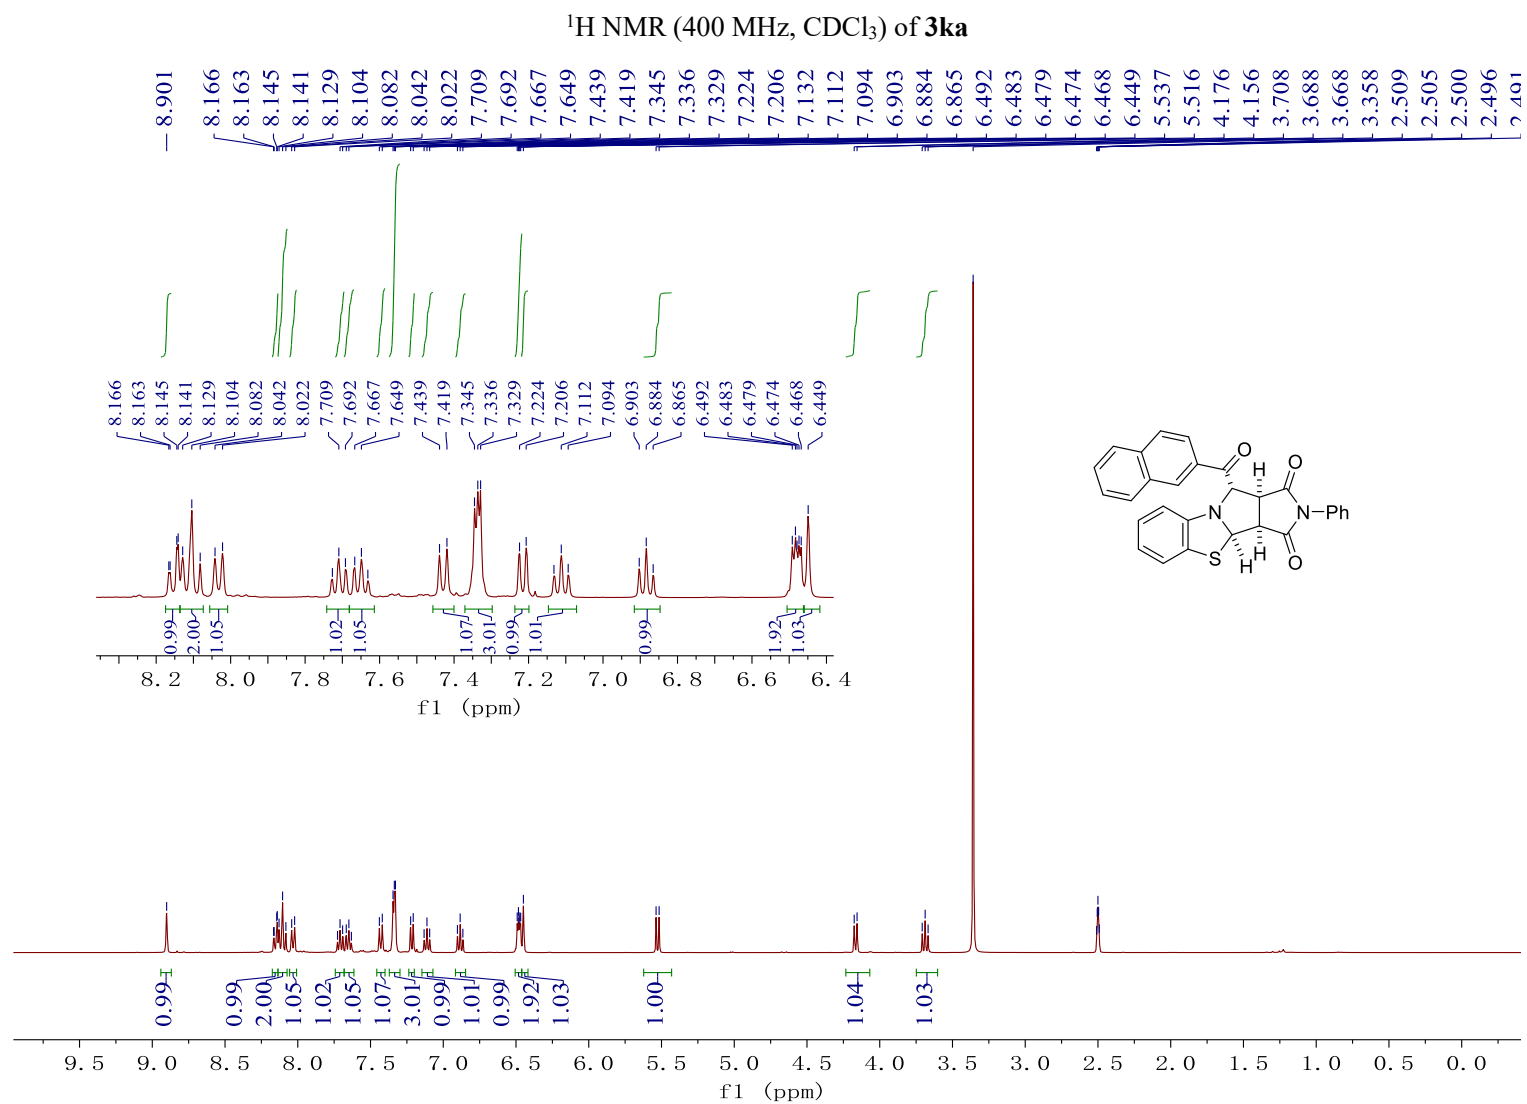

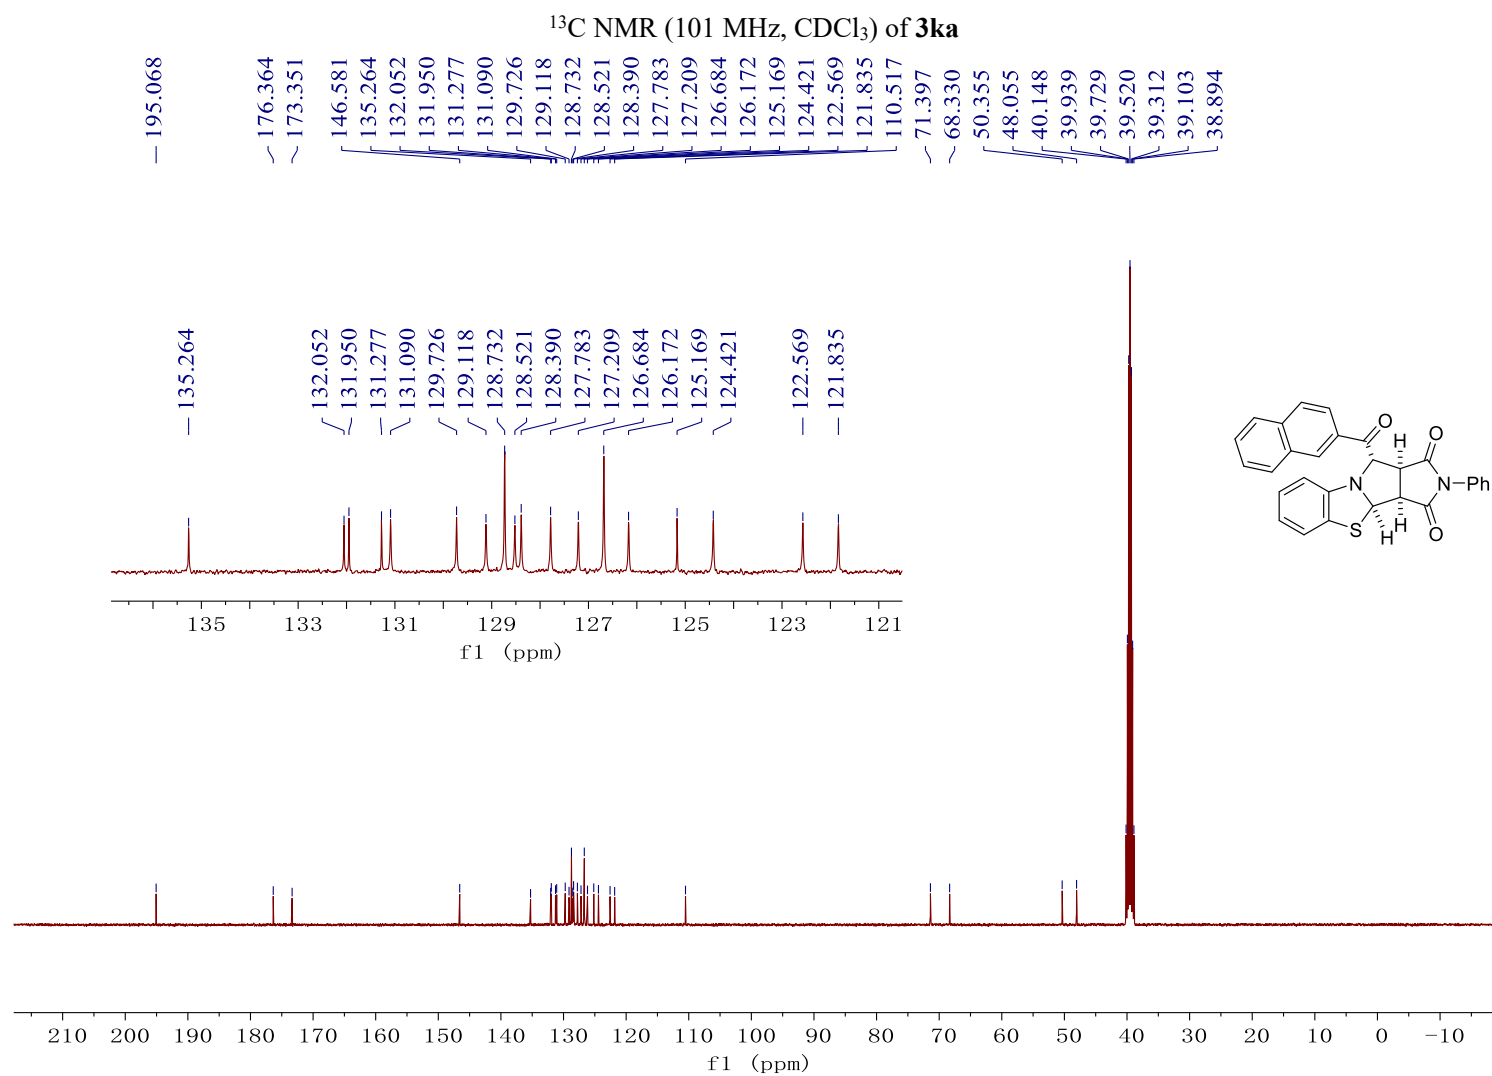

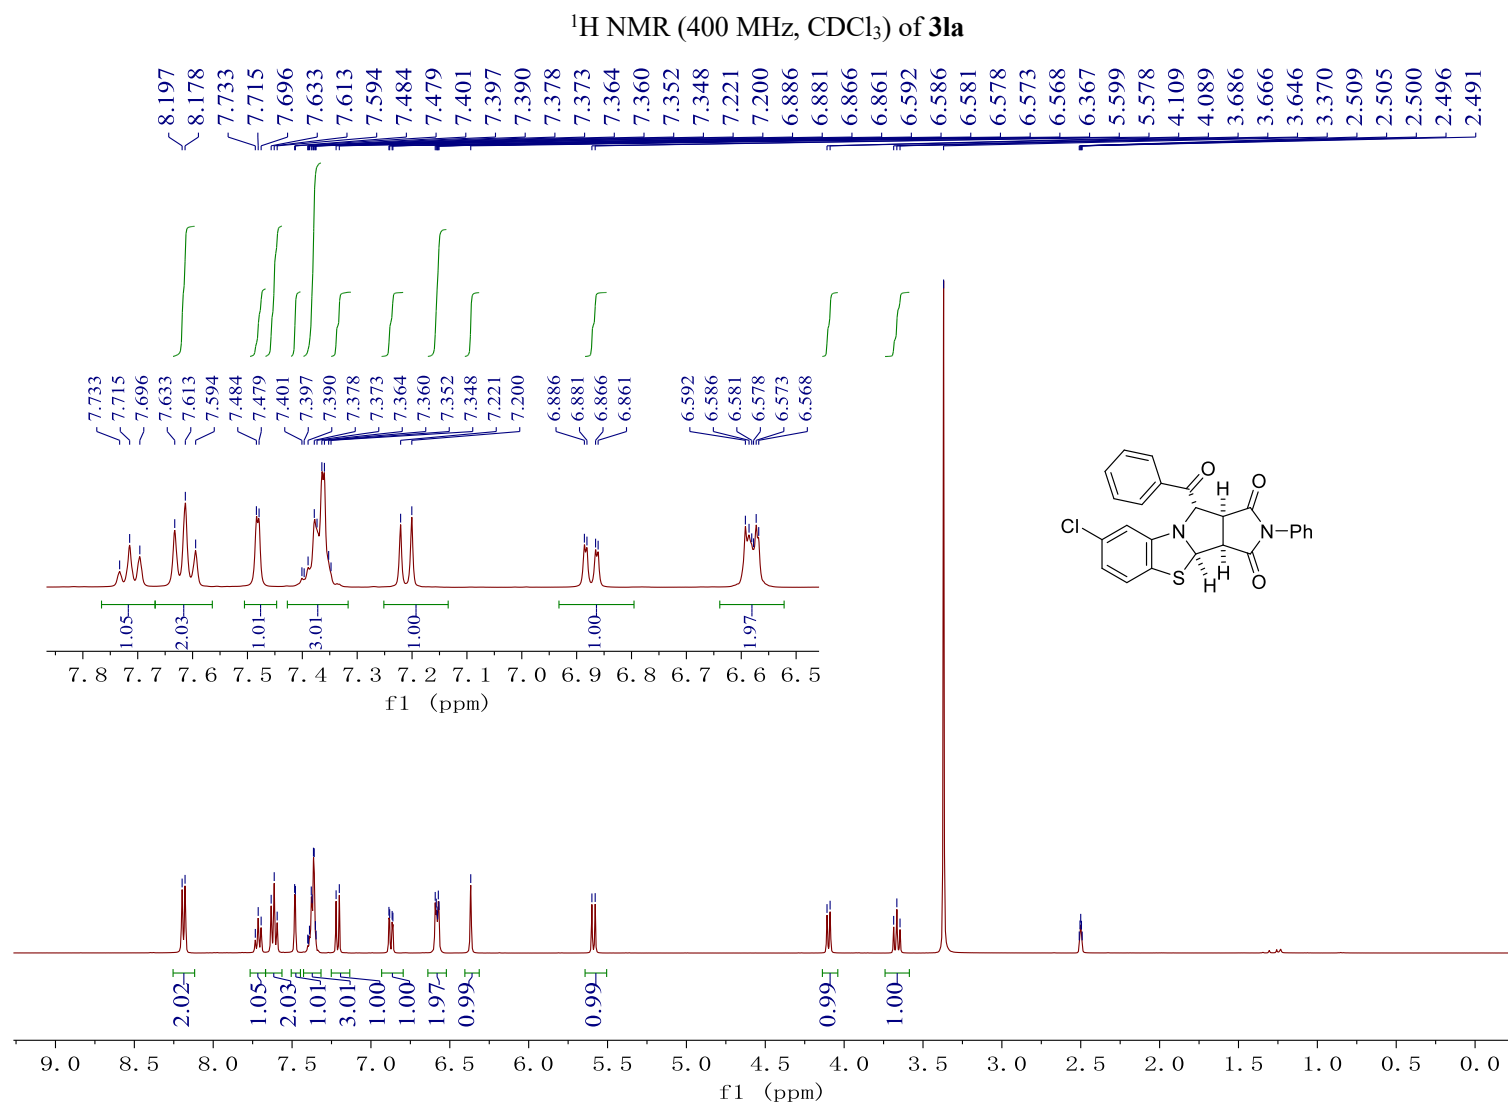

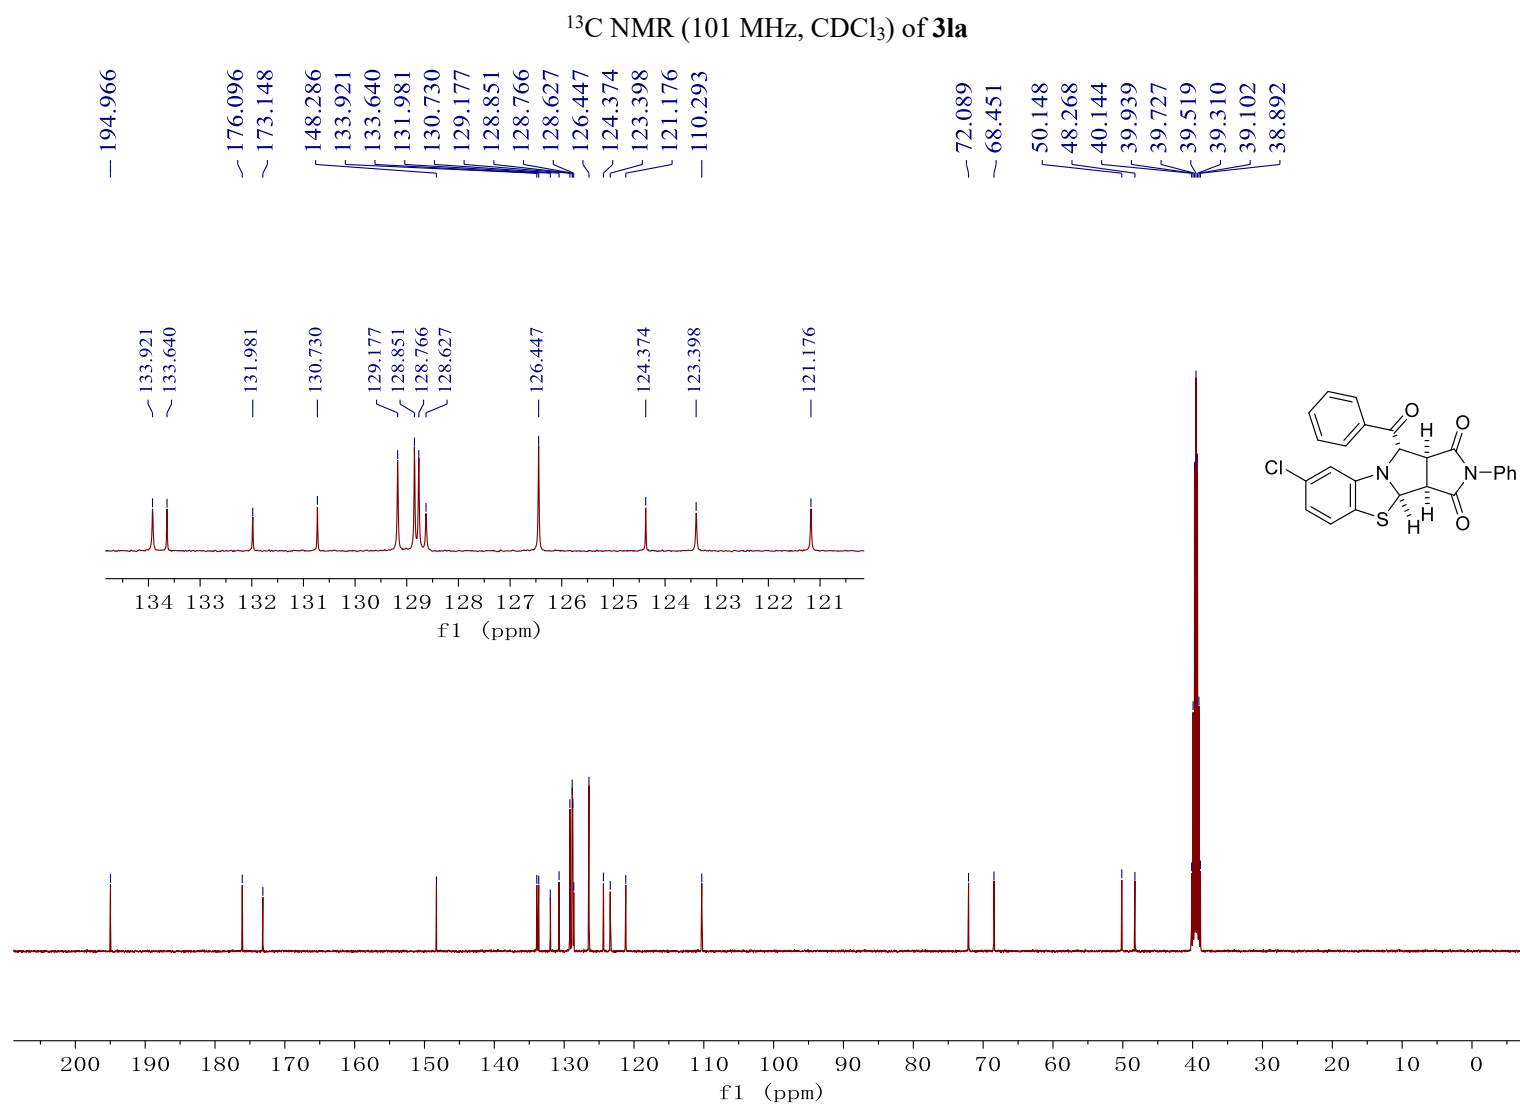



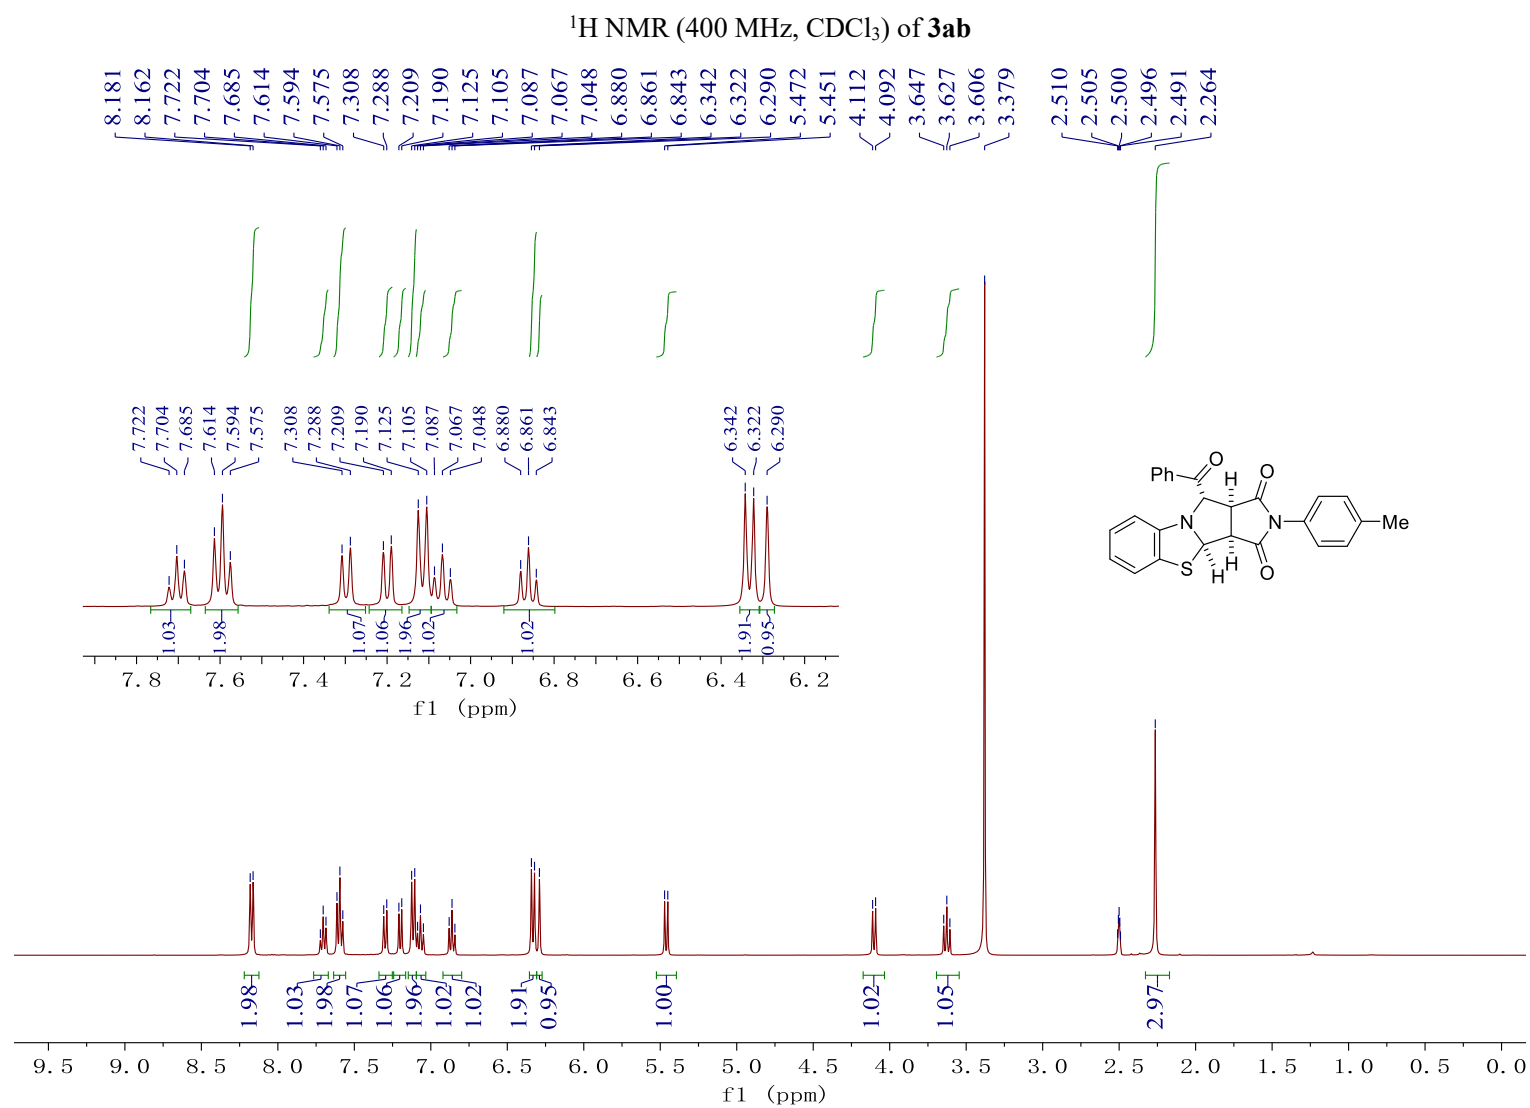

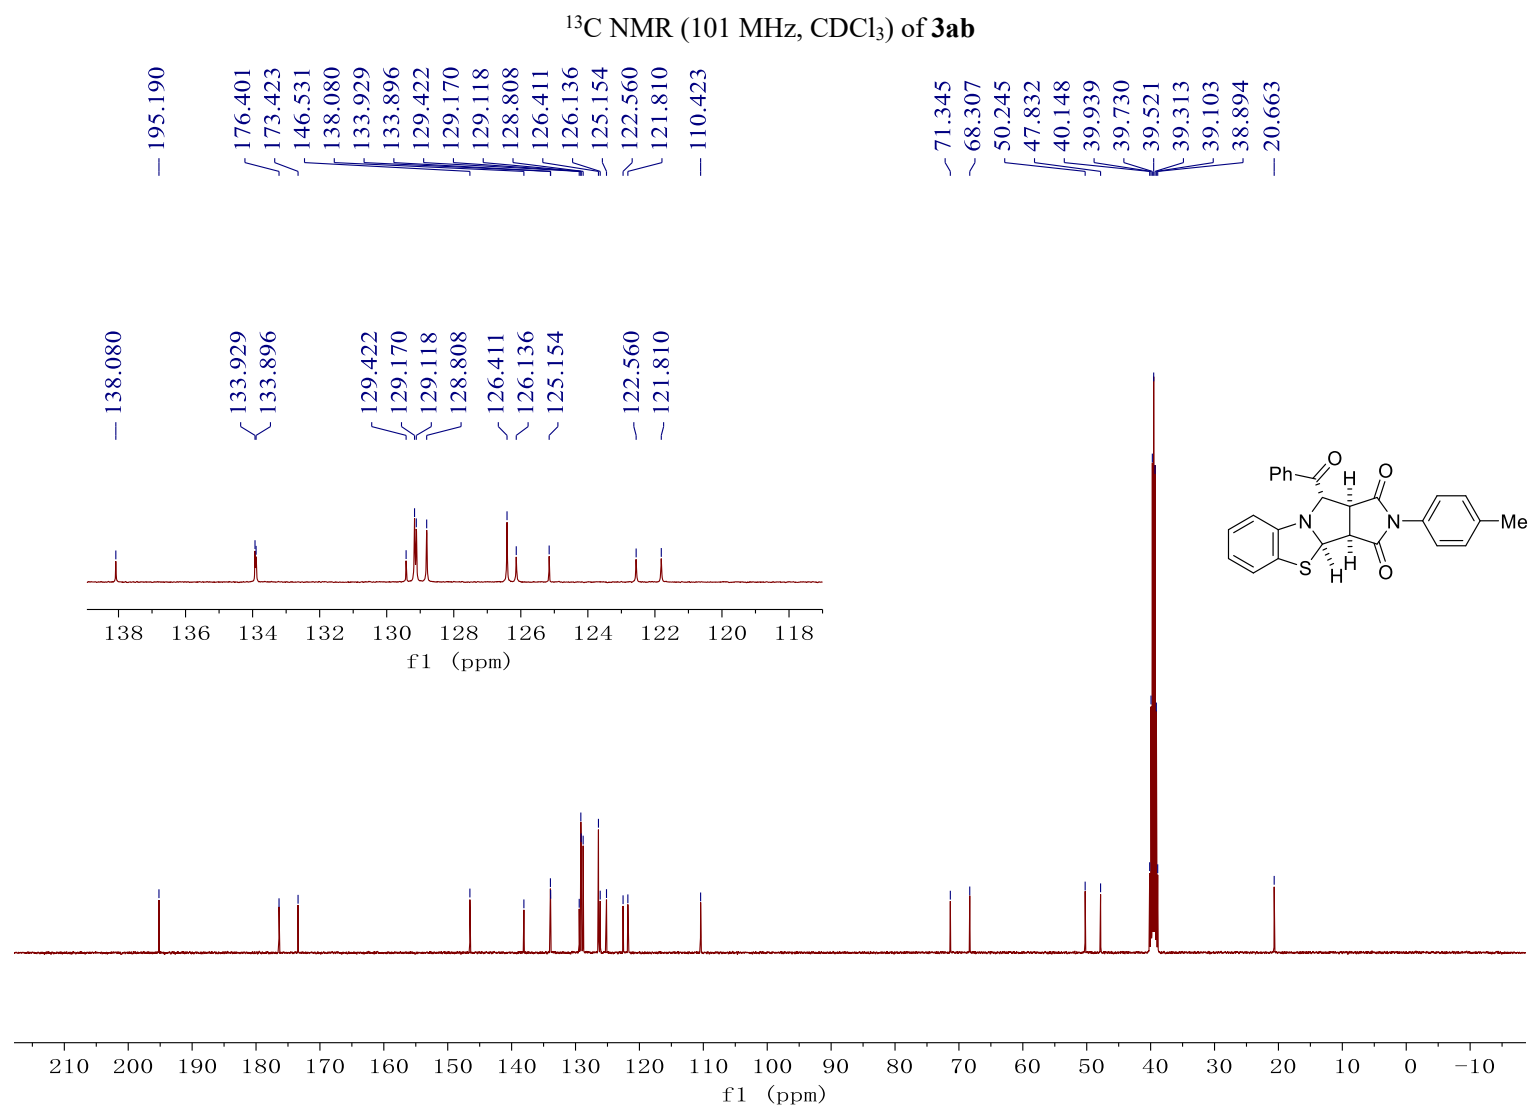

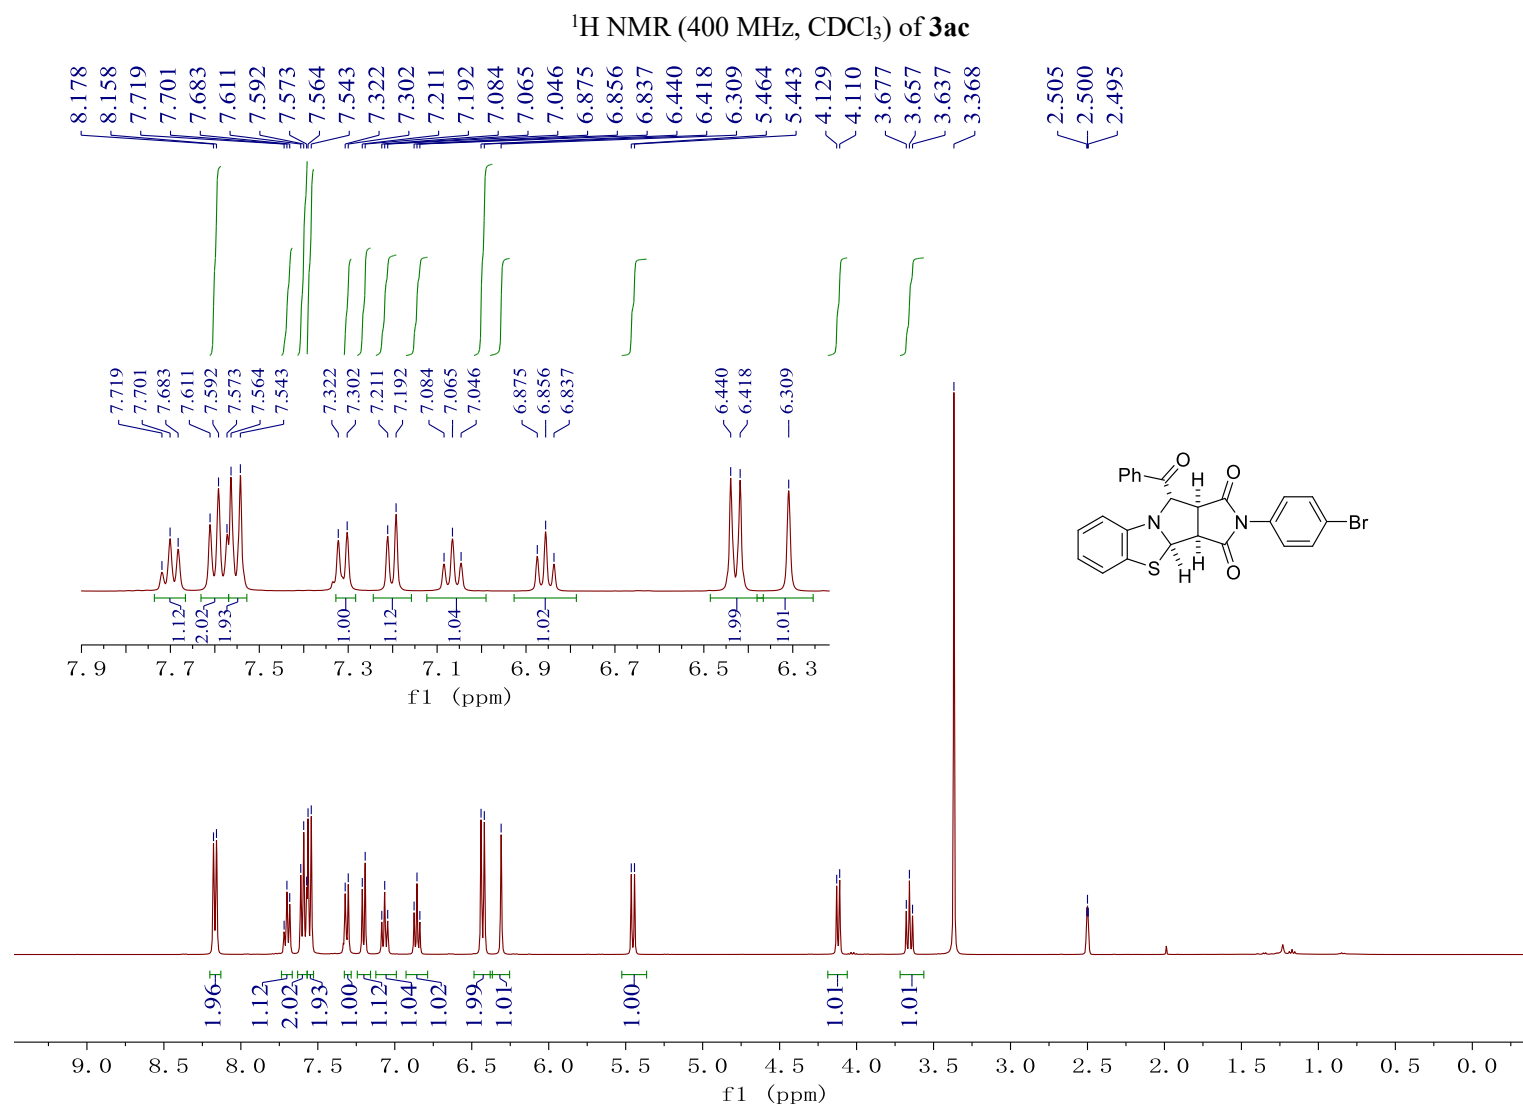

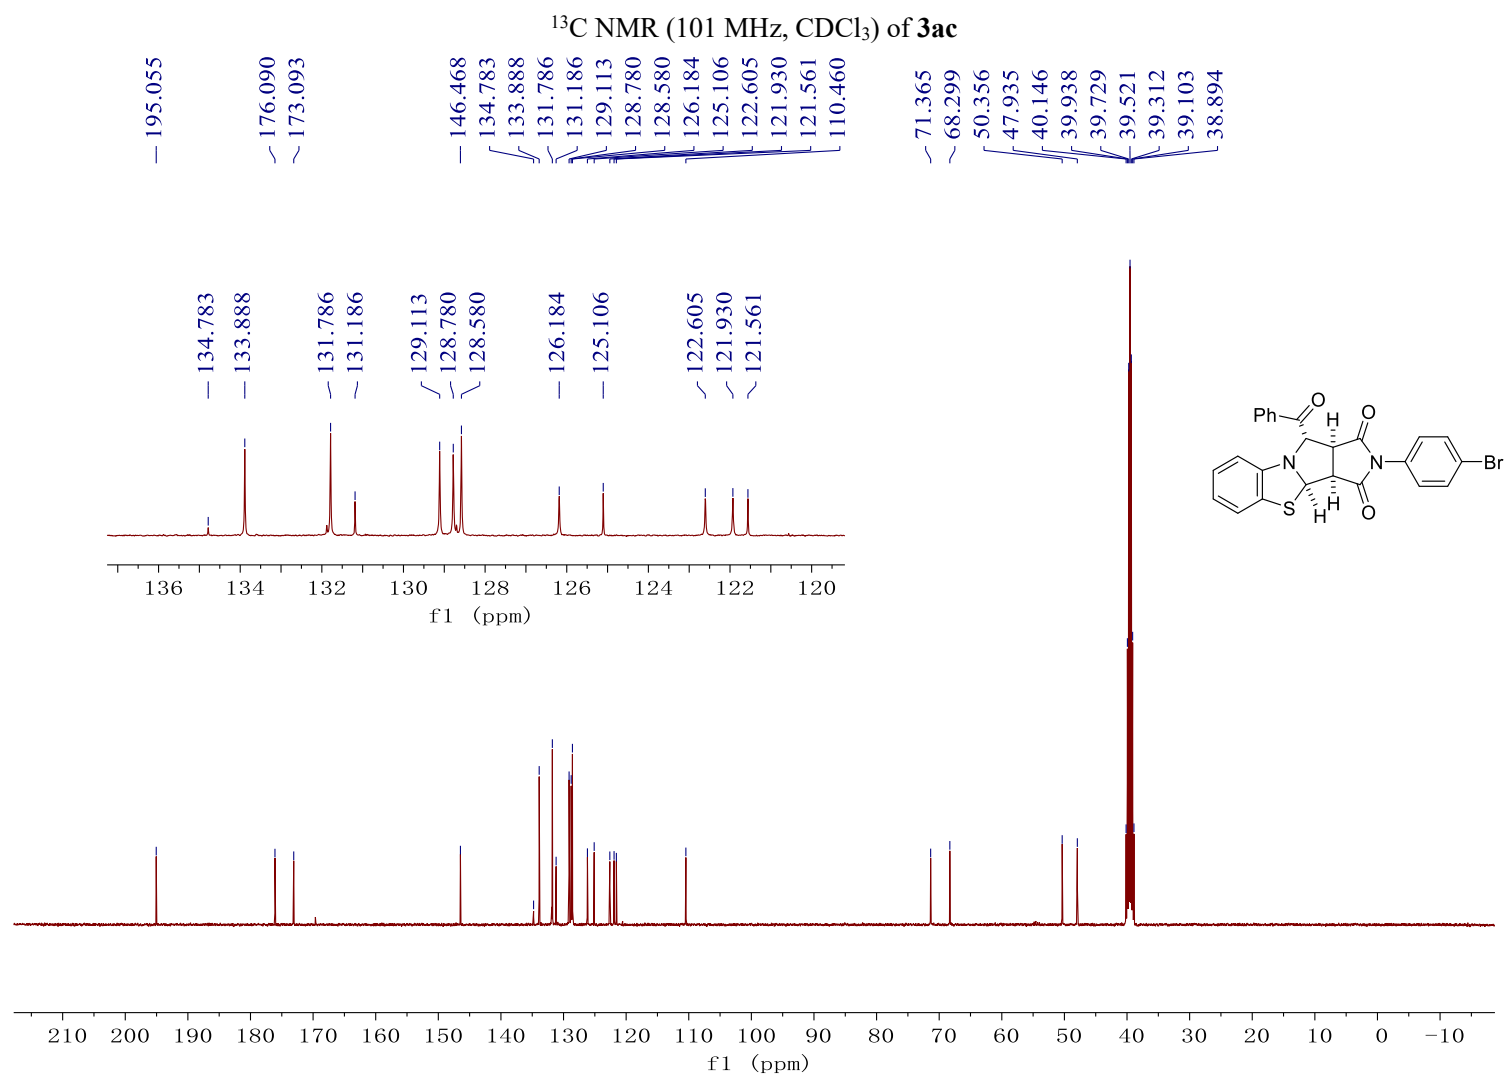

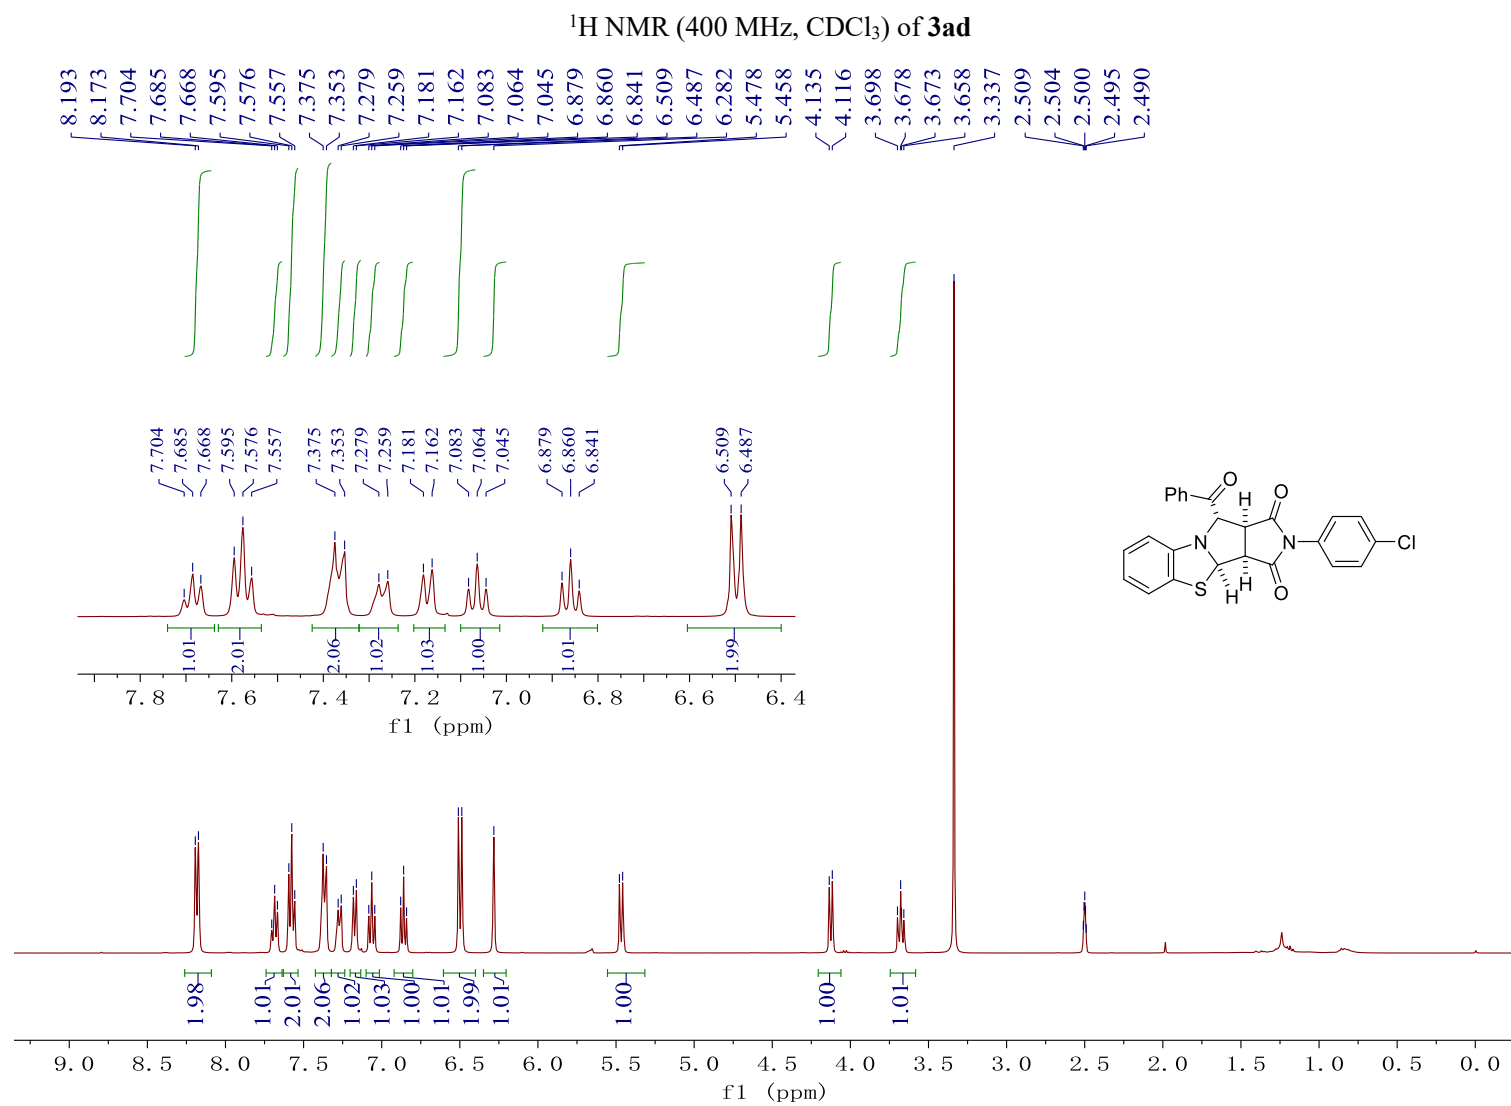

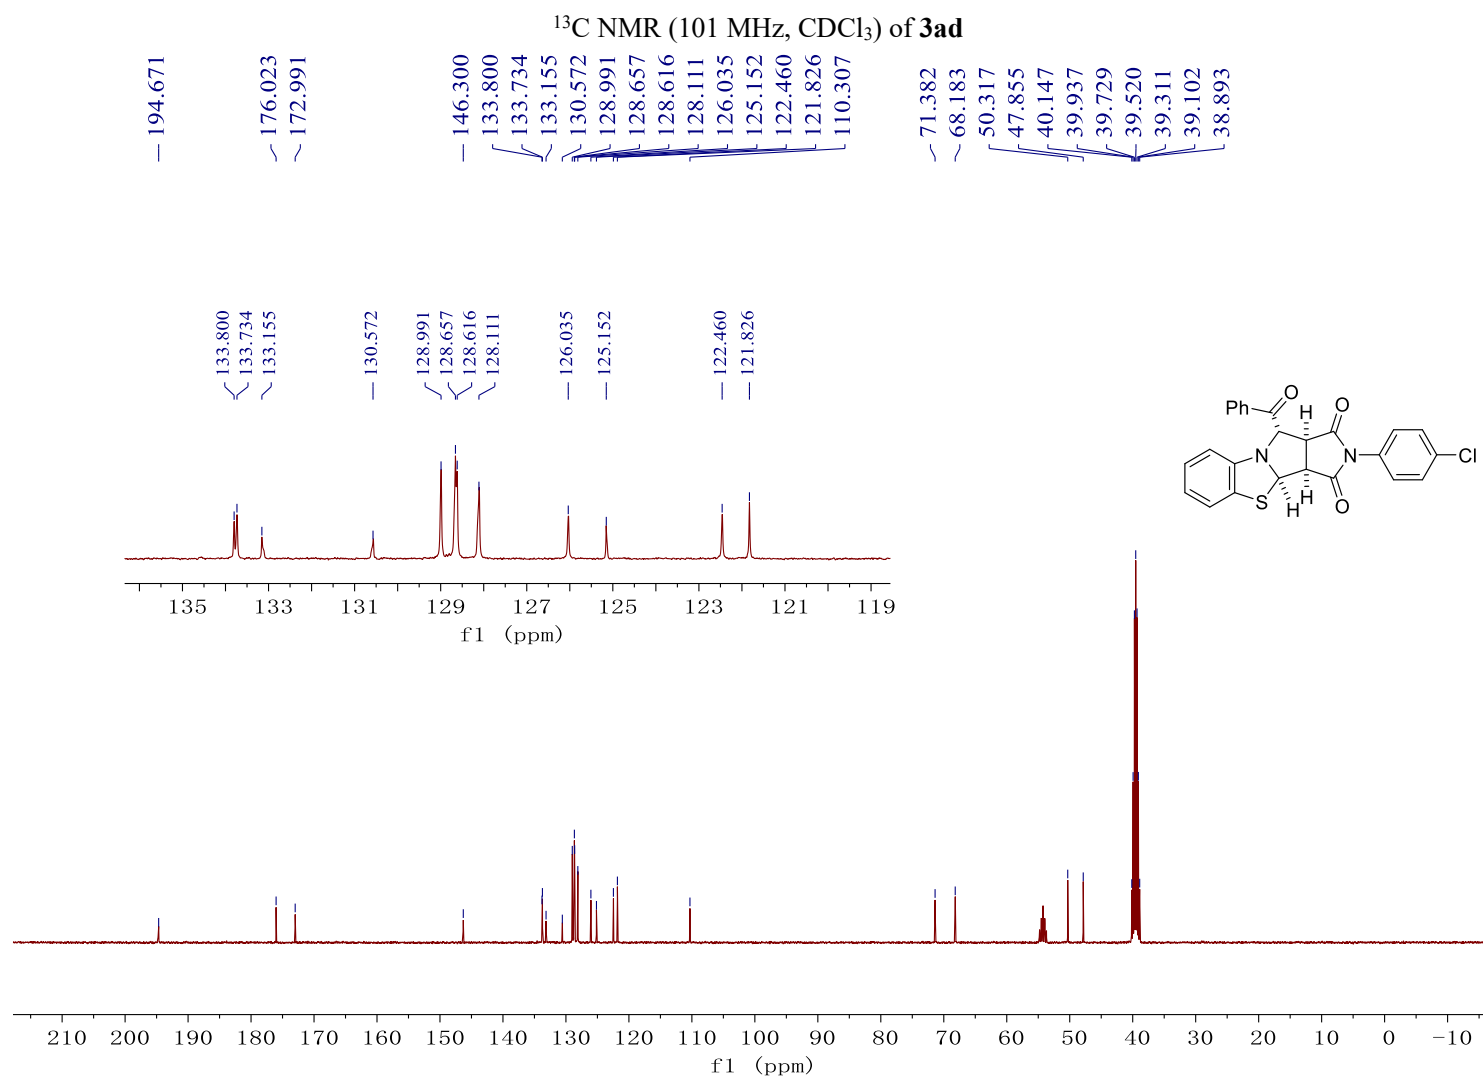

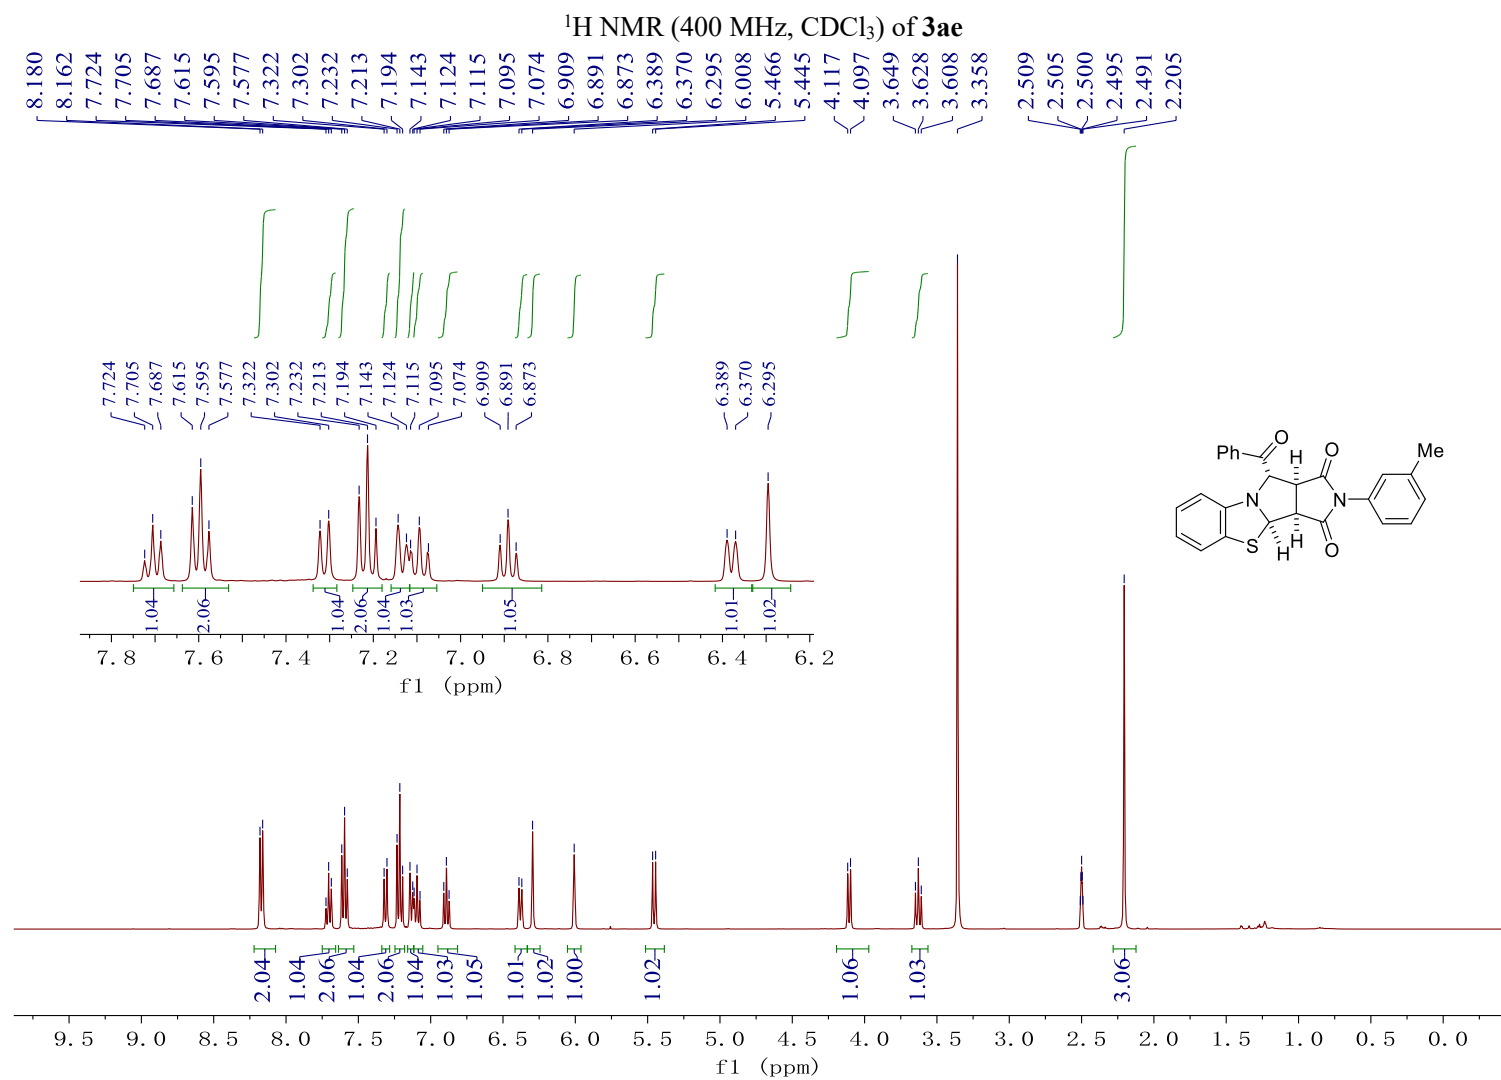

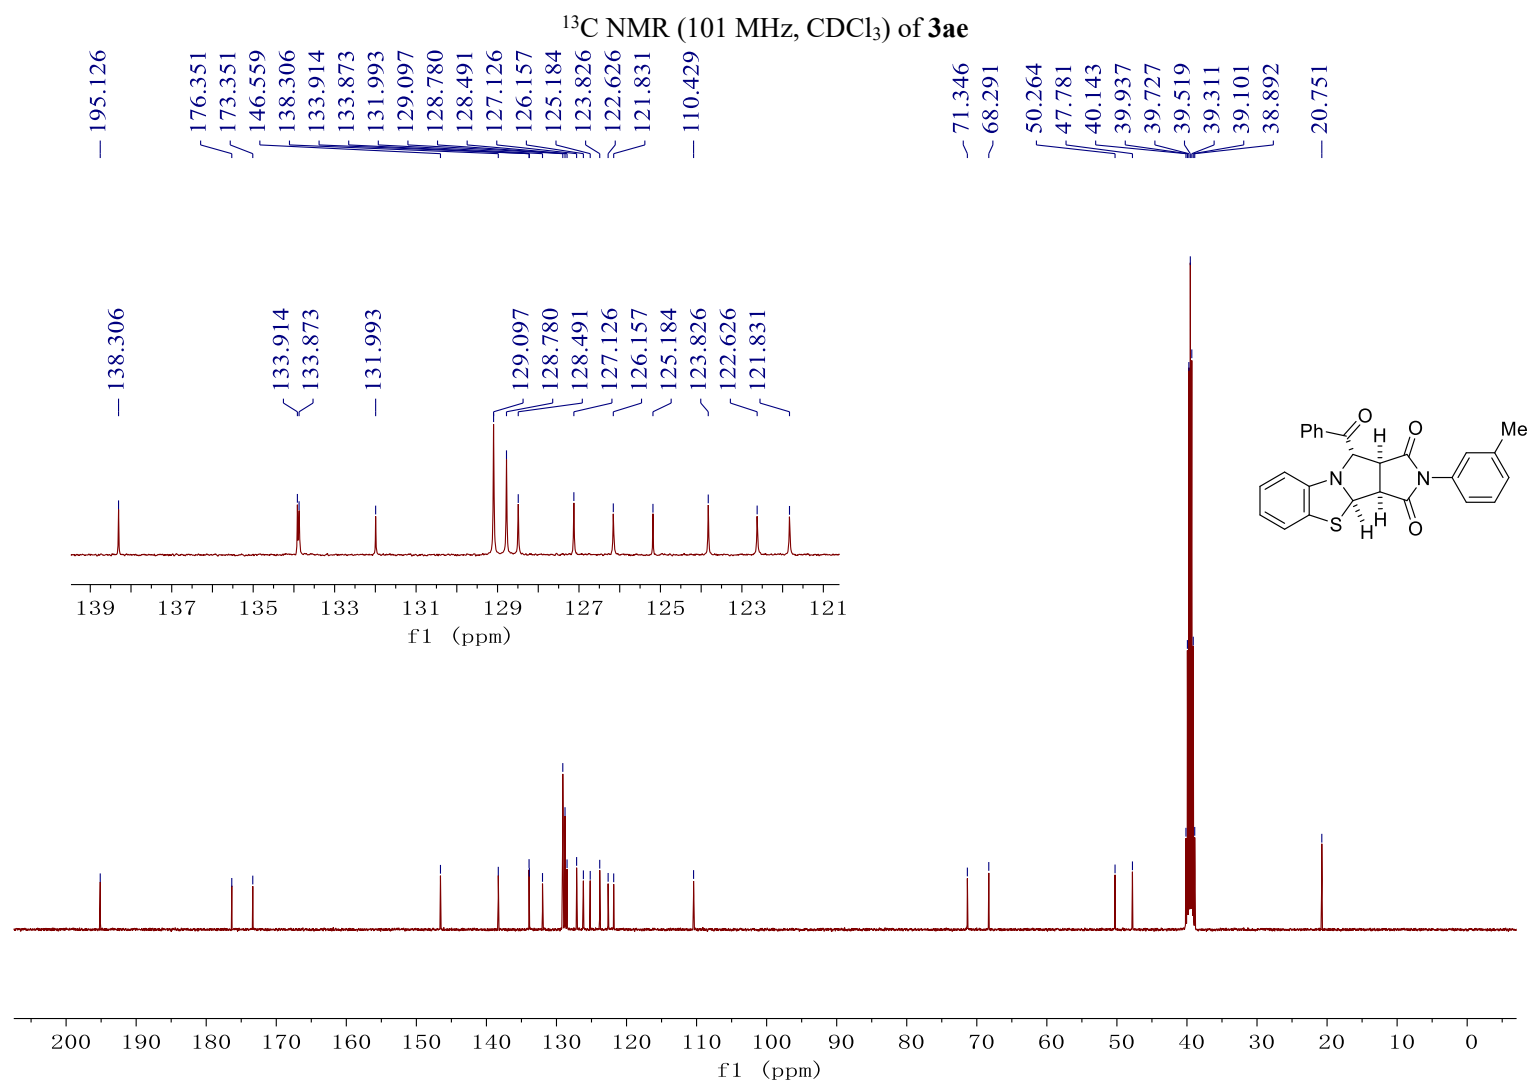



<sup>1</sup>H NMR (400 MHz, CDCl<sub>3</sub>) of **3af**

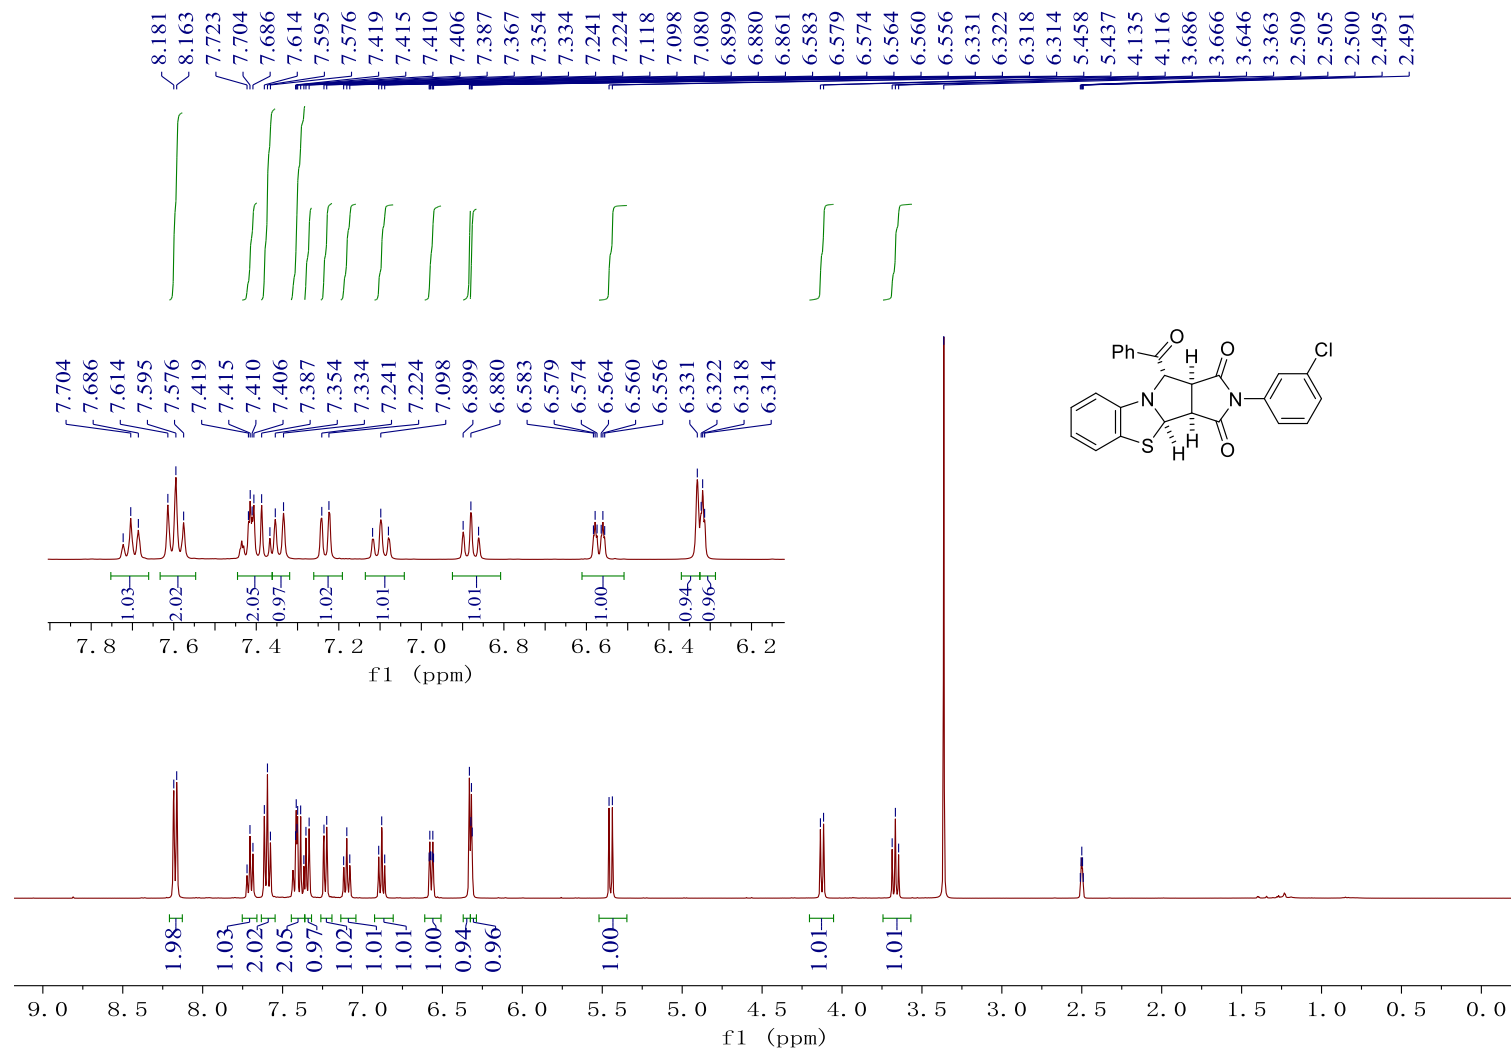

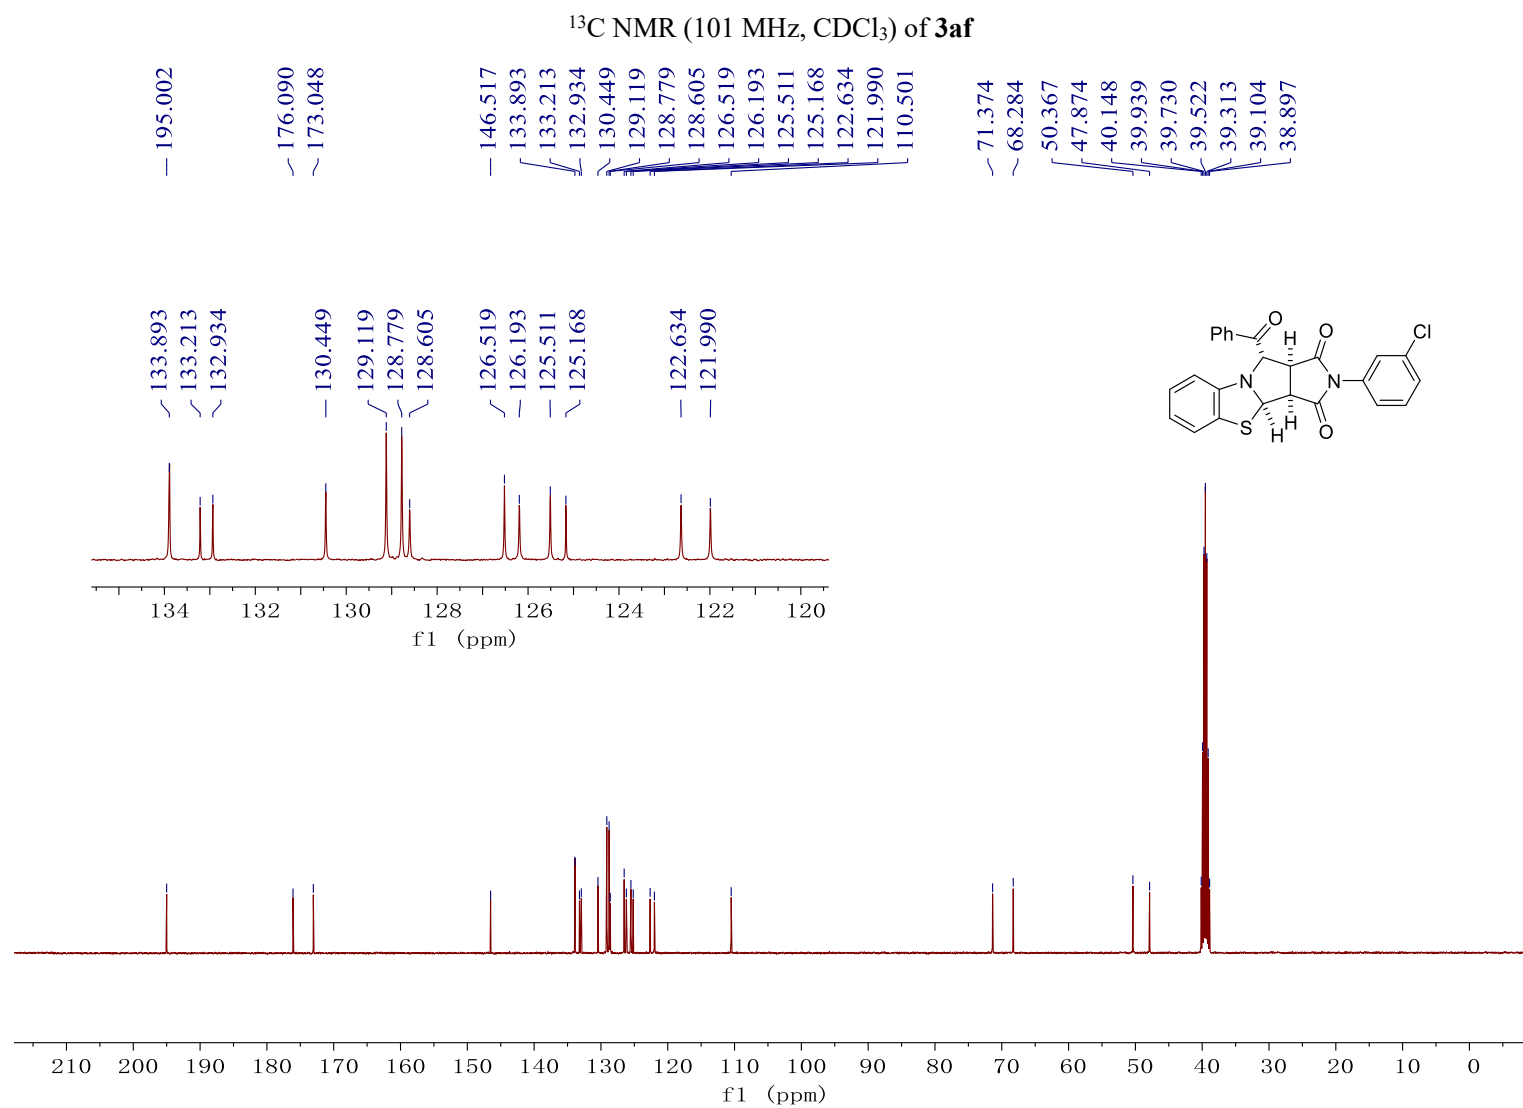



$^{13}\text{C}$  NMR (101 MHz,  $\text{CDCl}_3$ ) of **3ag**

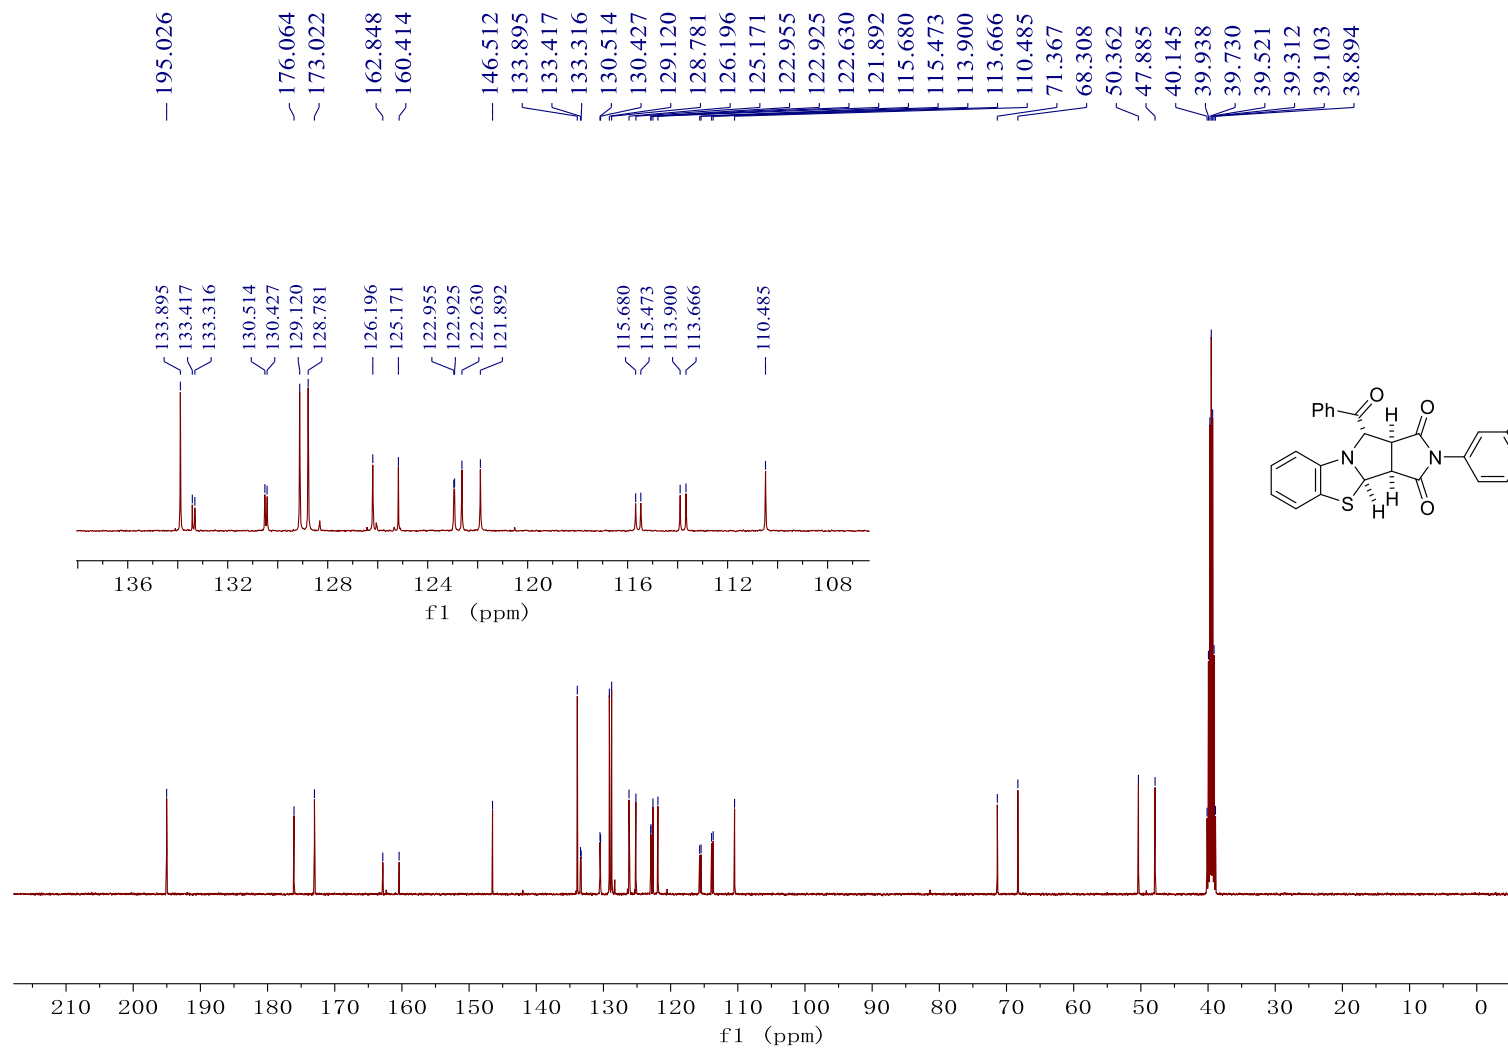

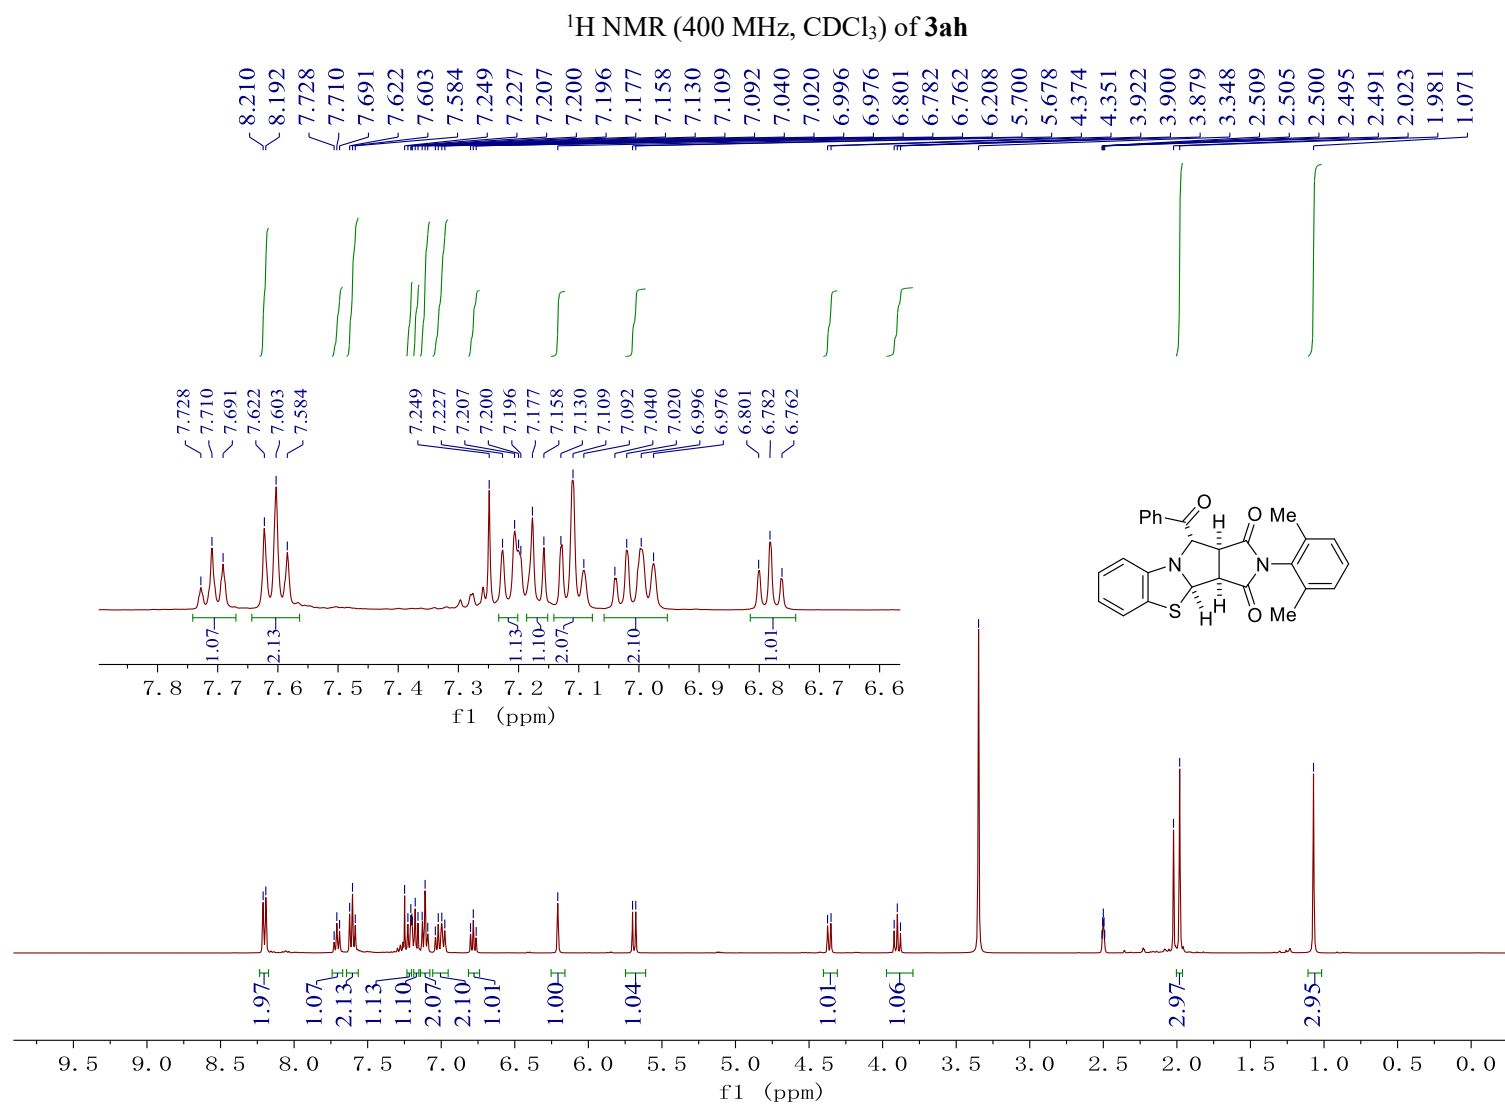

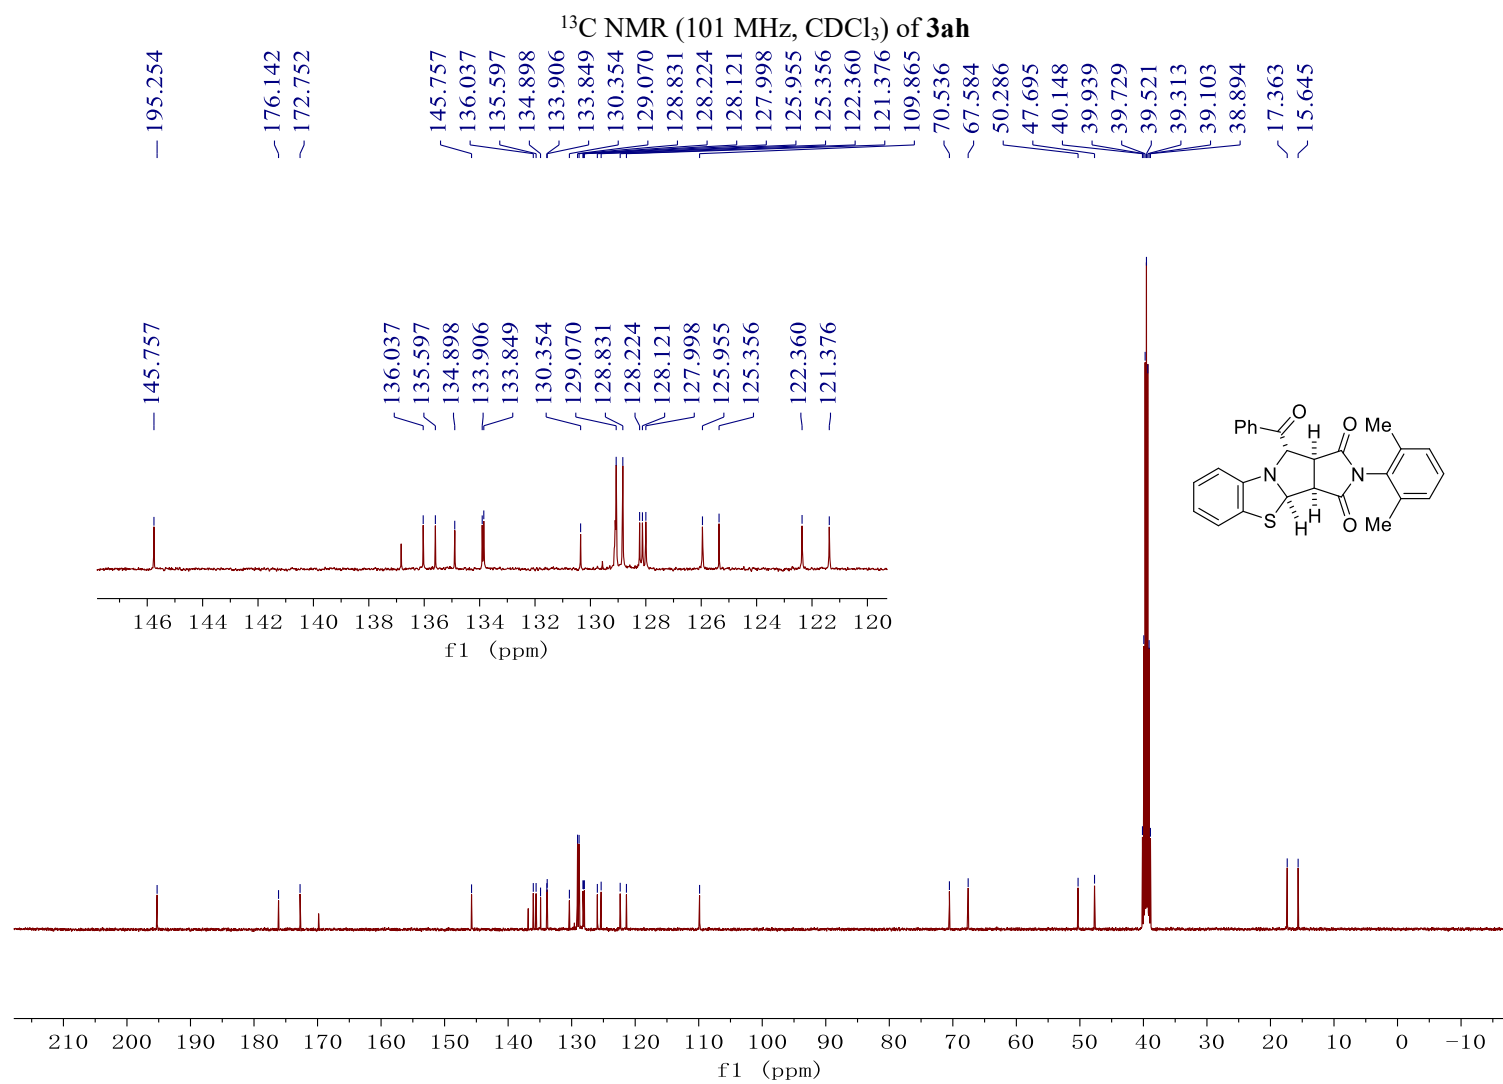

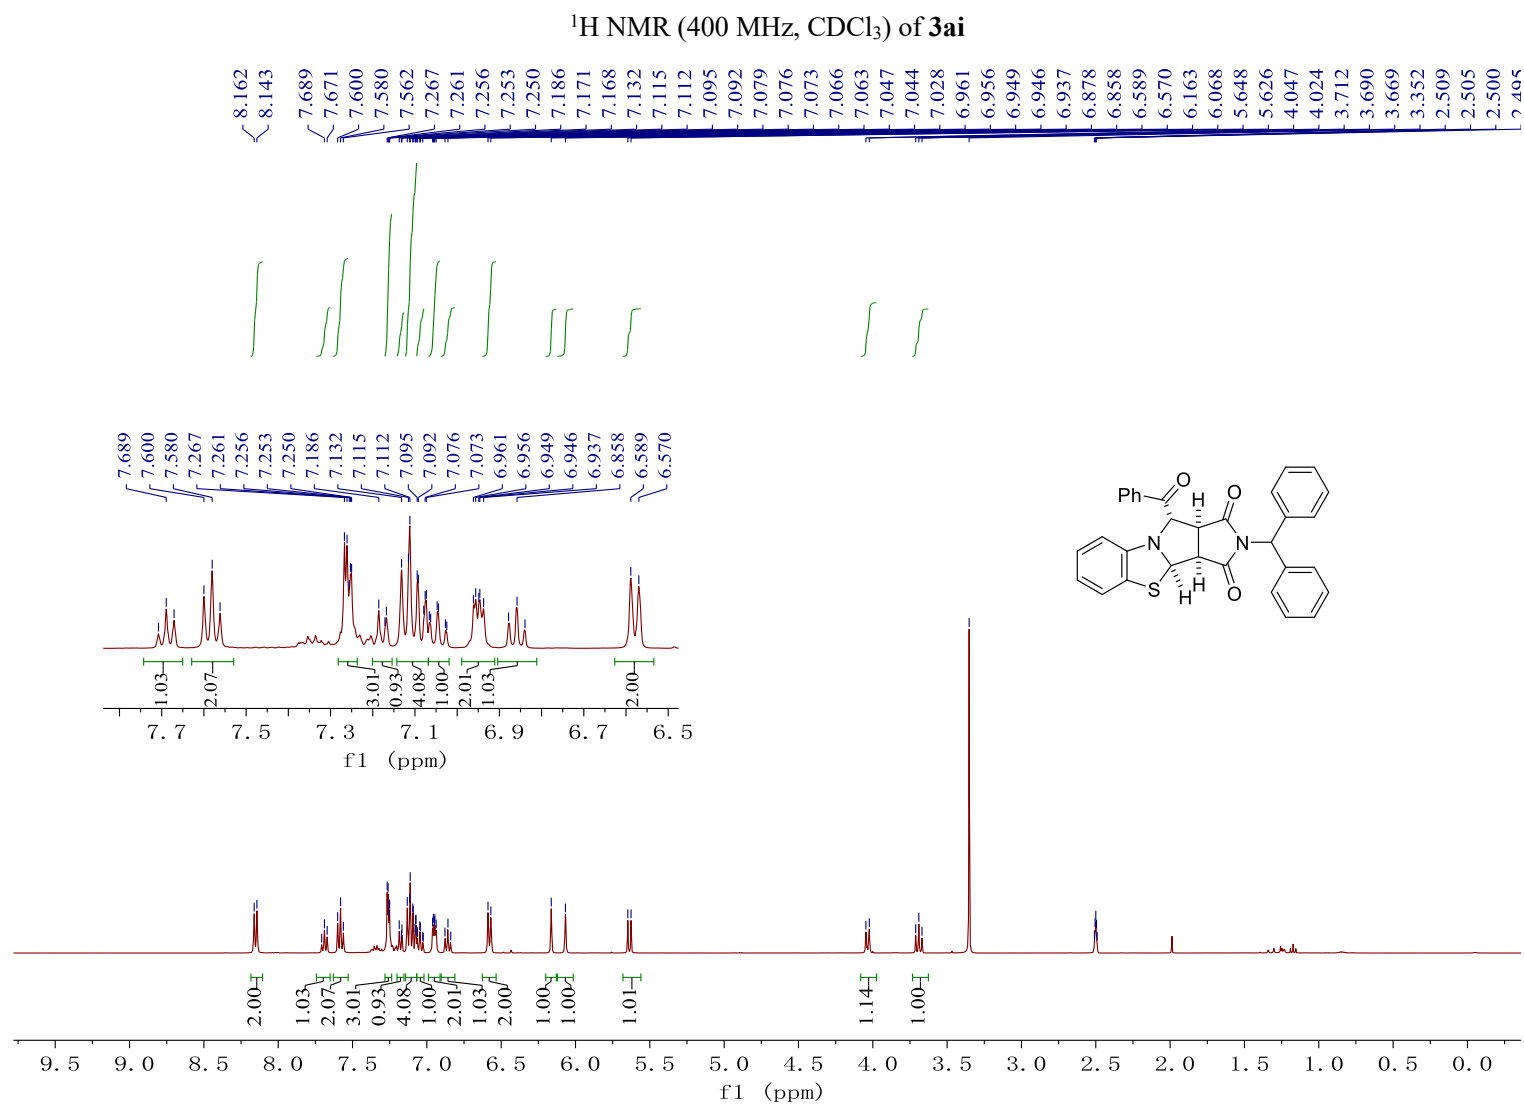

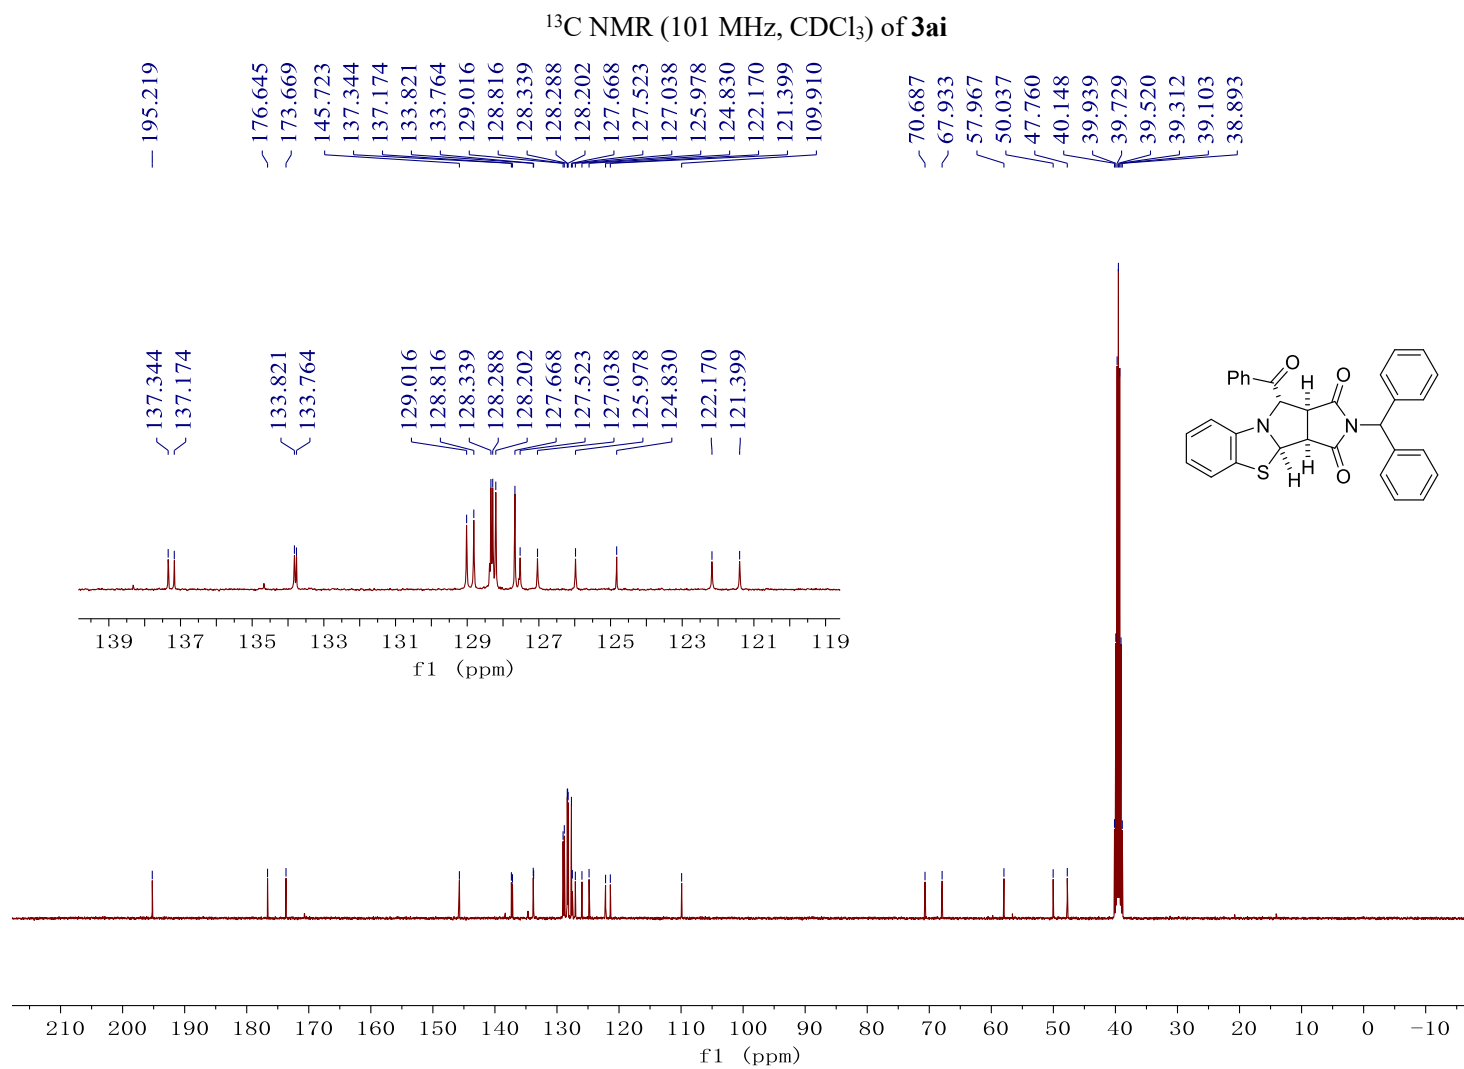



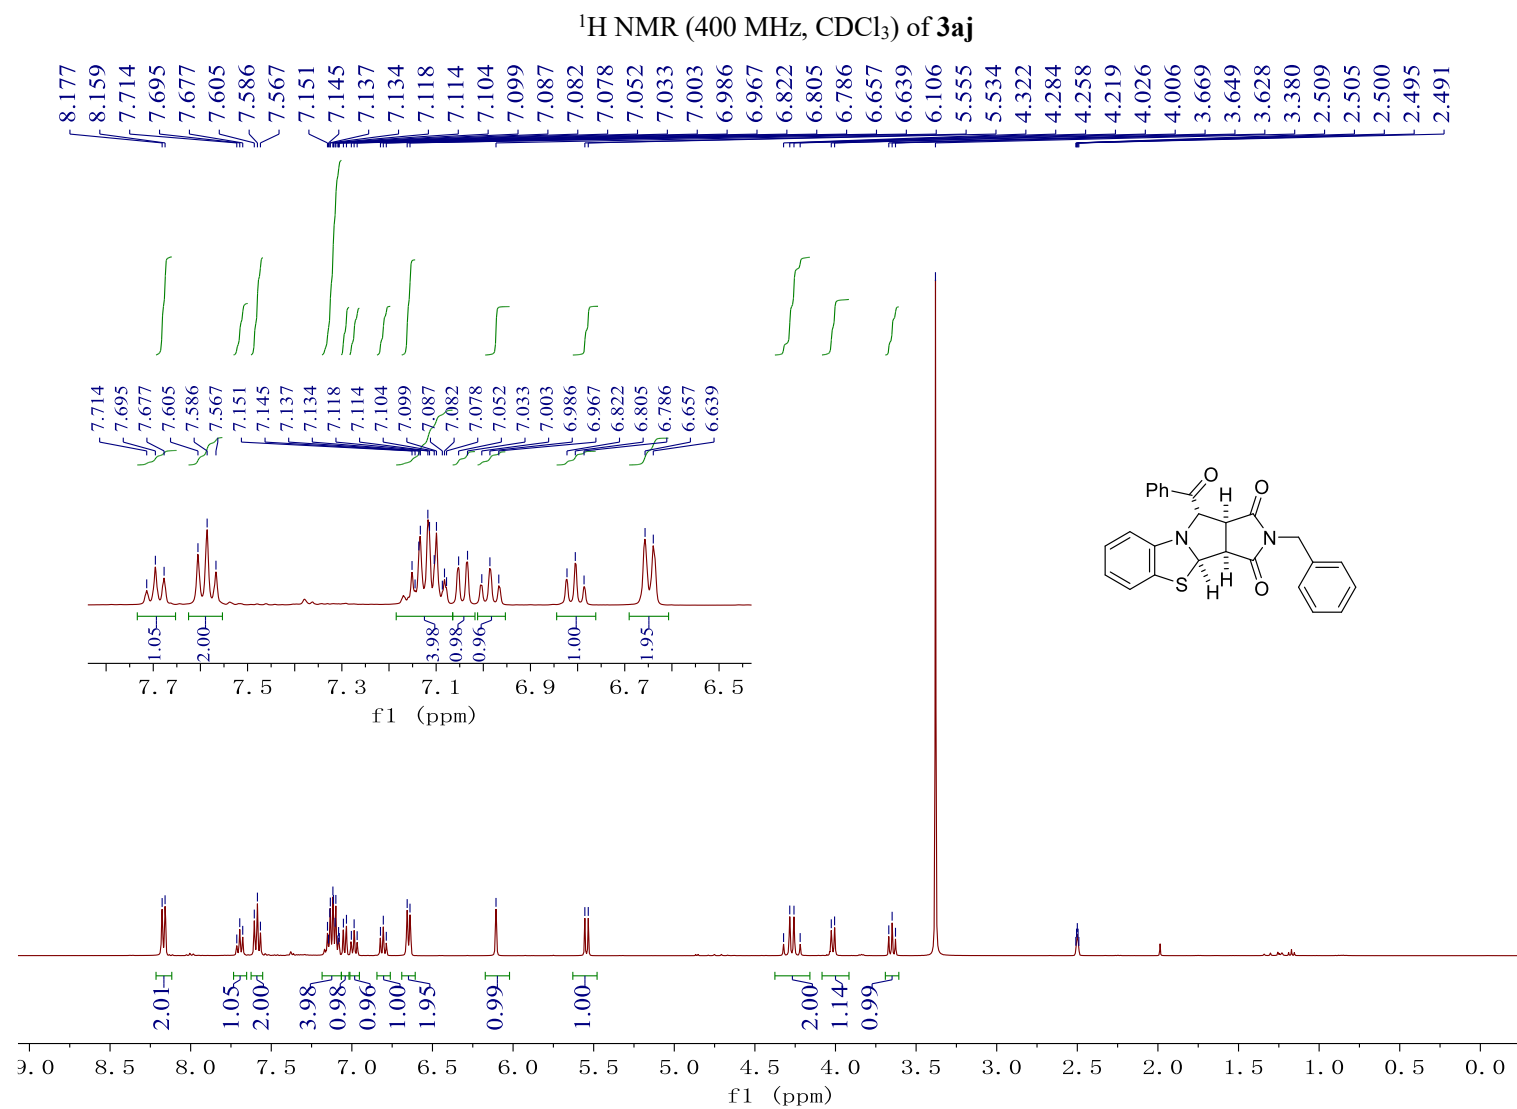

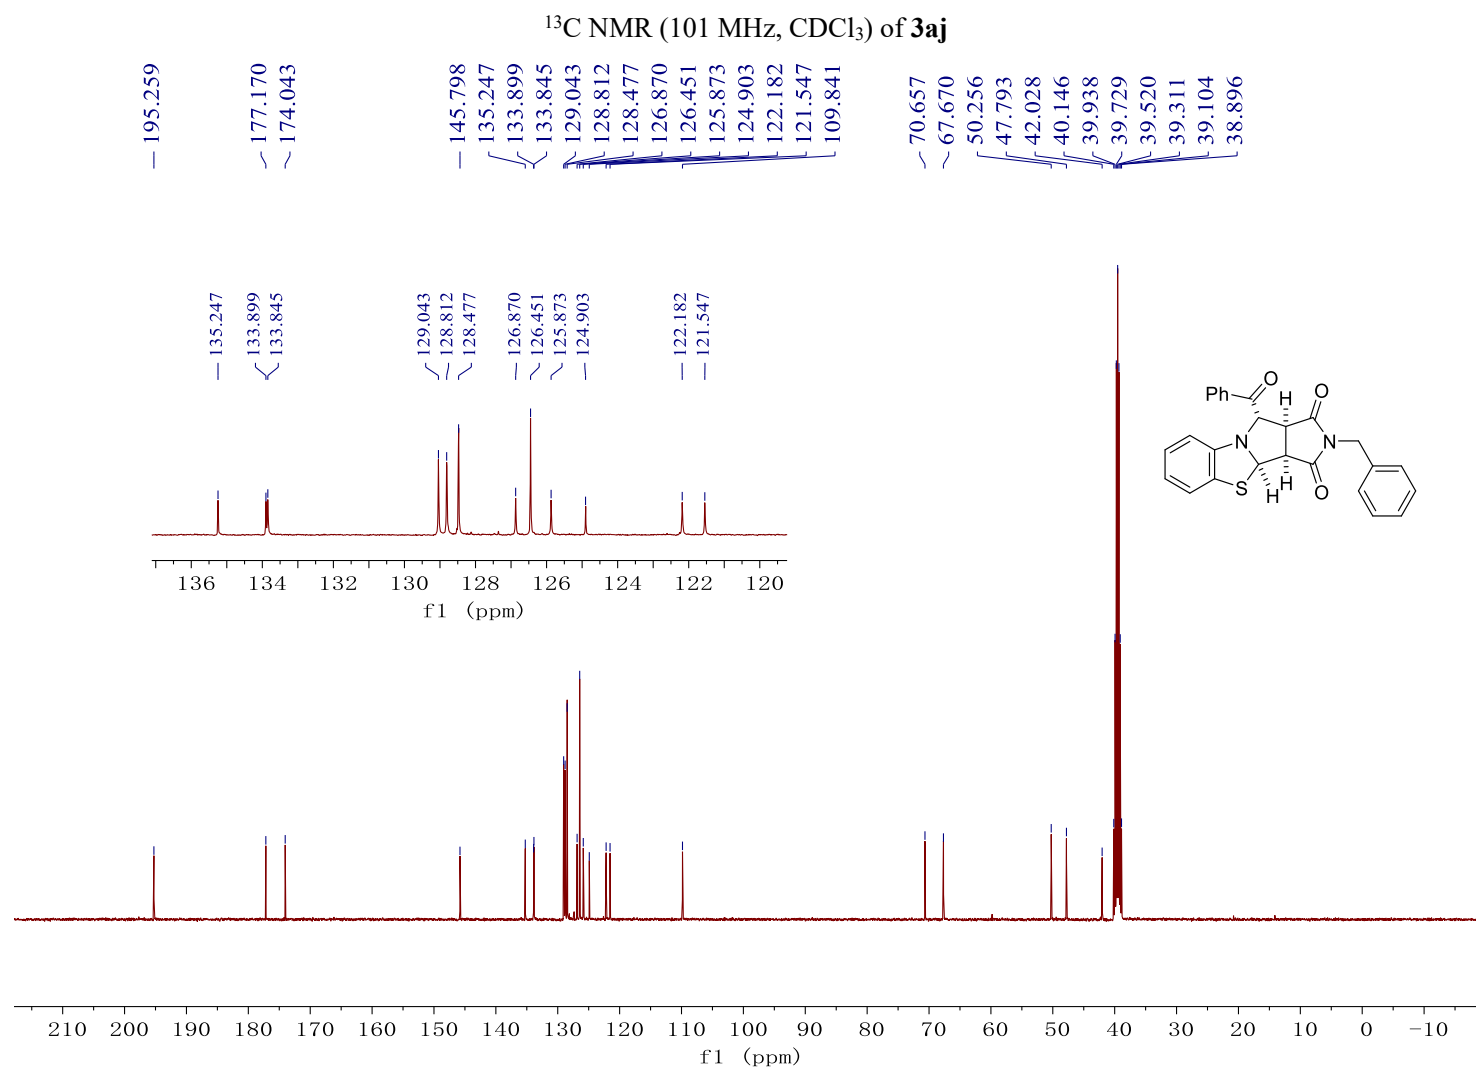

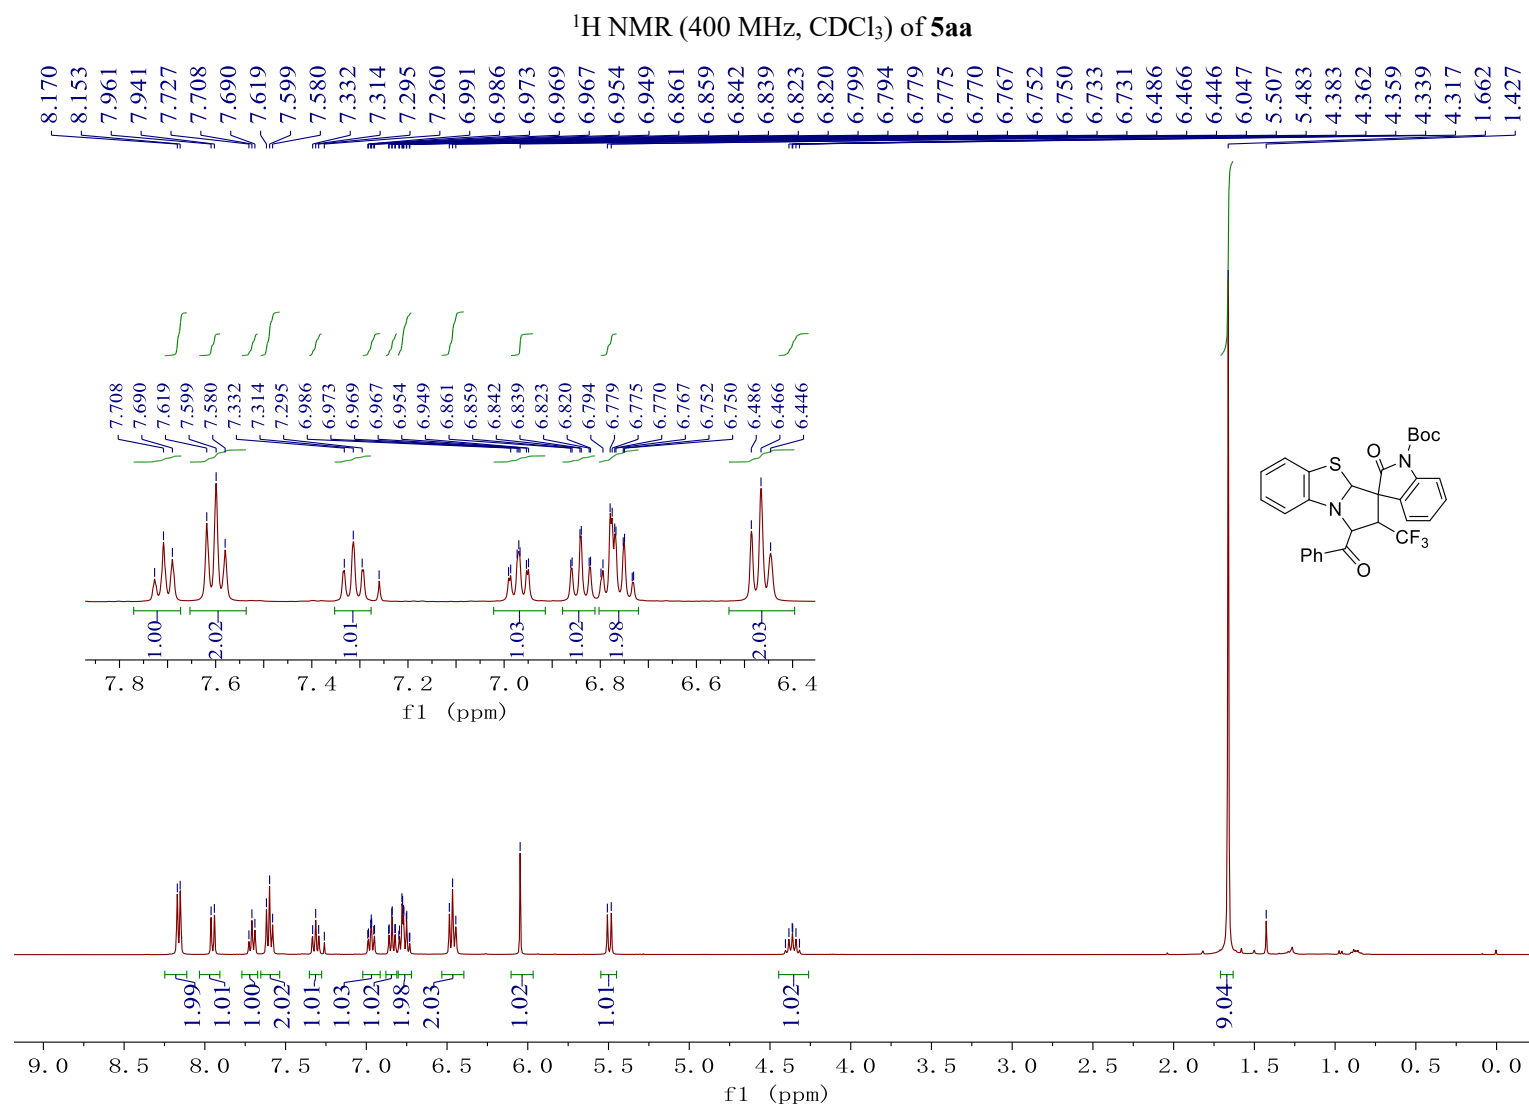

$^{13}\text{C}$  NMR (101 MHz,  $\text{CDCl}_3$ ) of **5aa**

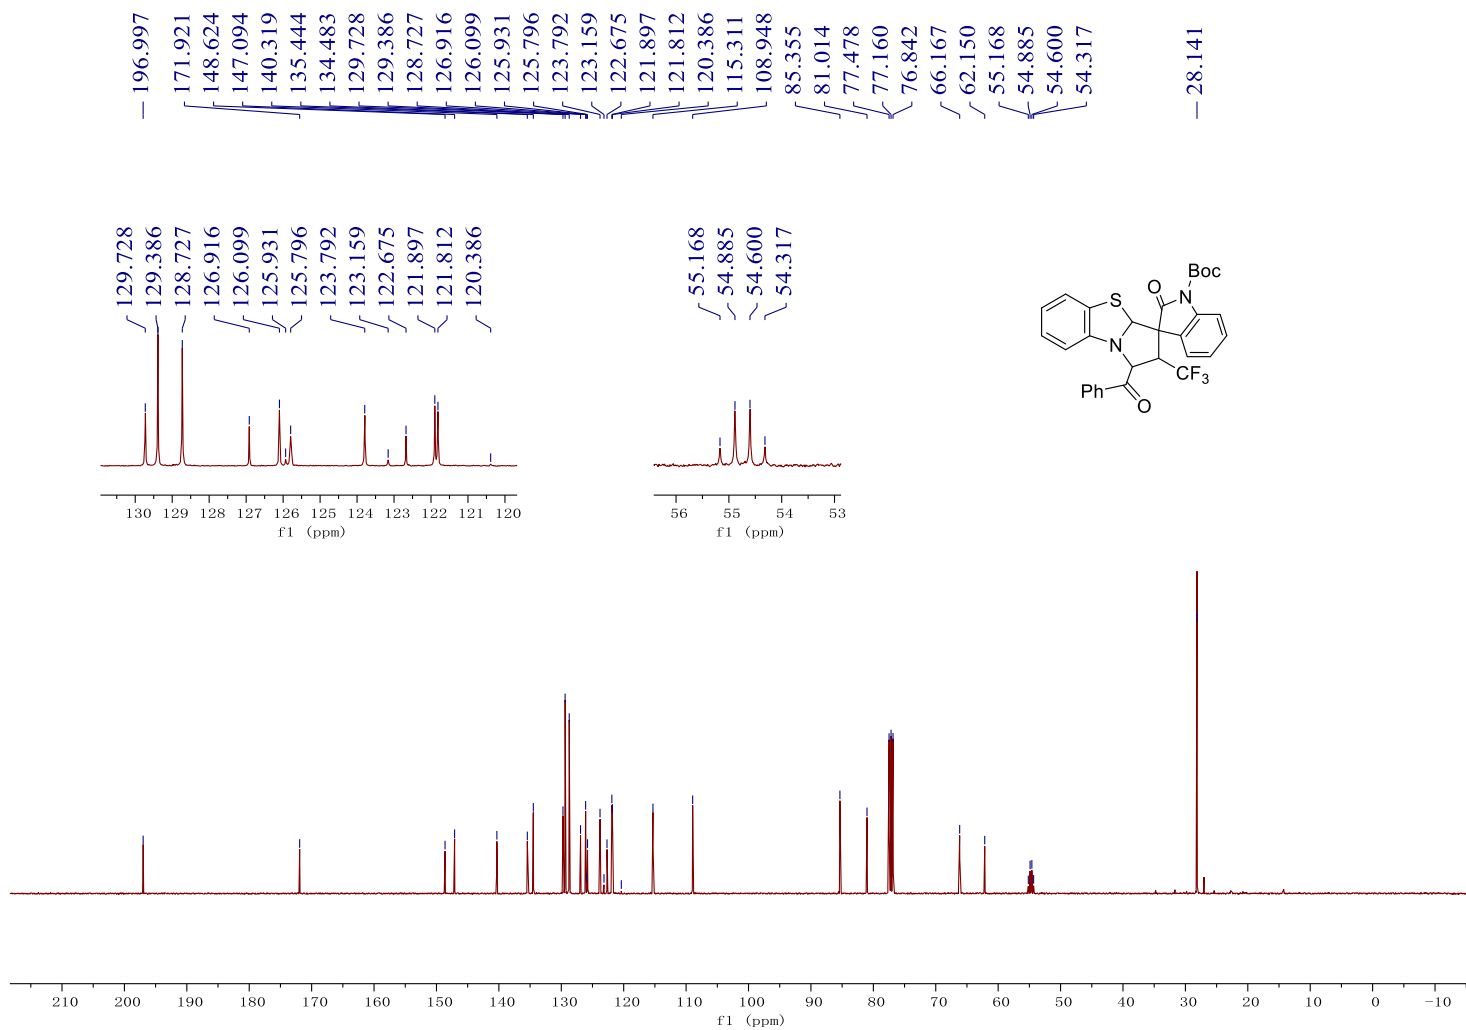

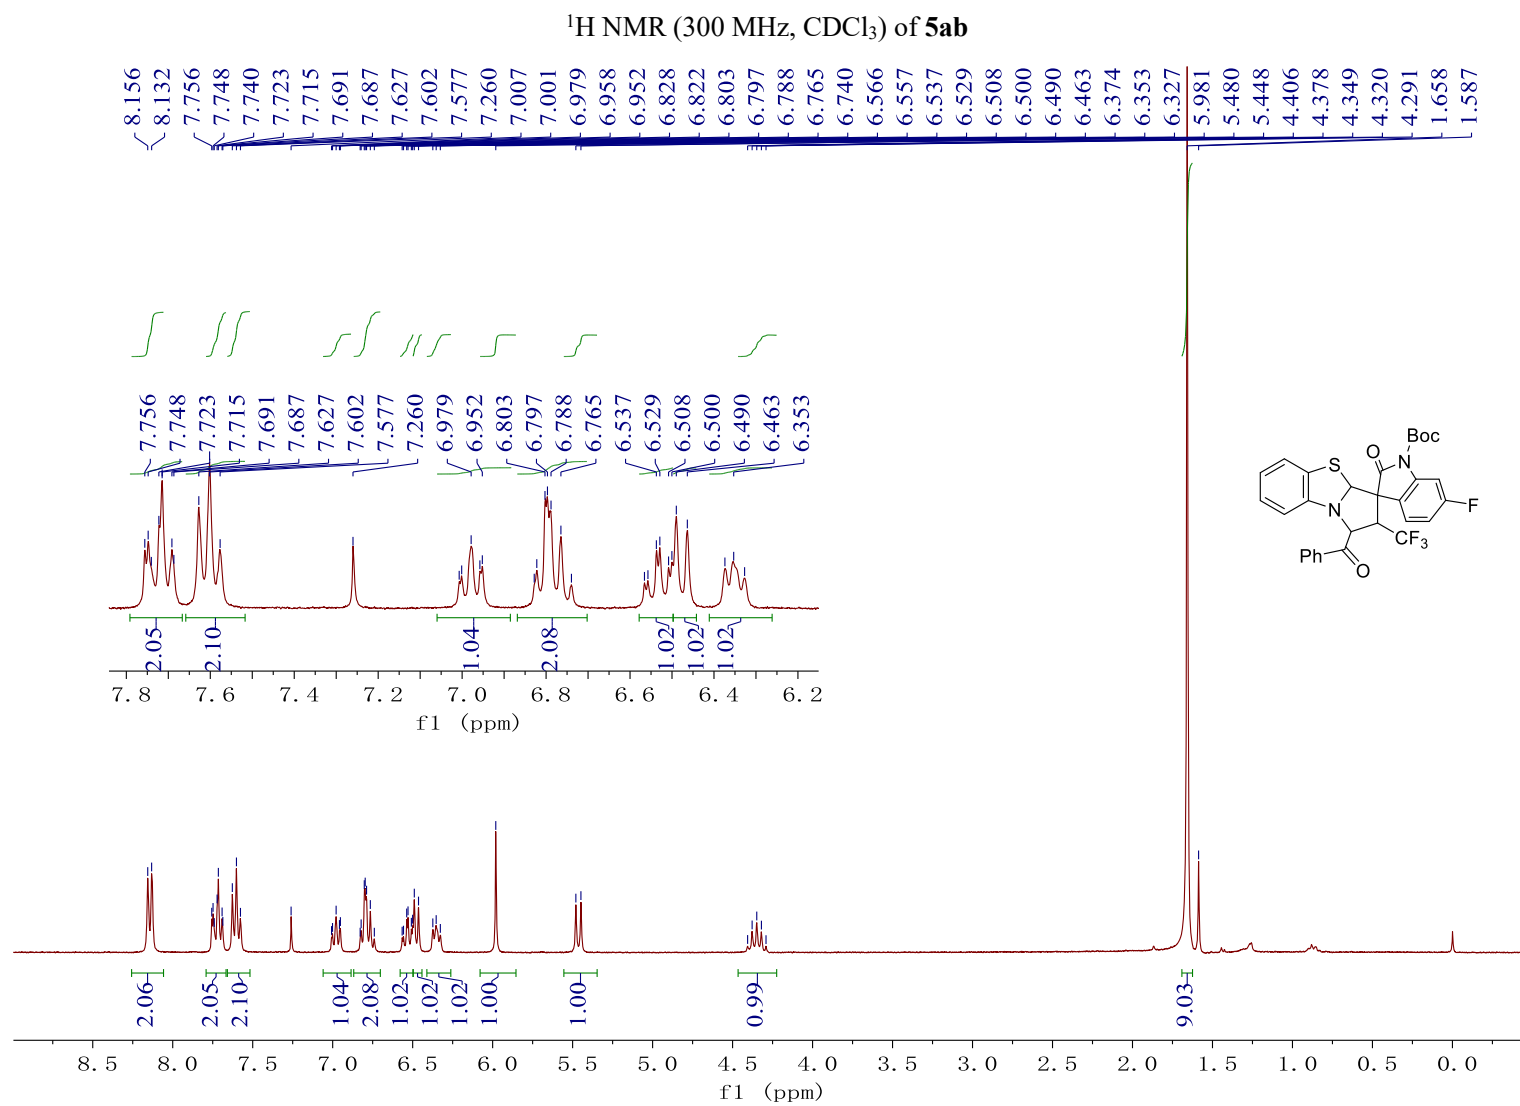

$^{13}\text{C}$  NMR (75 MHz,  $\text{CDCl}_3$ ) of **5ab**

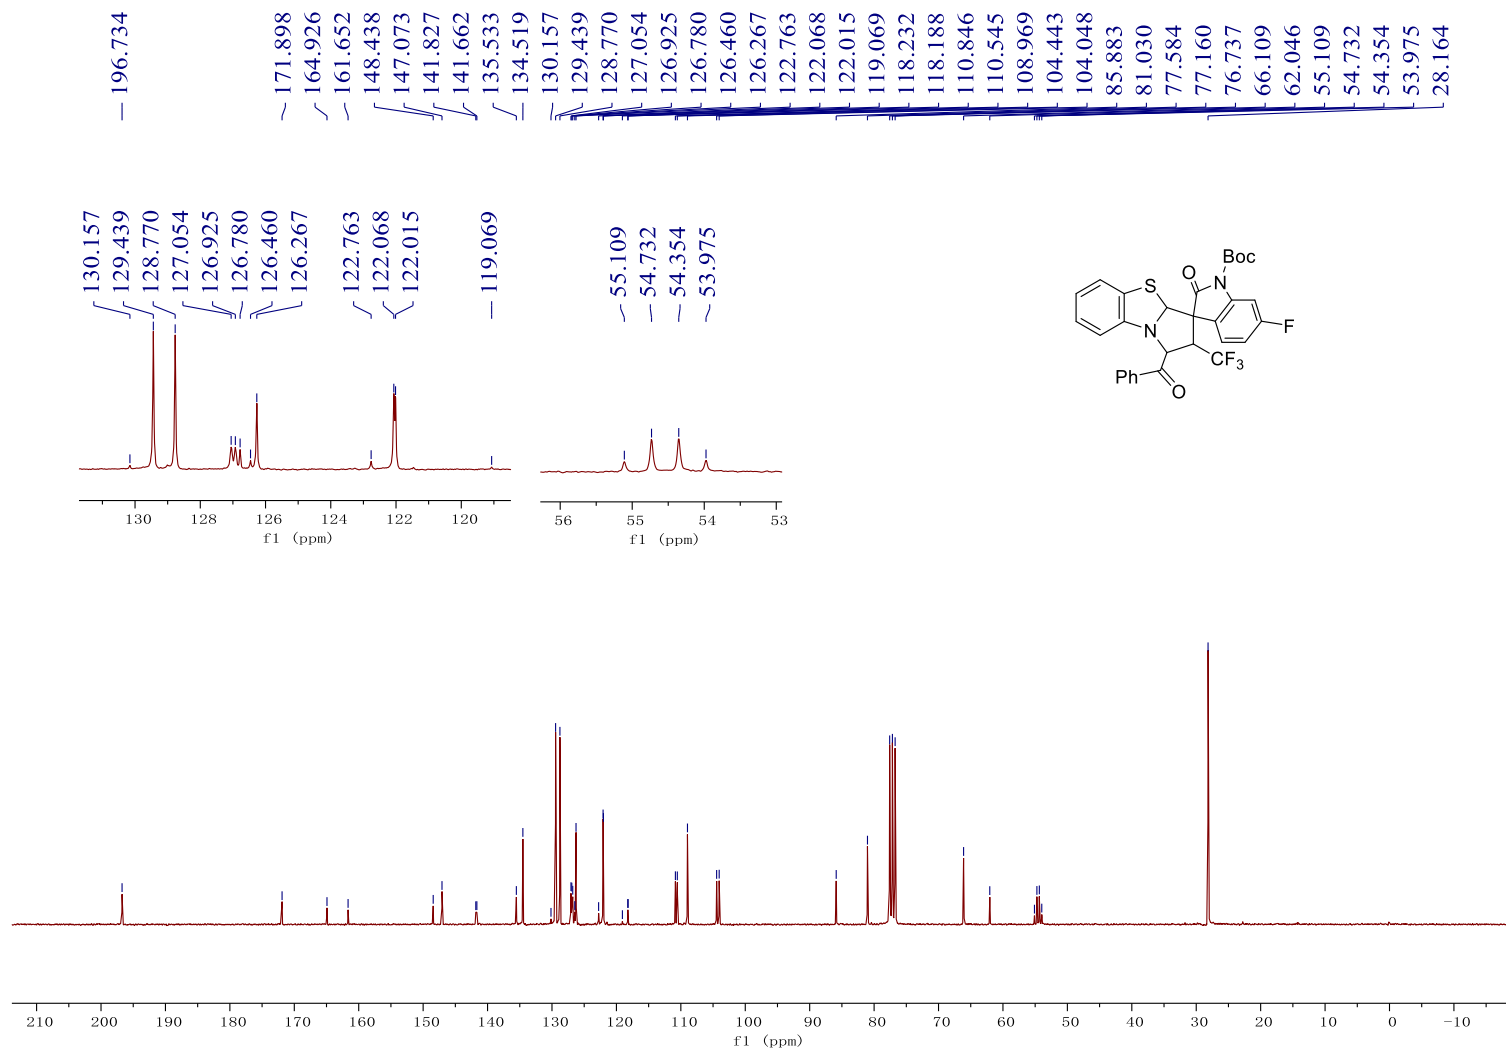

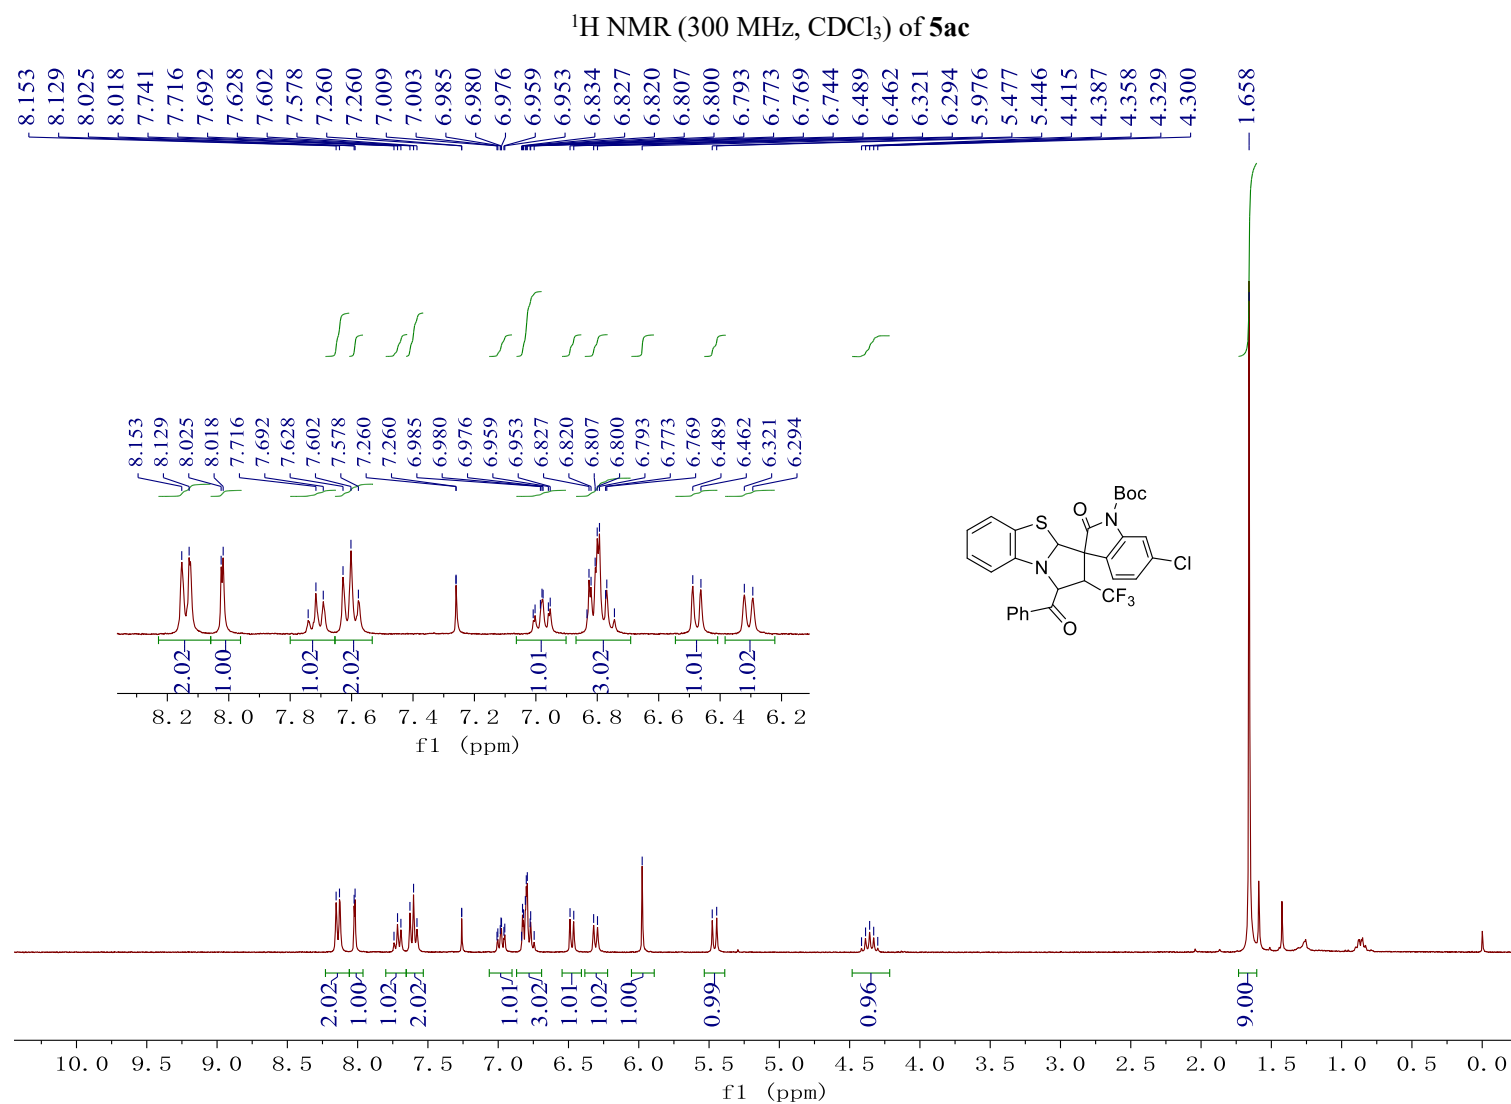

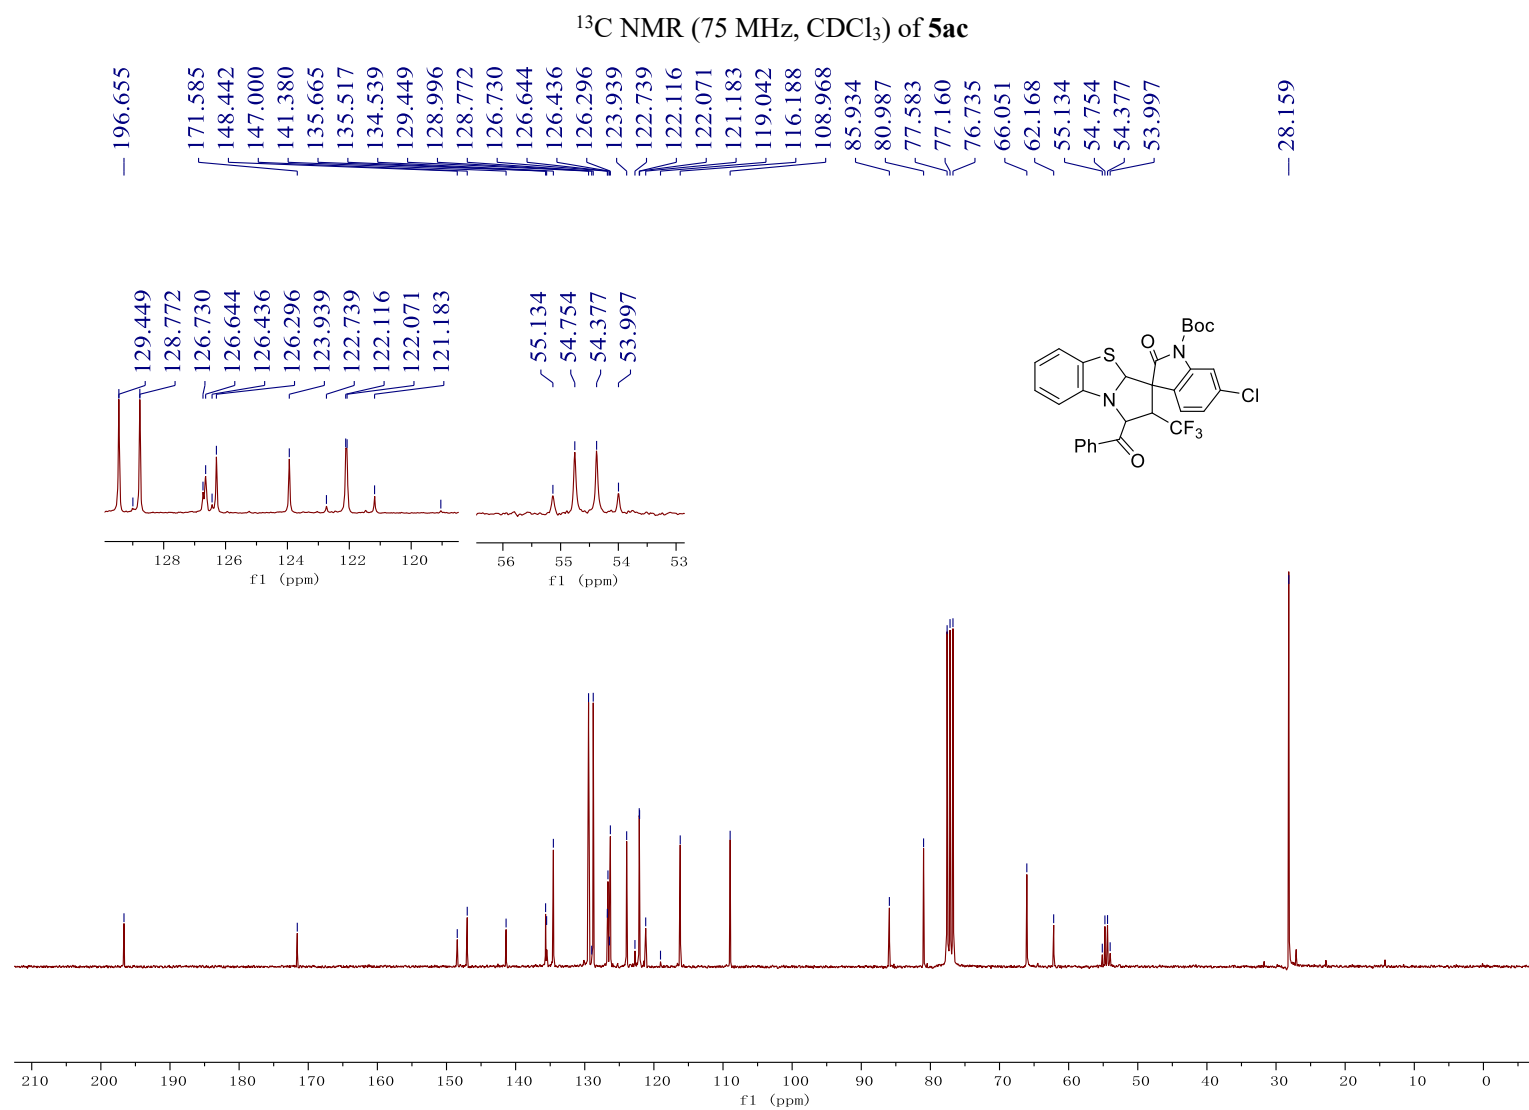



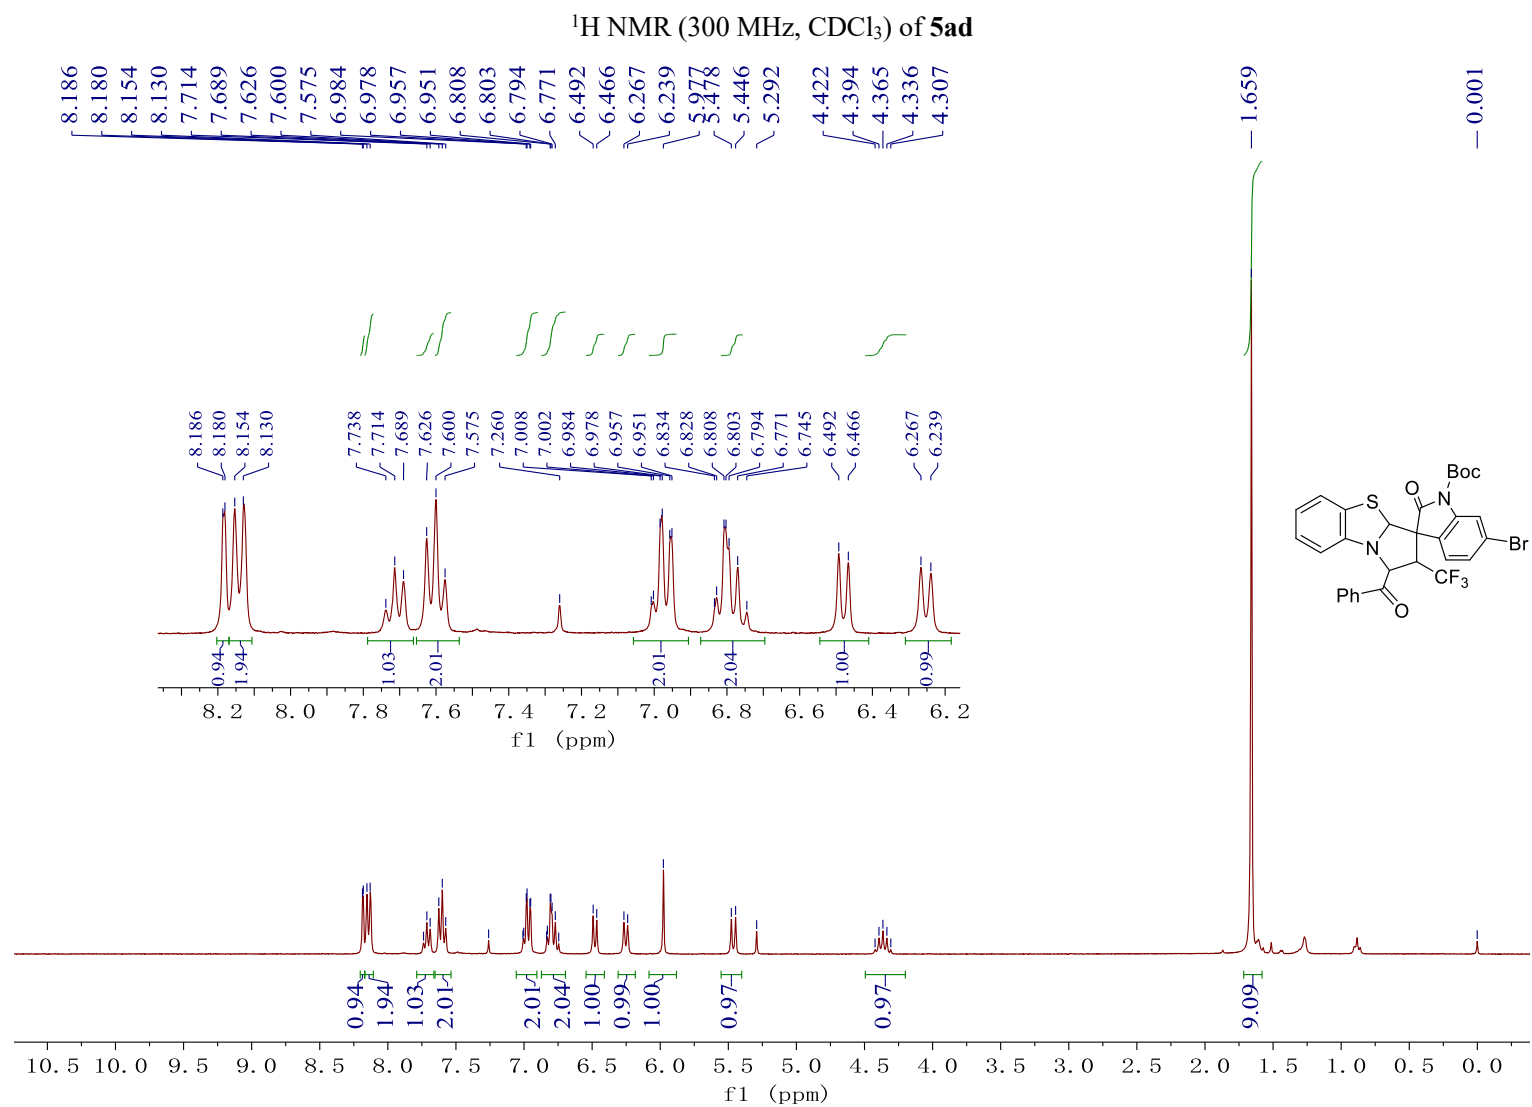

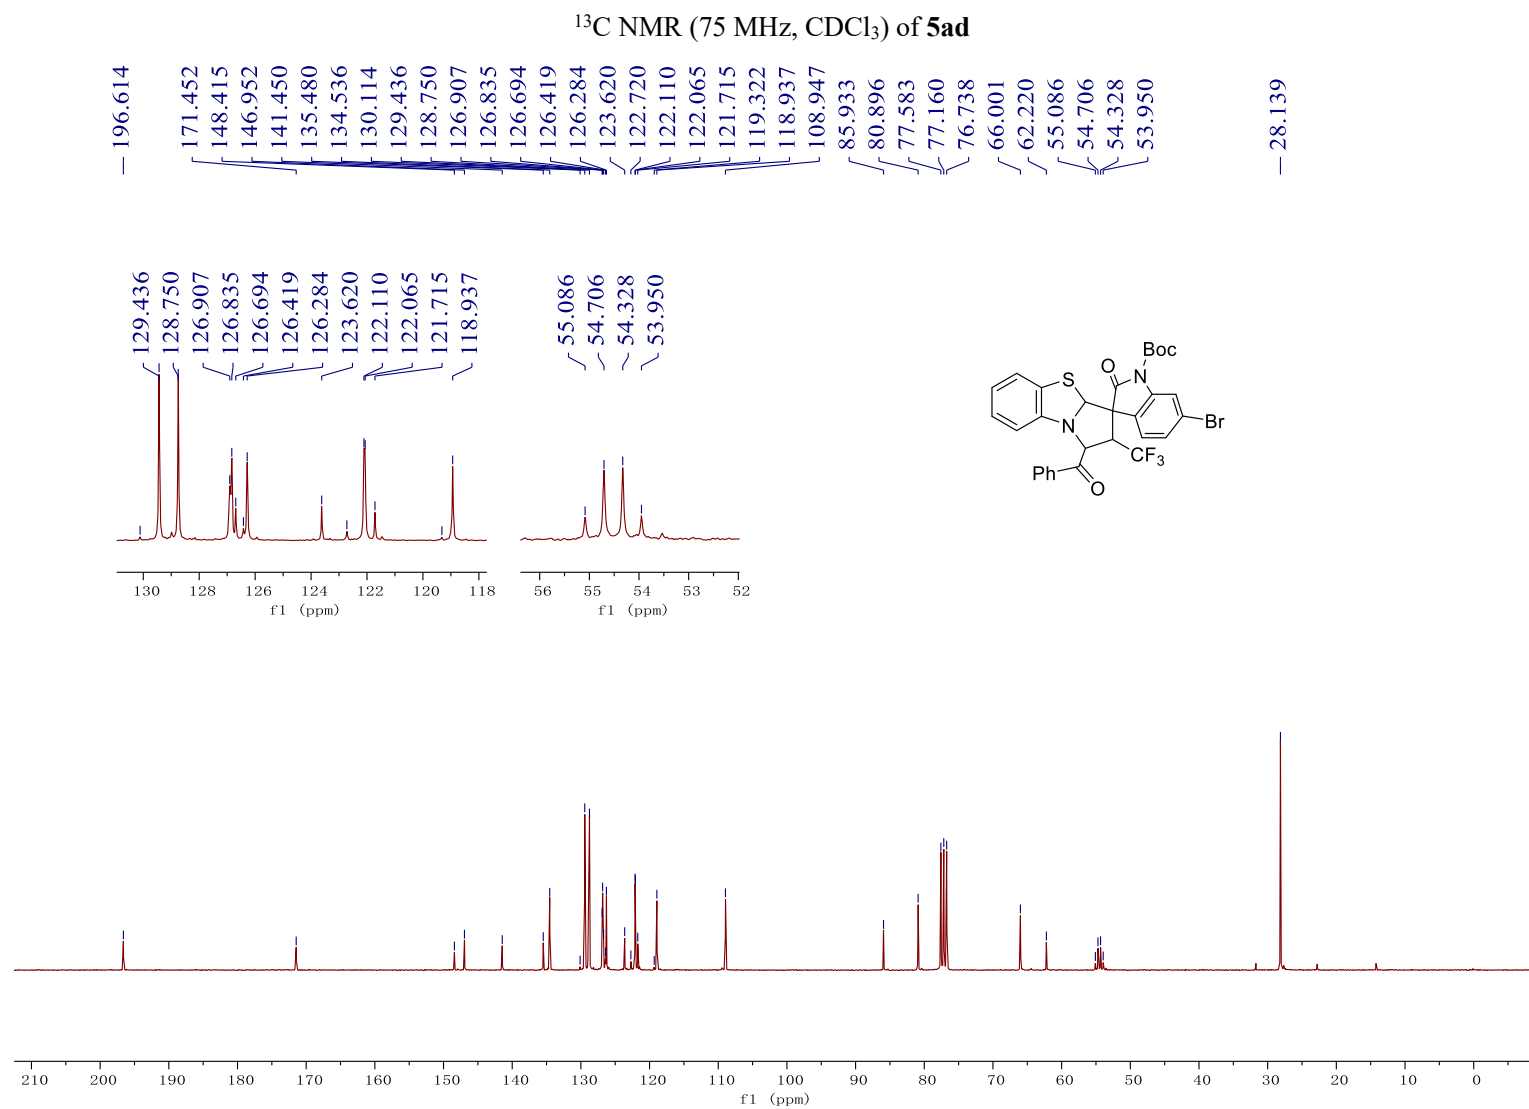

<sup>1</sup>H NMR (300 MHz, CDCl<sub>3</sub>) of **5ae**

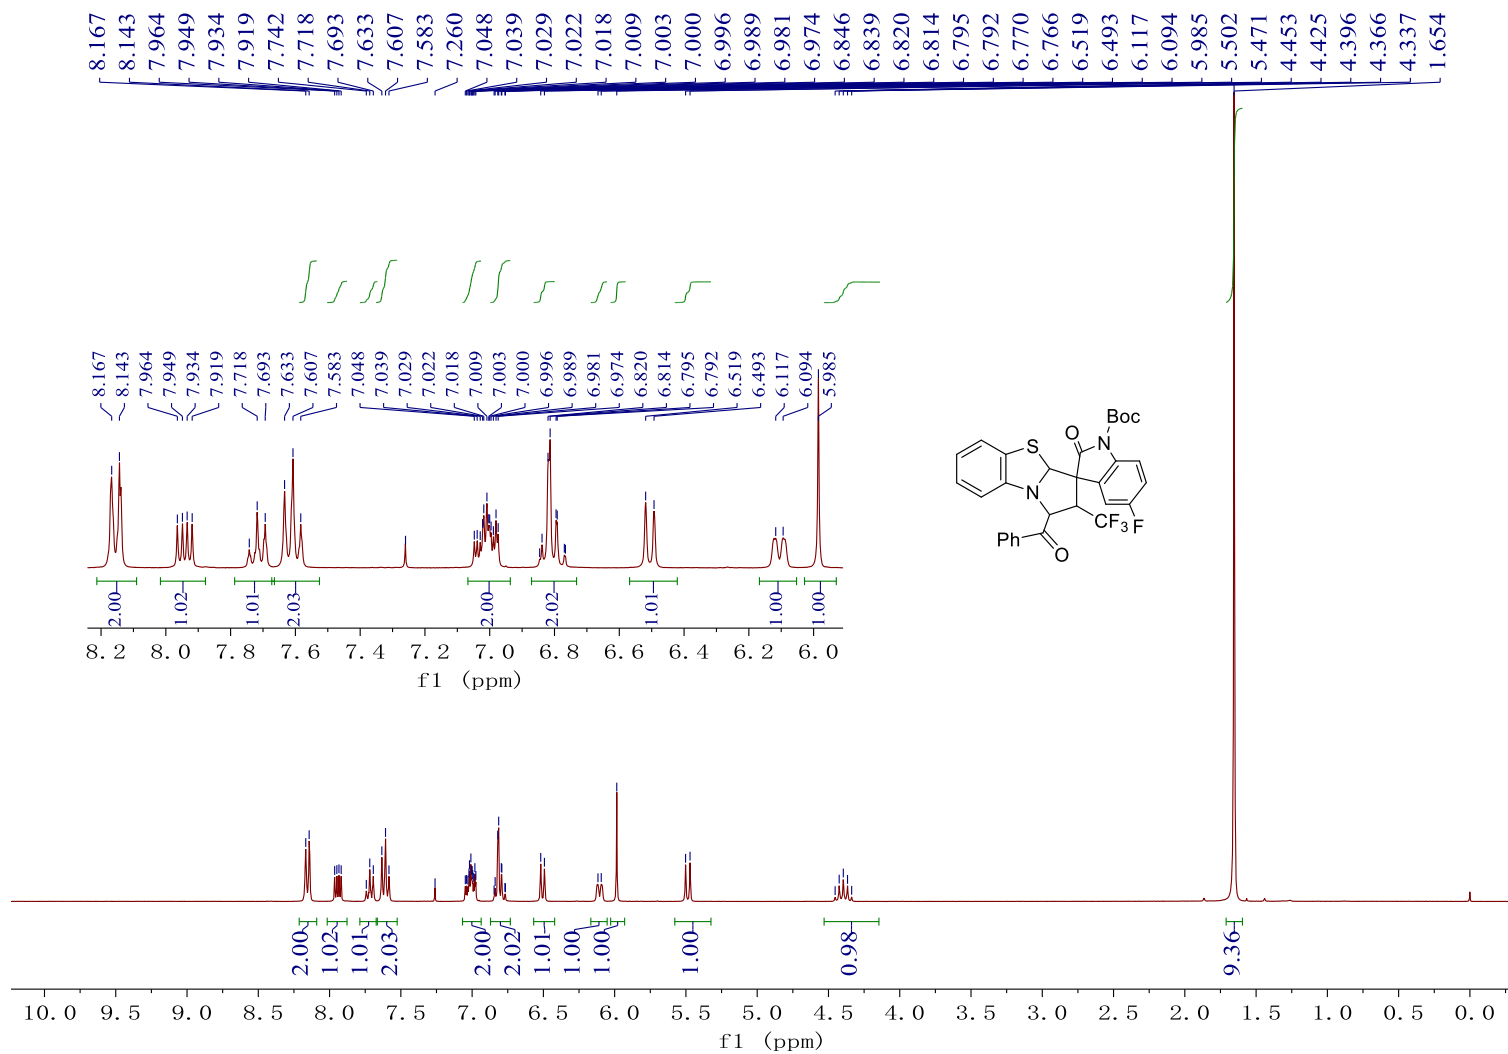

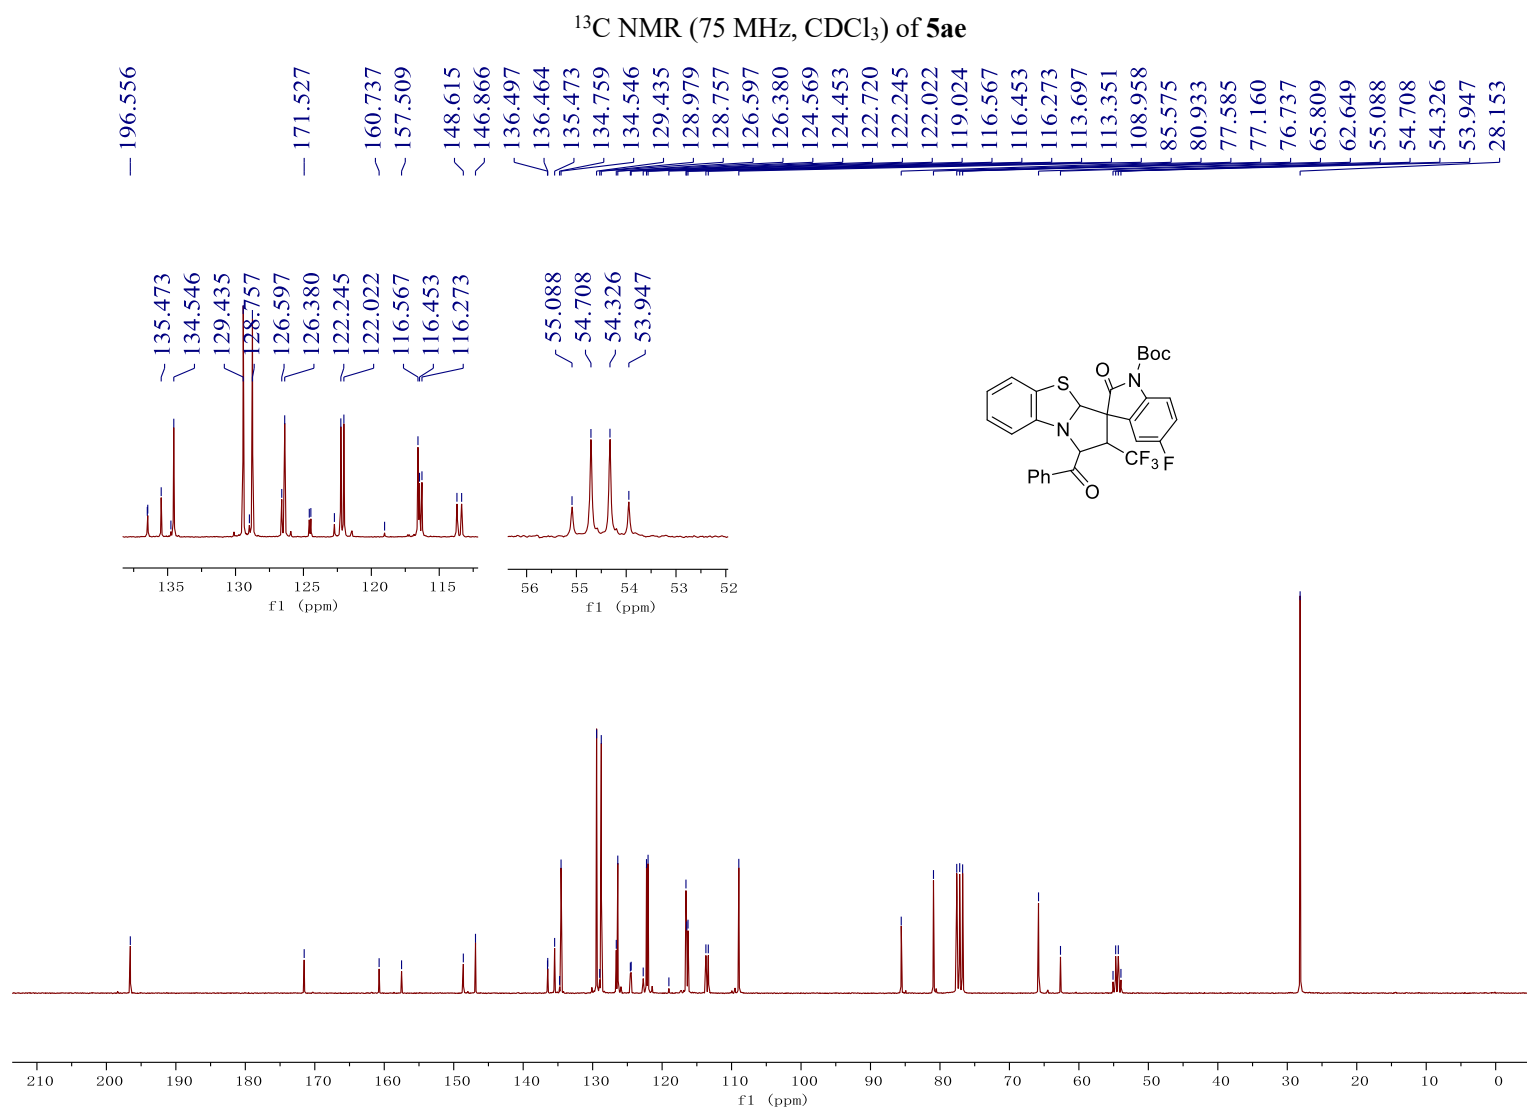

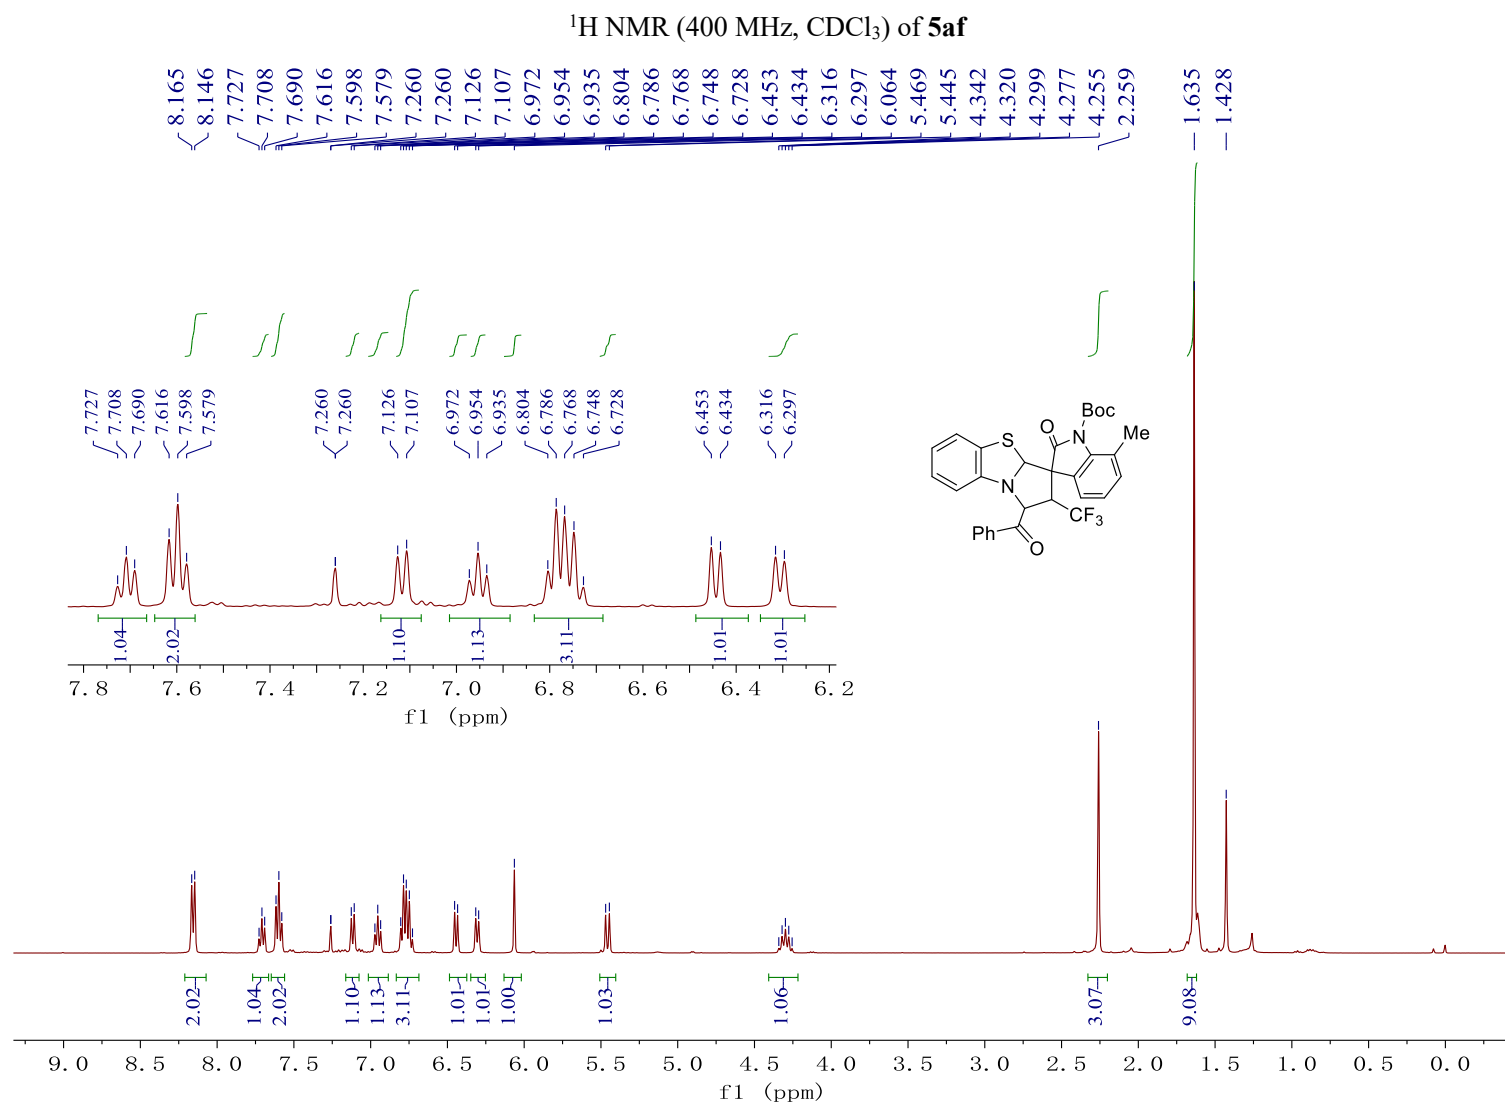

<sup>13</sup>C NMR (101 MHz, CDCl<sub>3</sub>) of **5af**

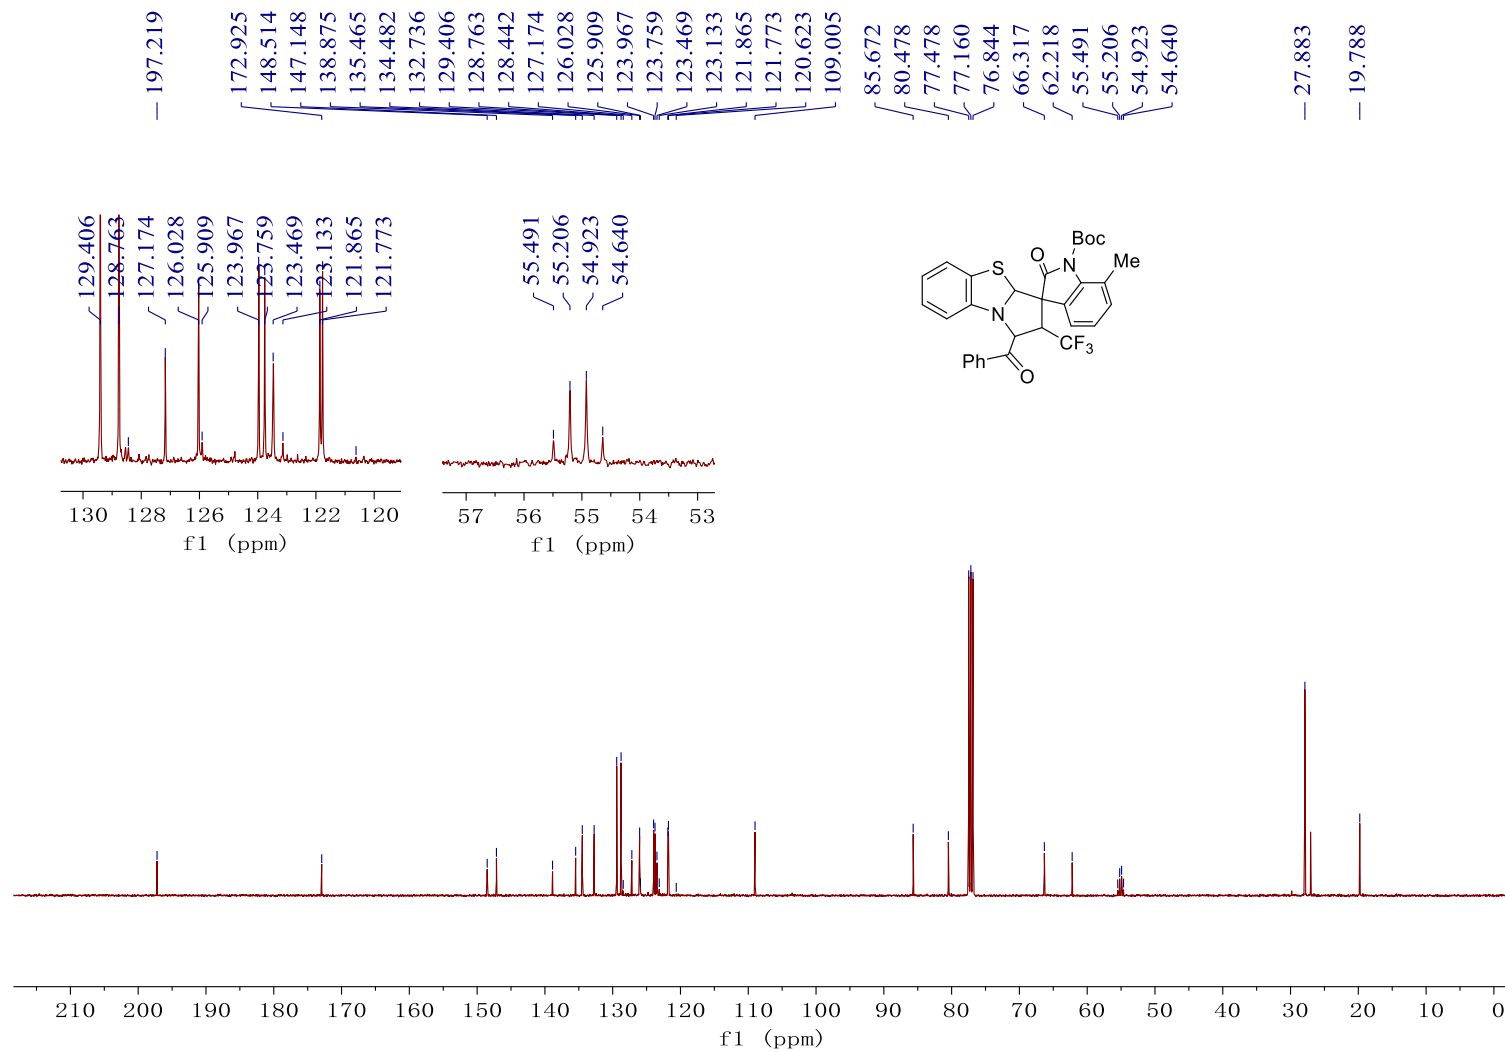

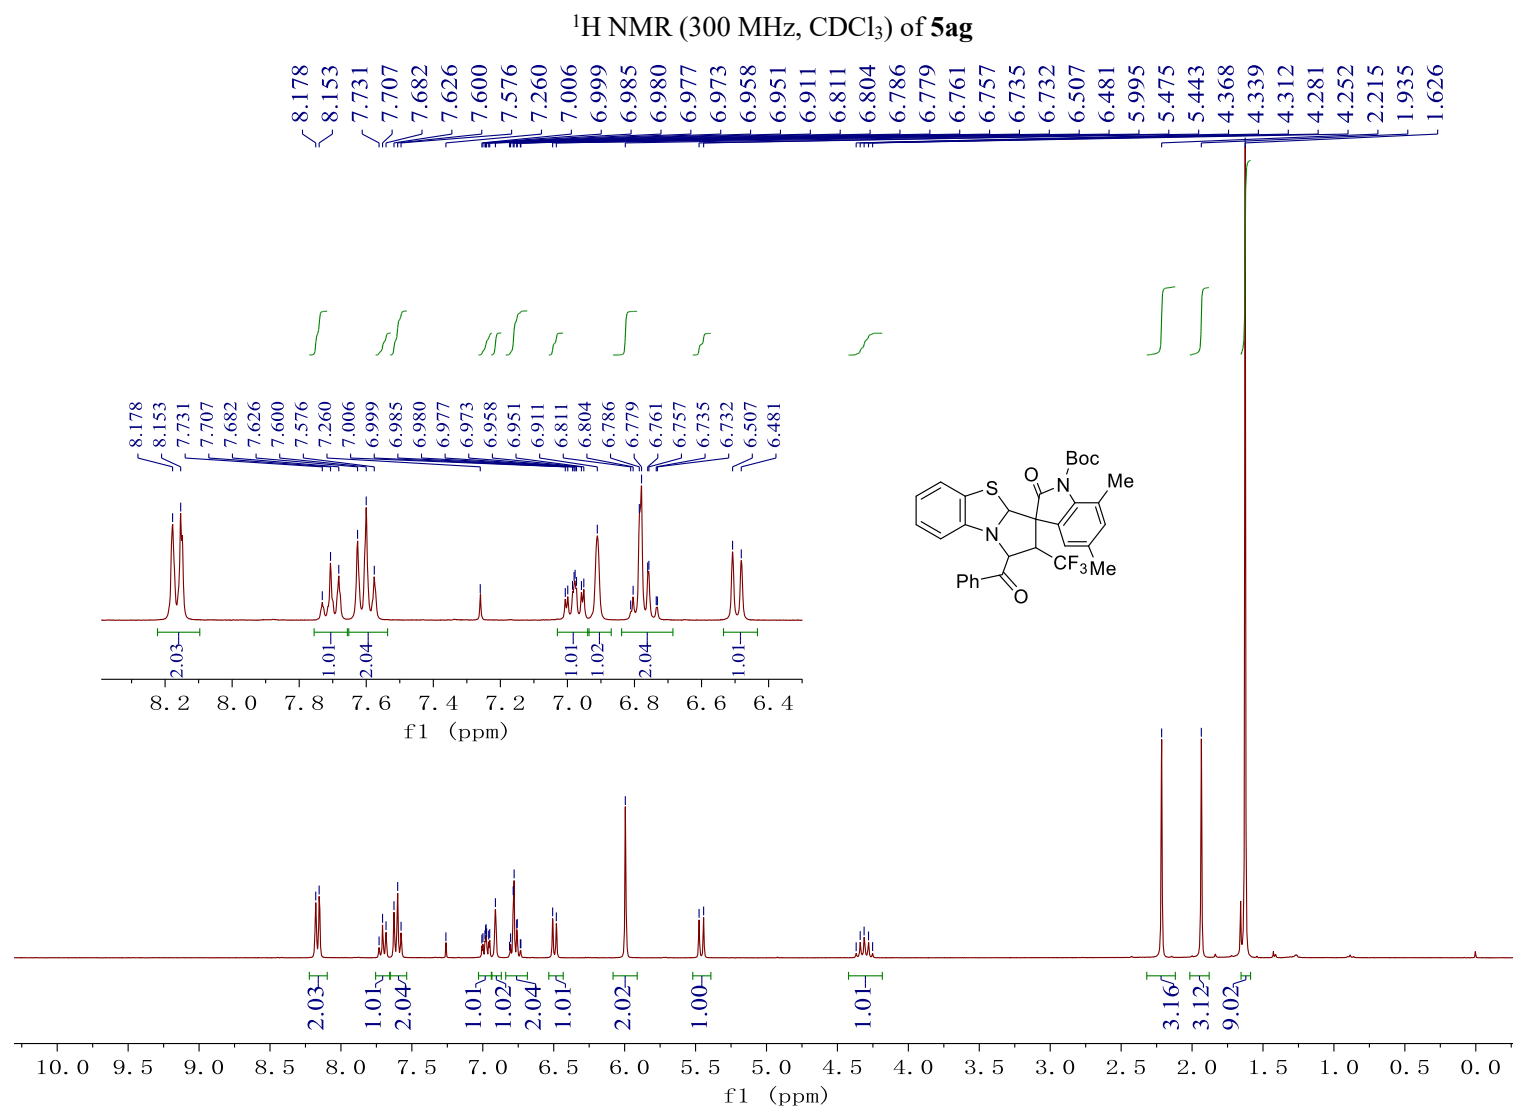

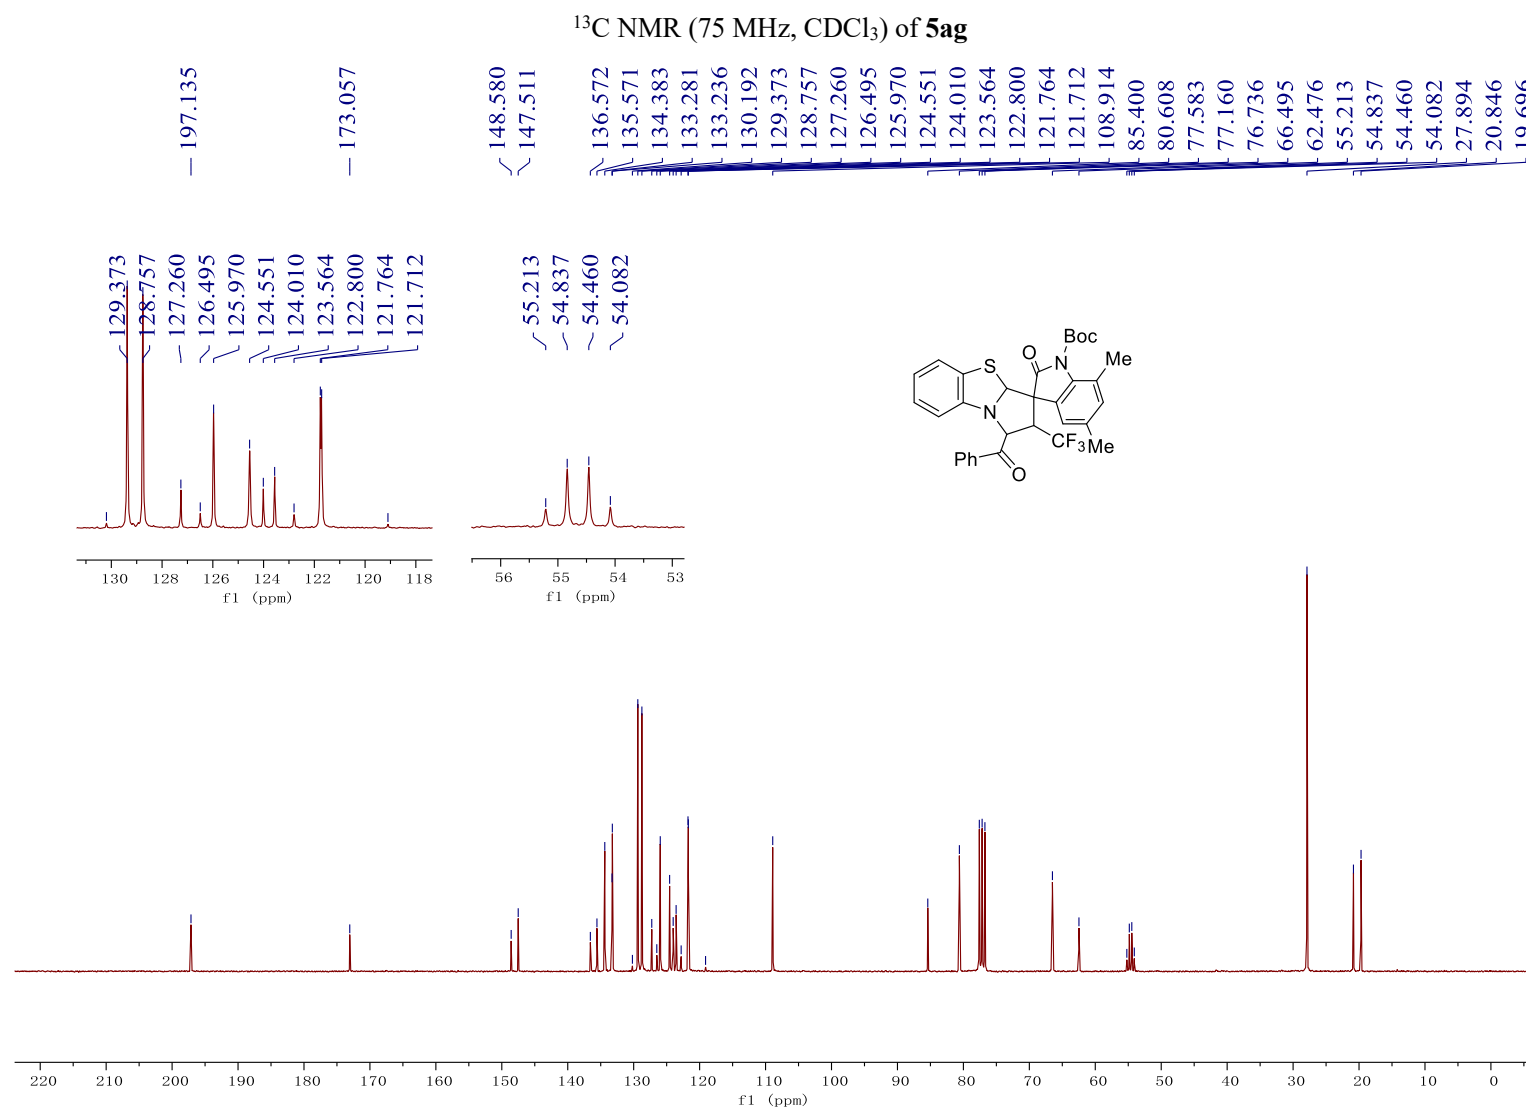



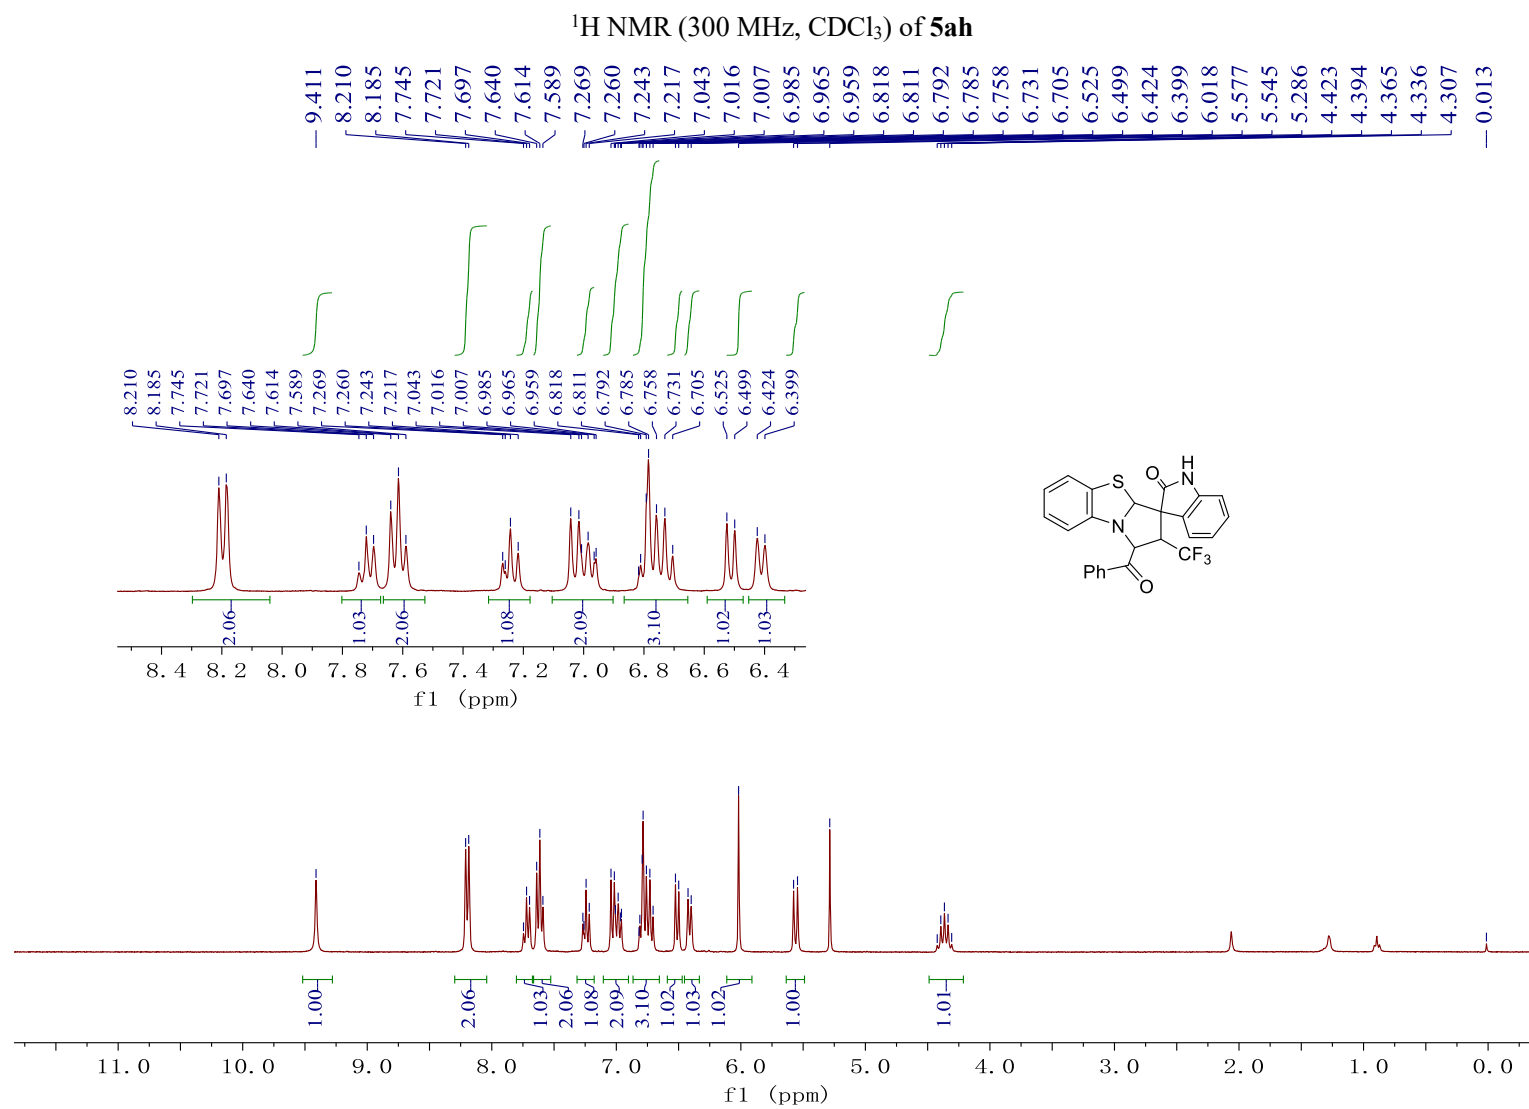

$^{13}\text{C}$  NMR (75 MHz,  $\text{CDCl}_3$ ) of **5ah**

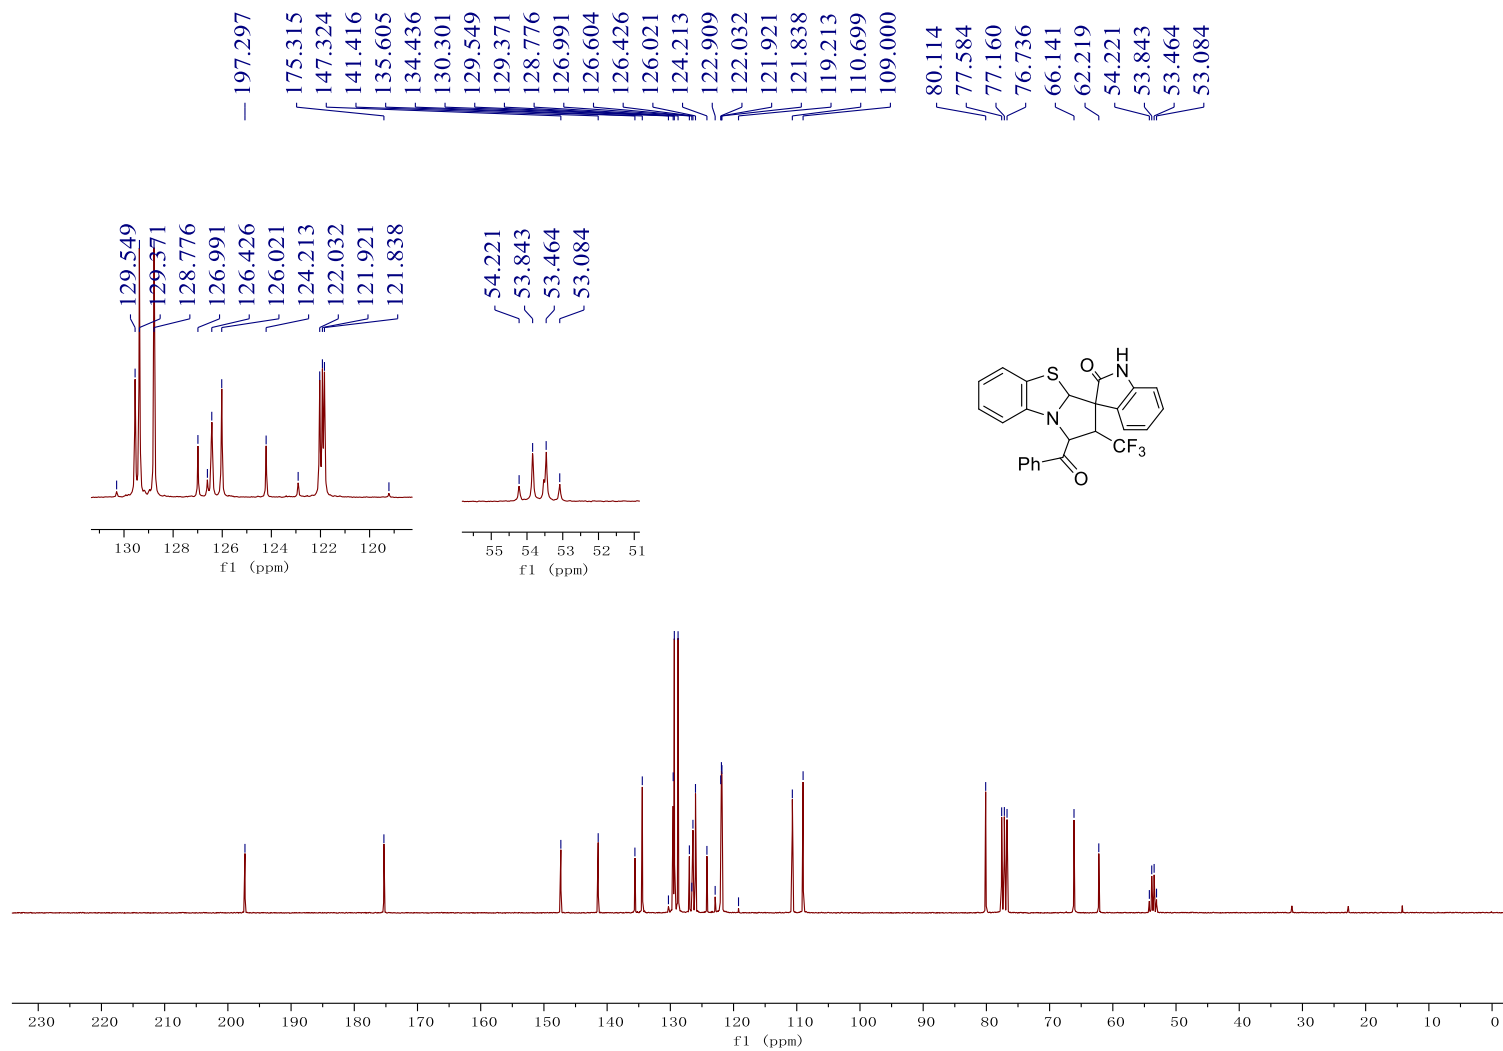

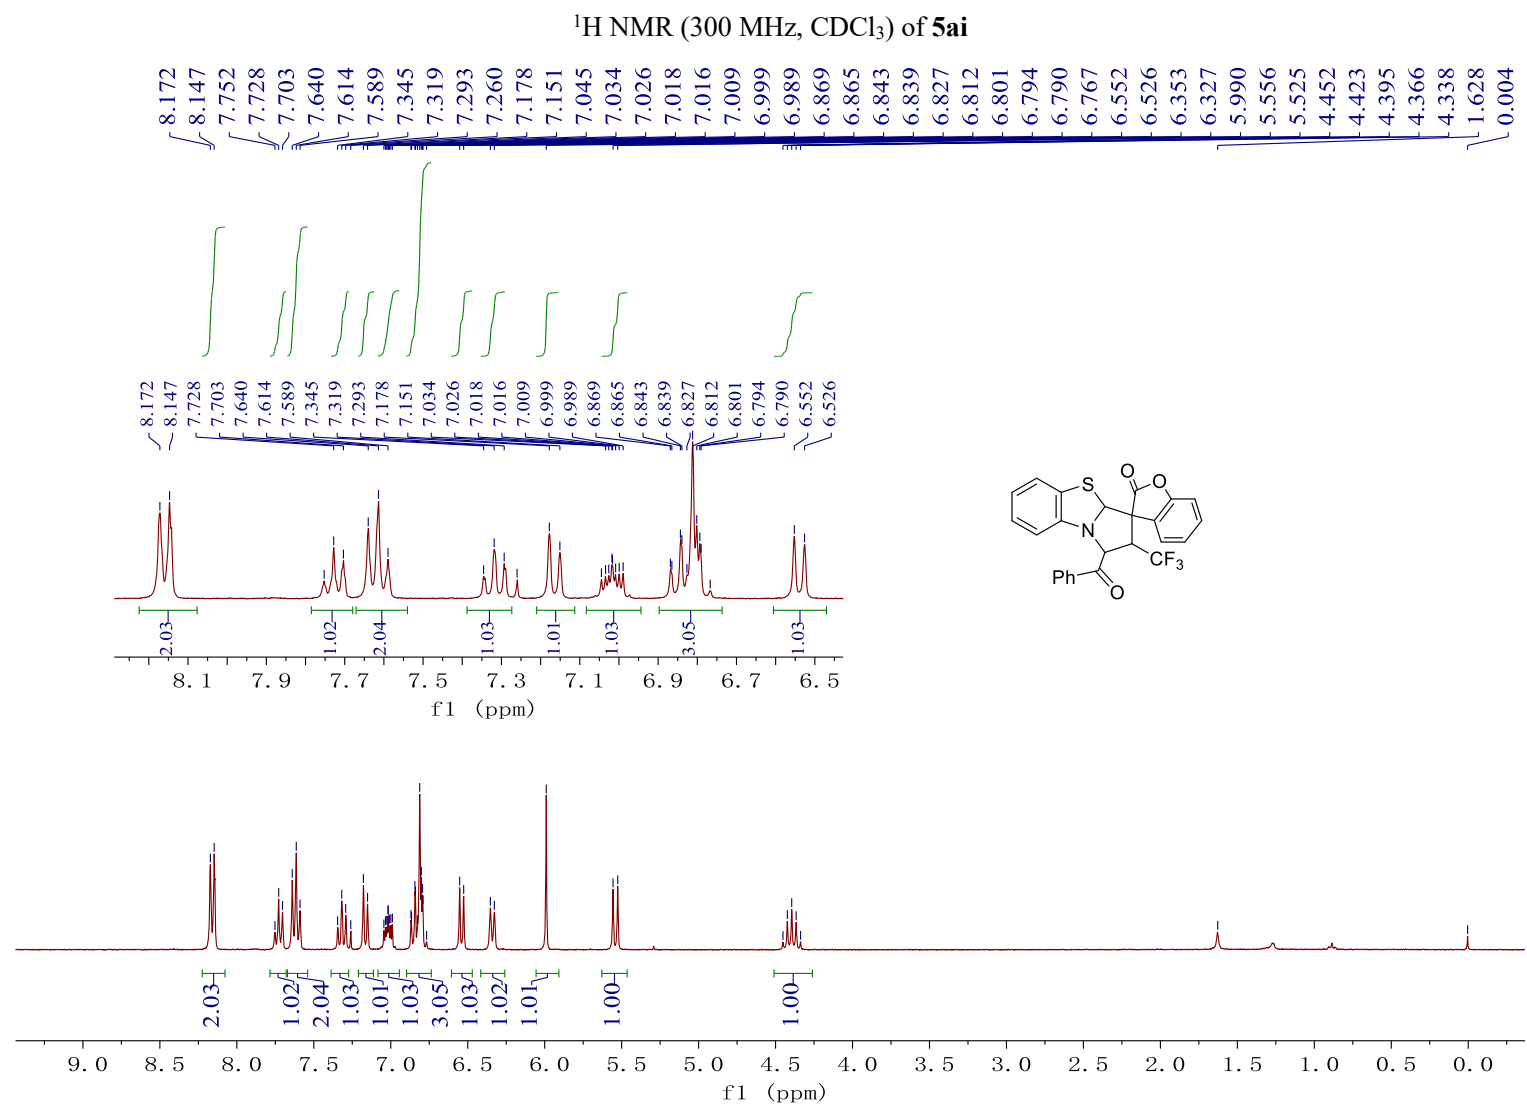

<sup>13</sup>C NMR (75 MHz, CDCl<sub>3</sub>) of **5ai**

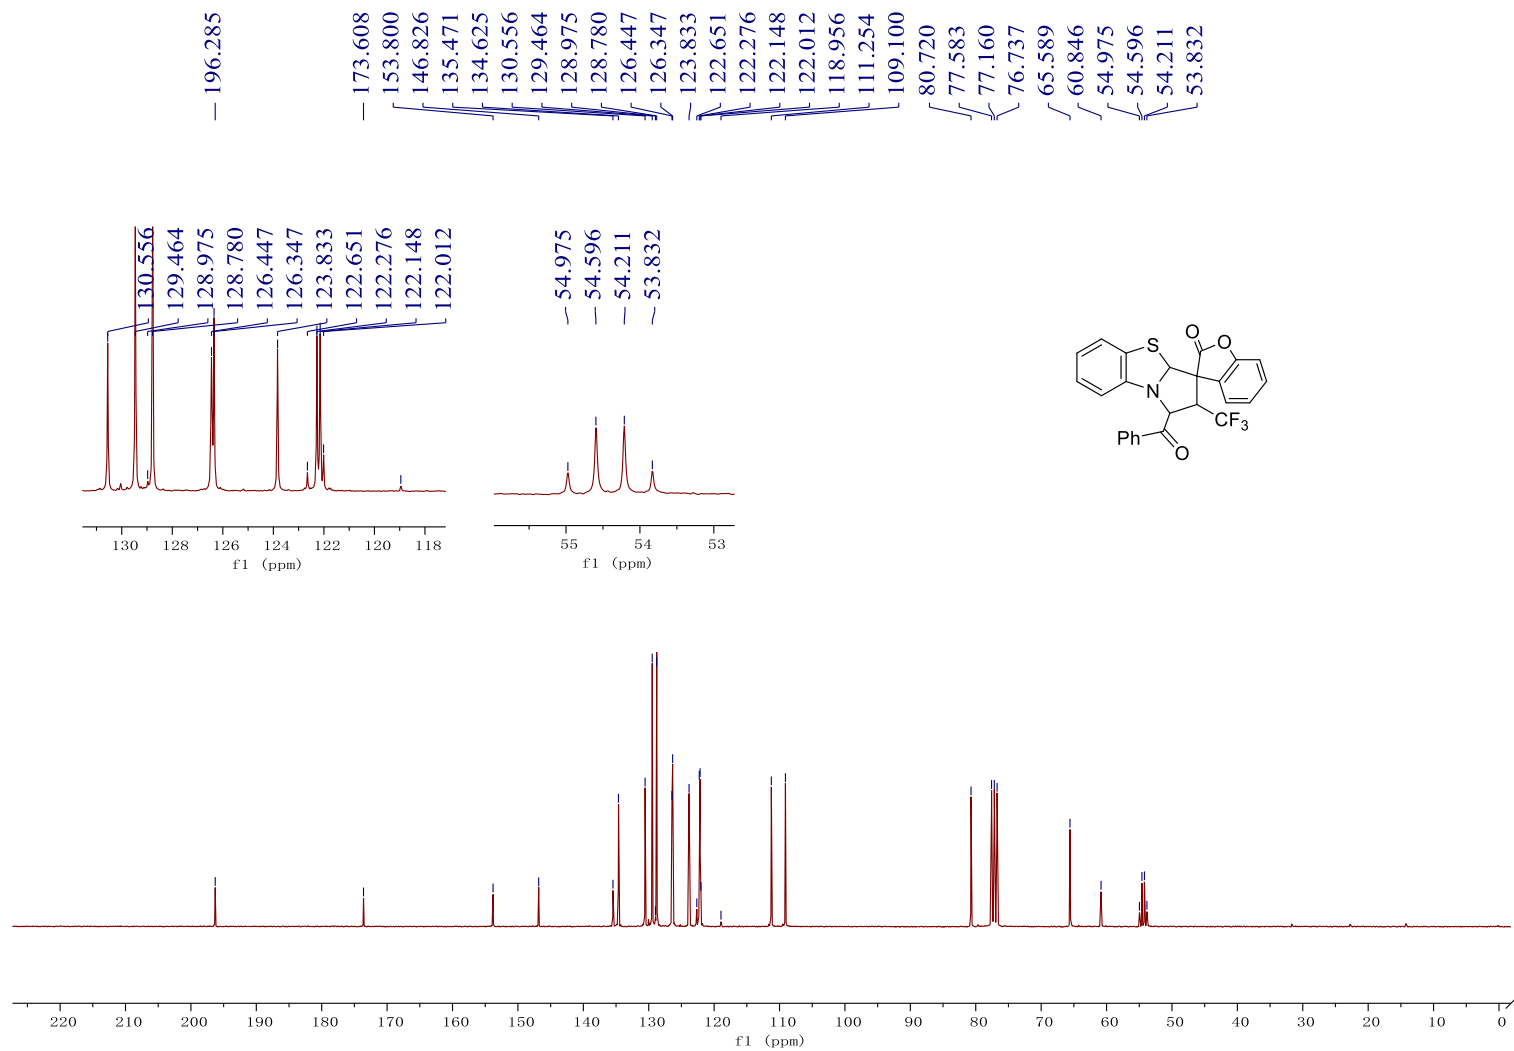

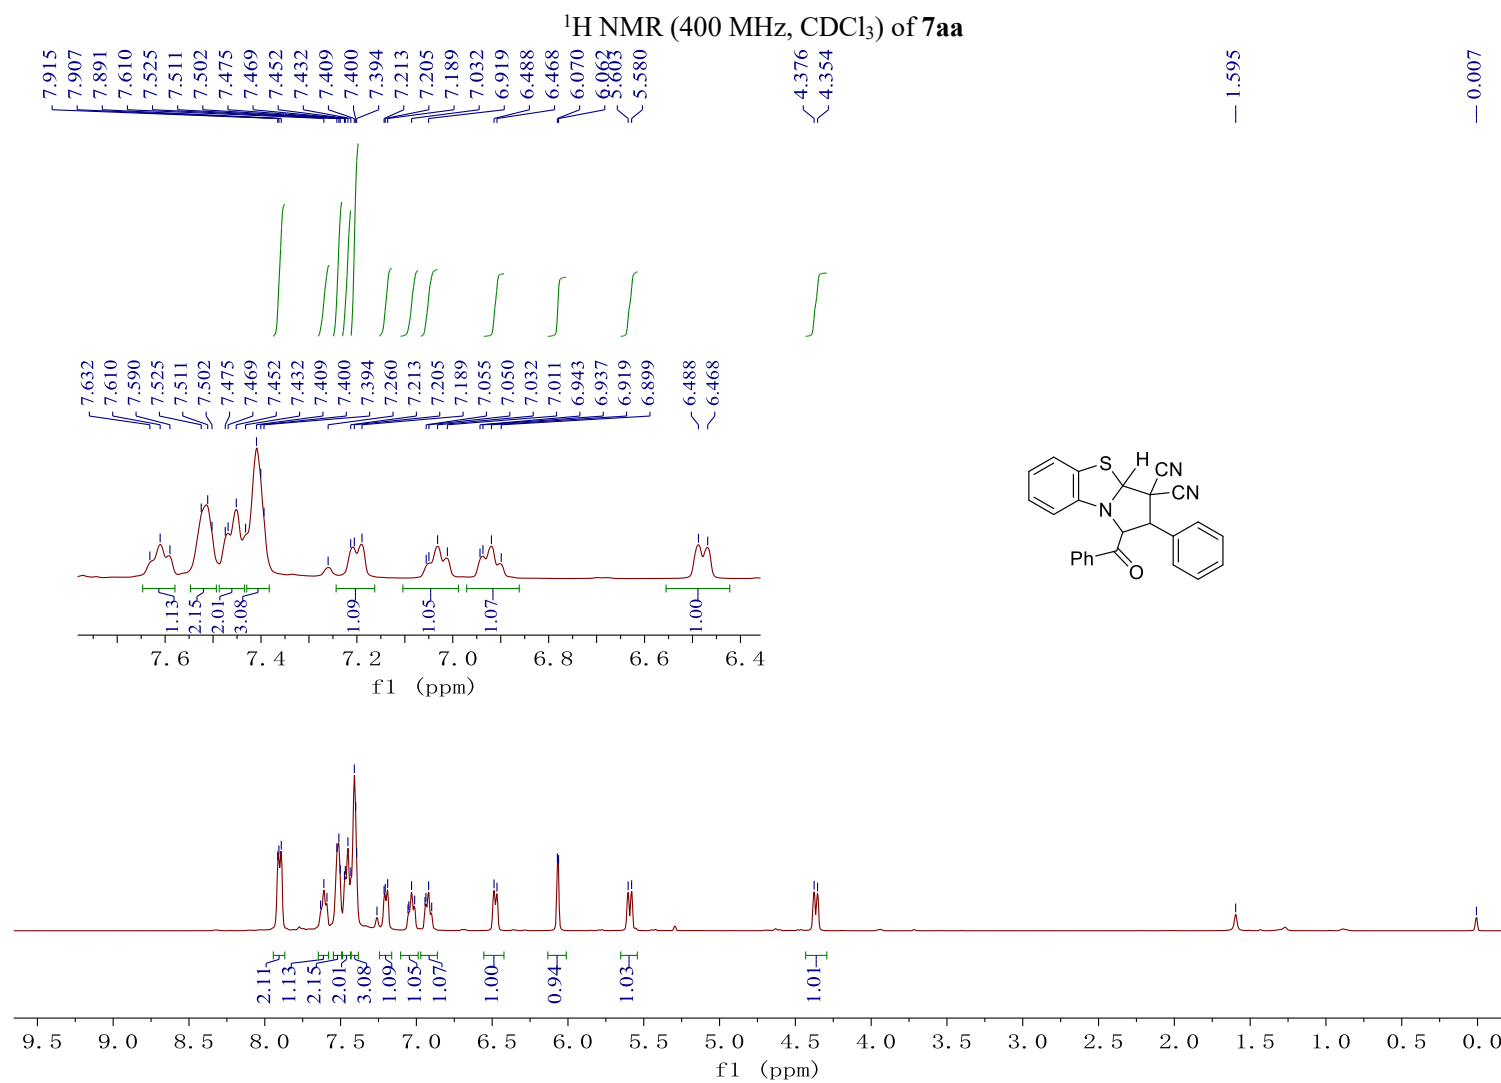

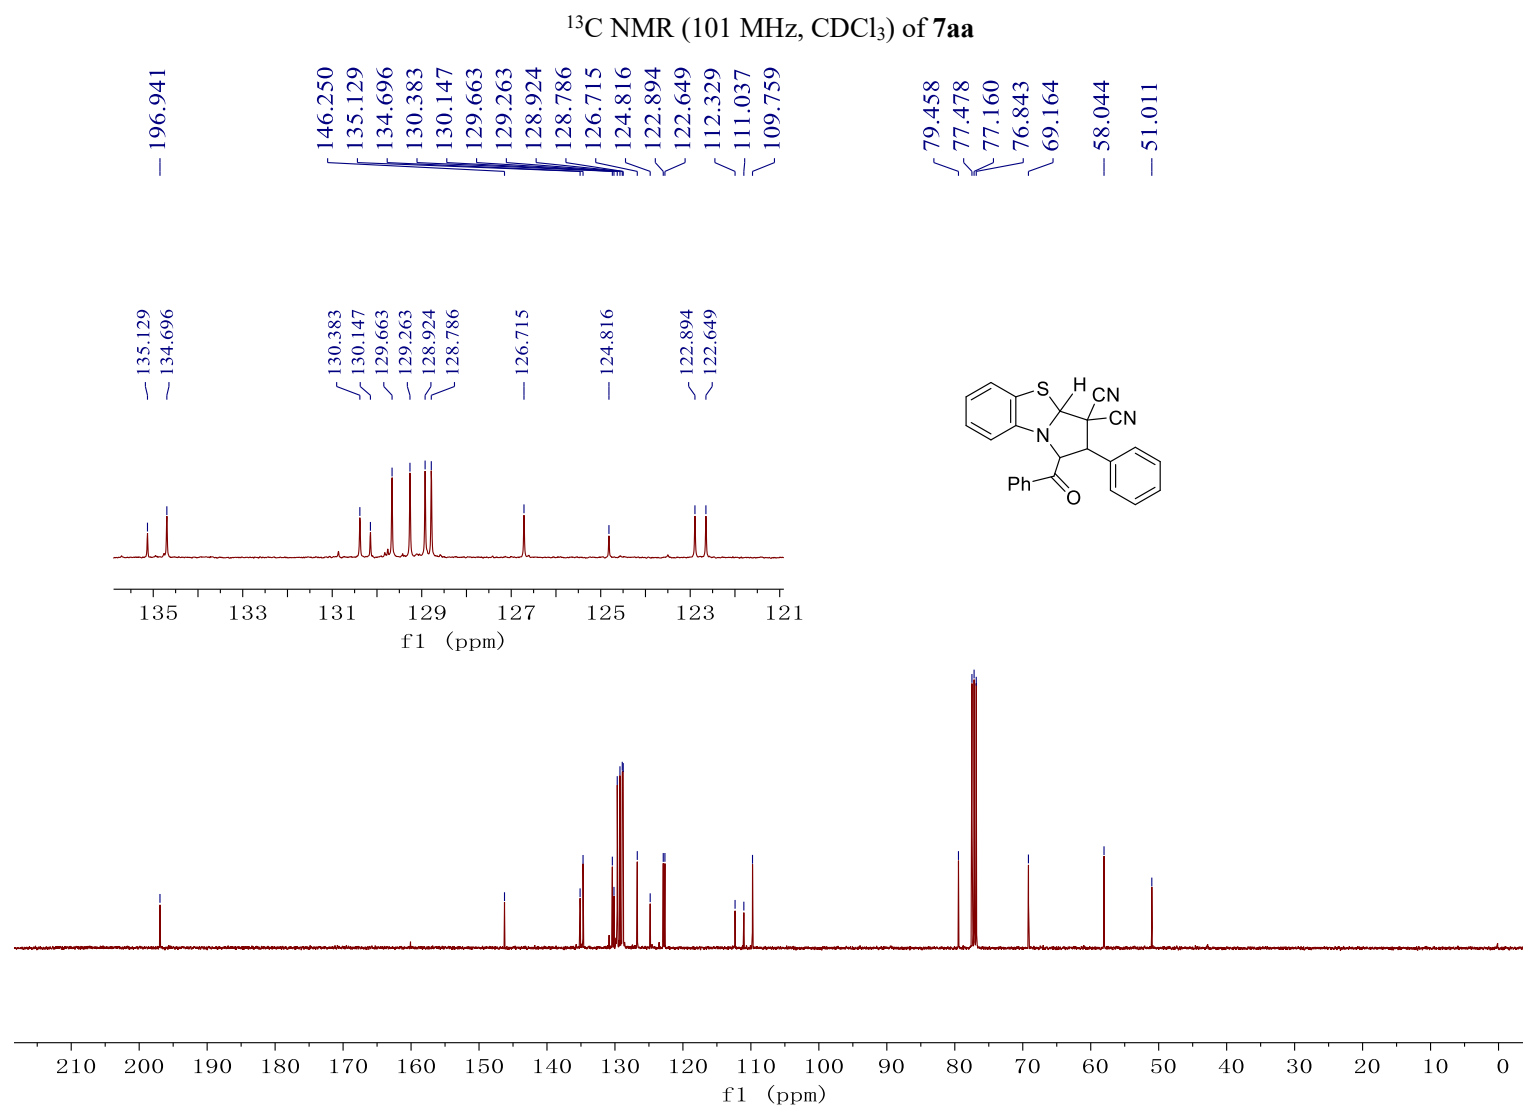

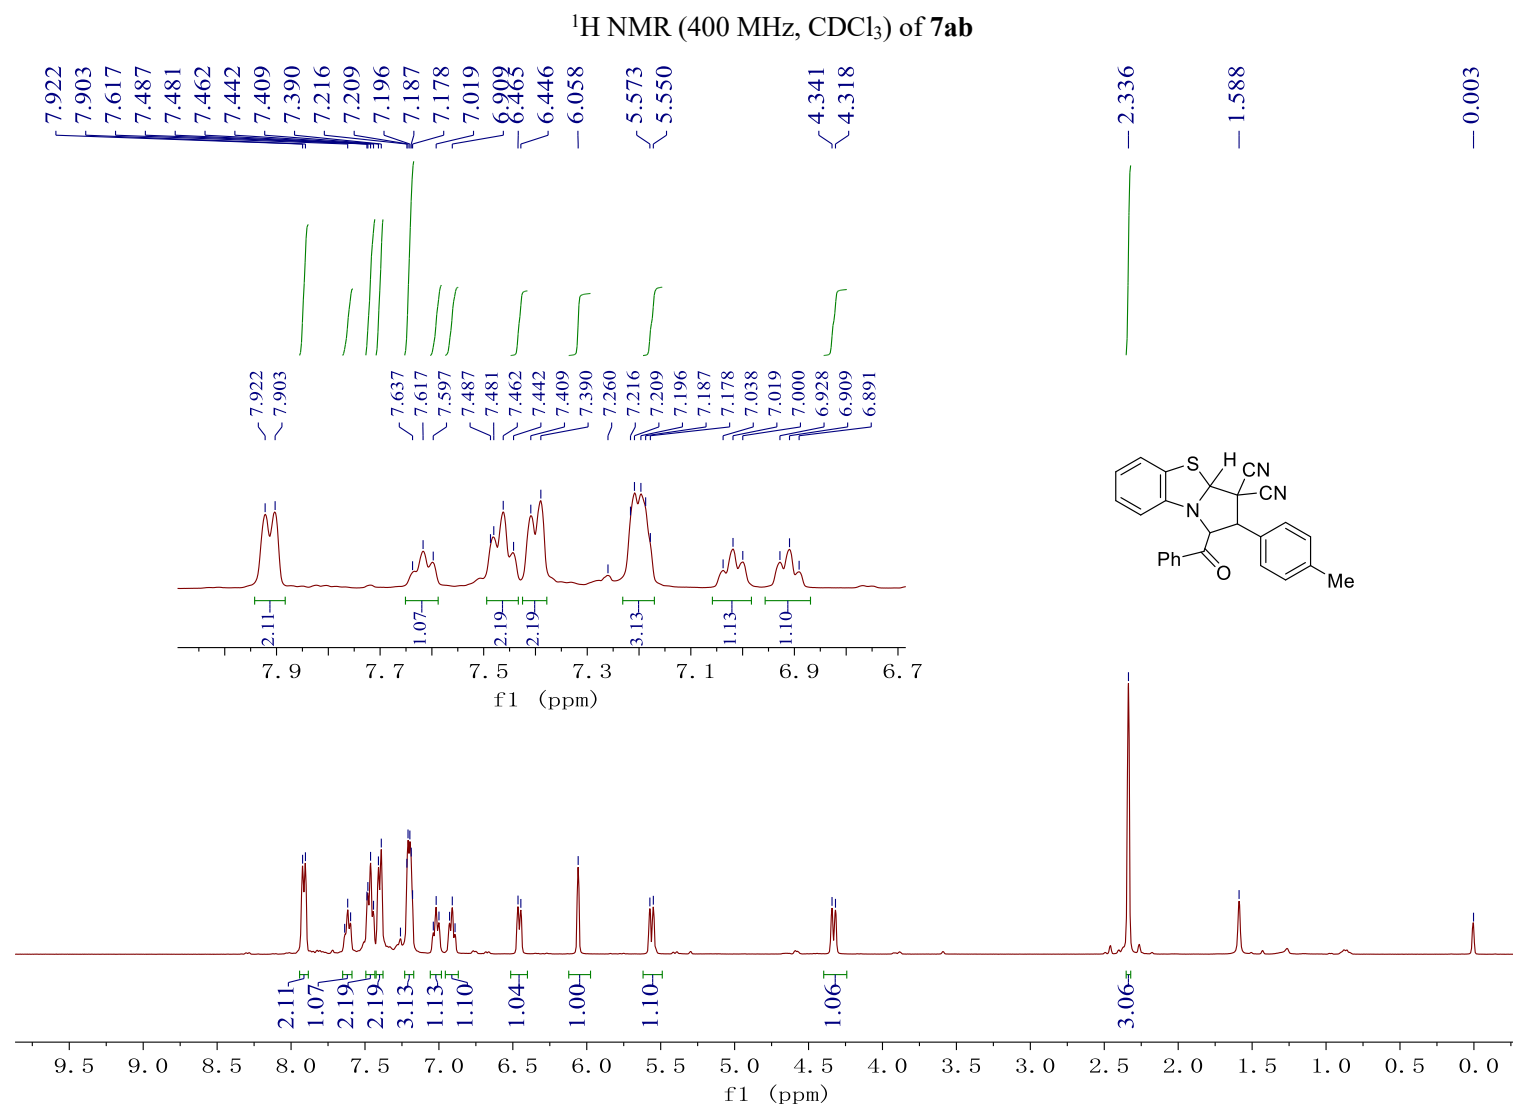

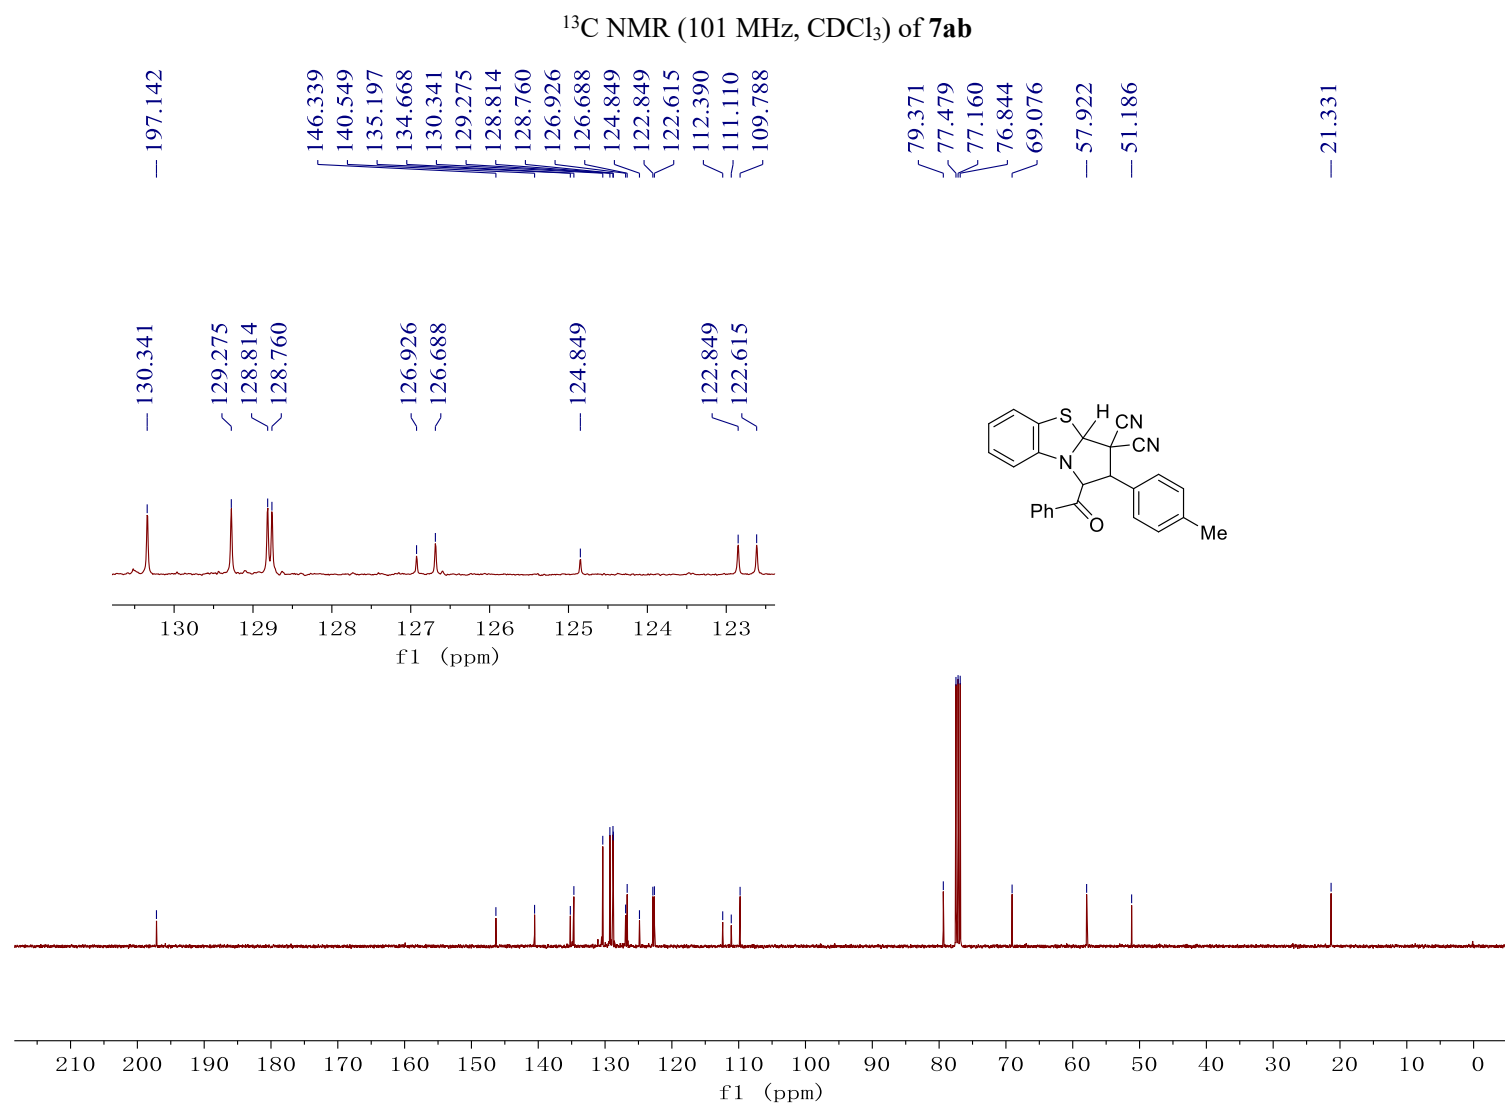



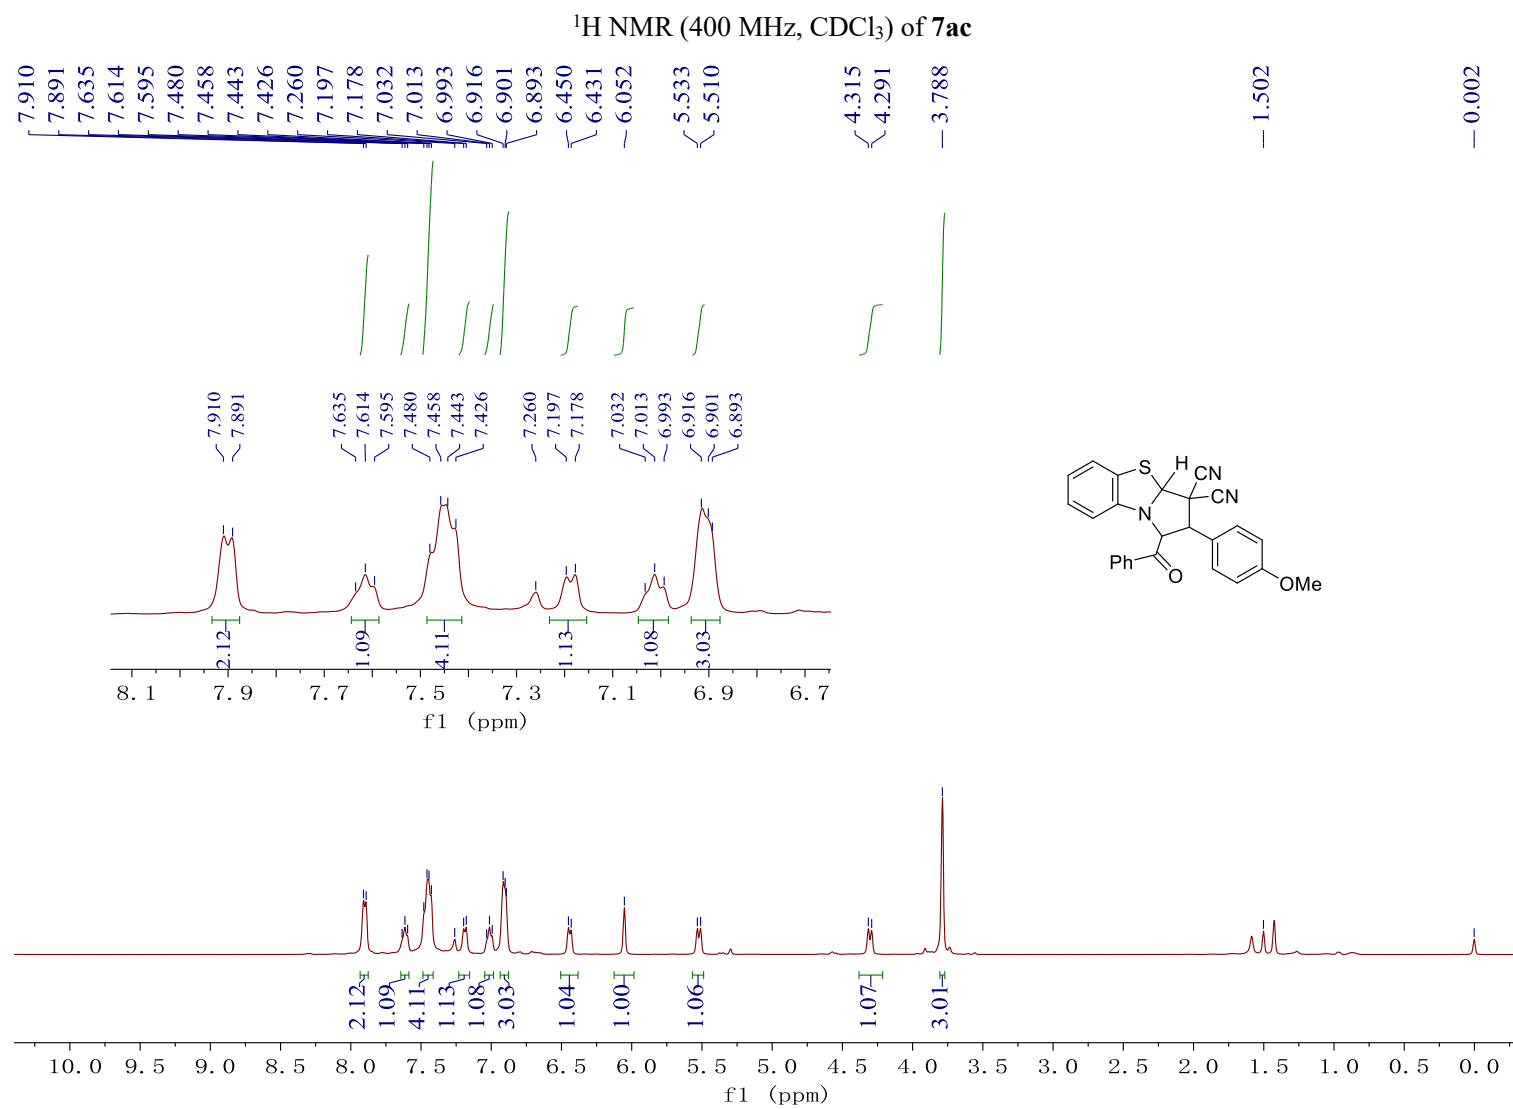

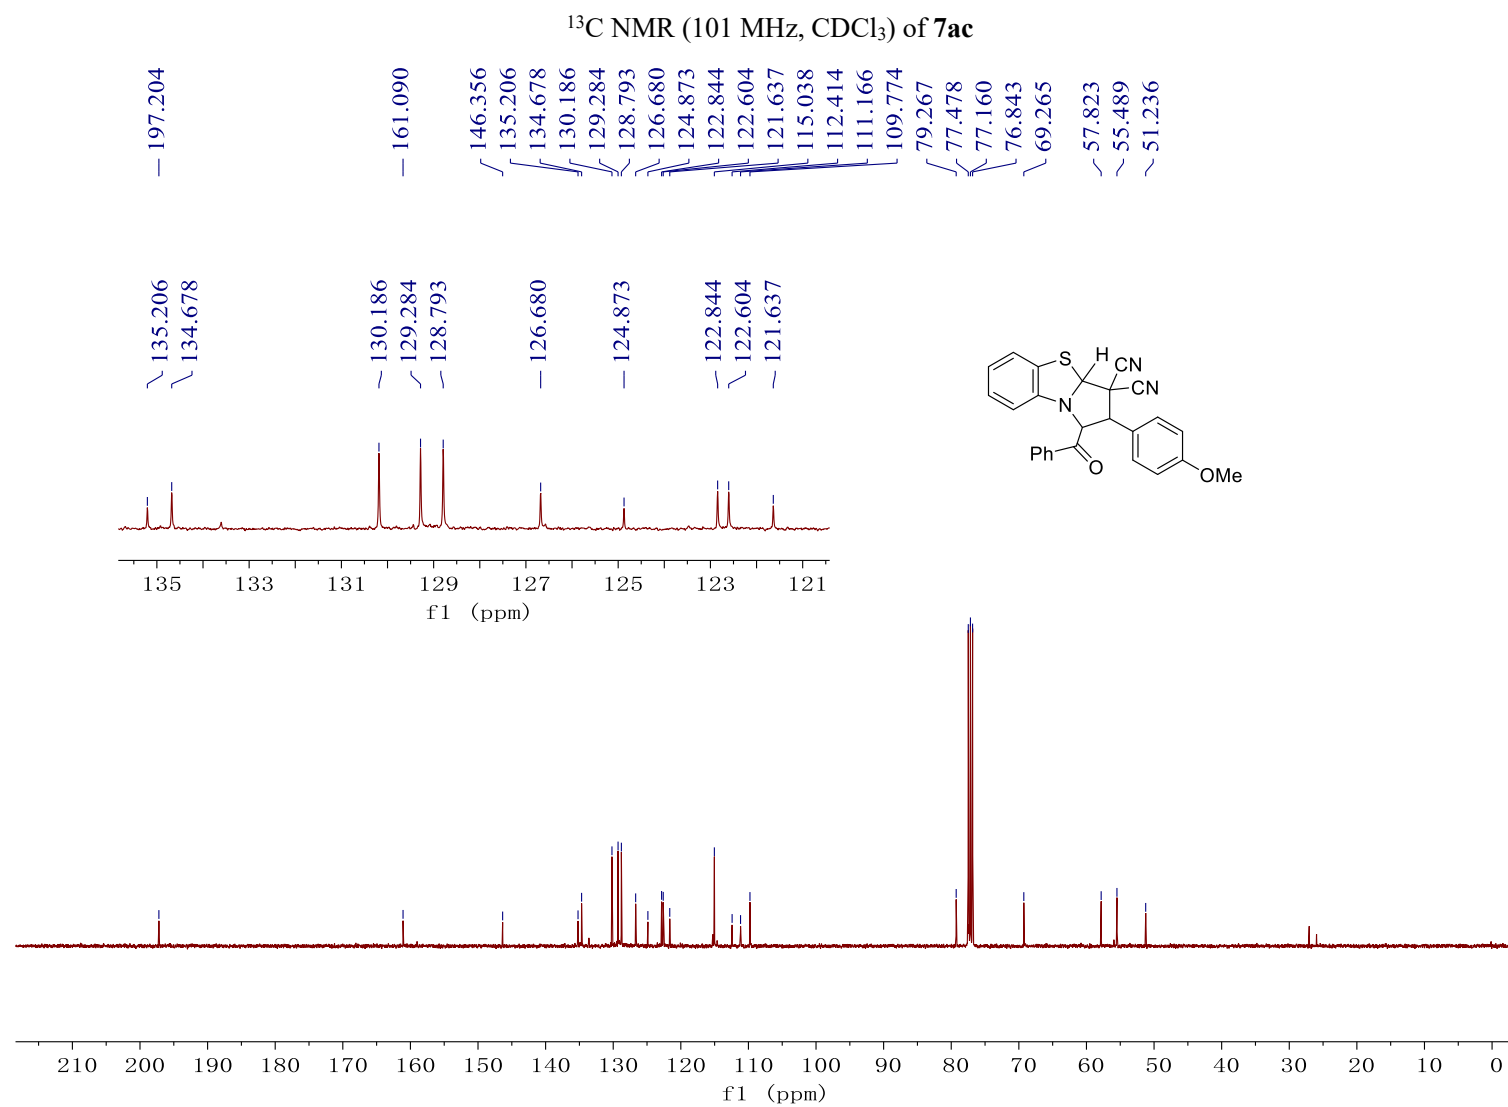

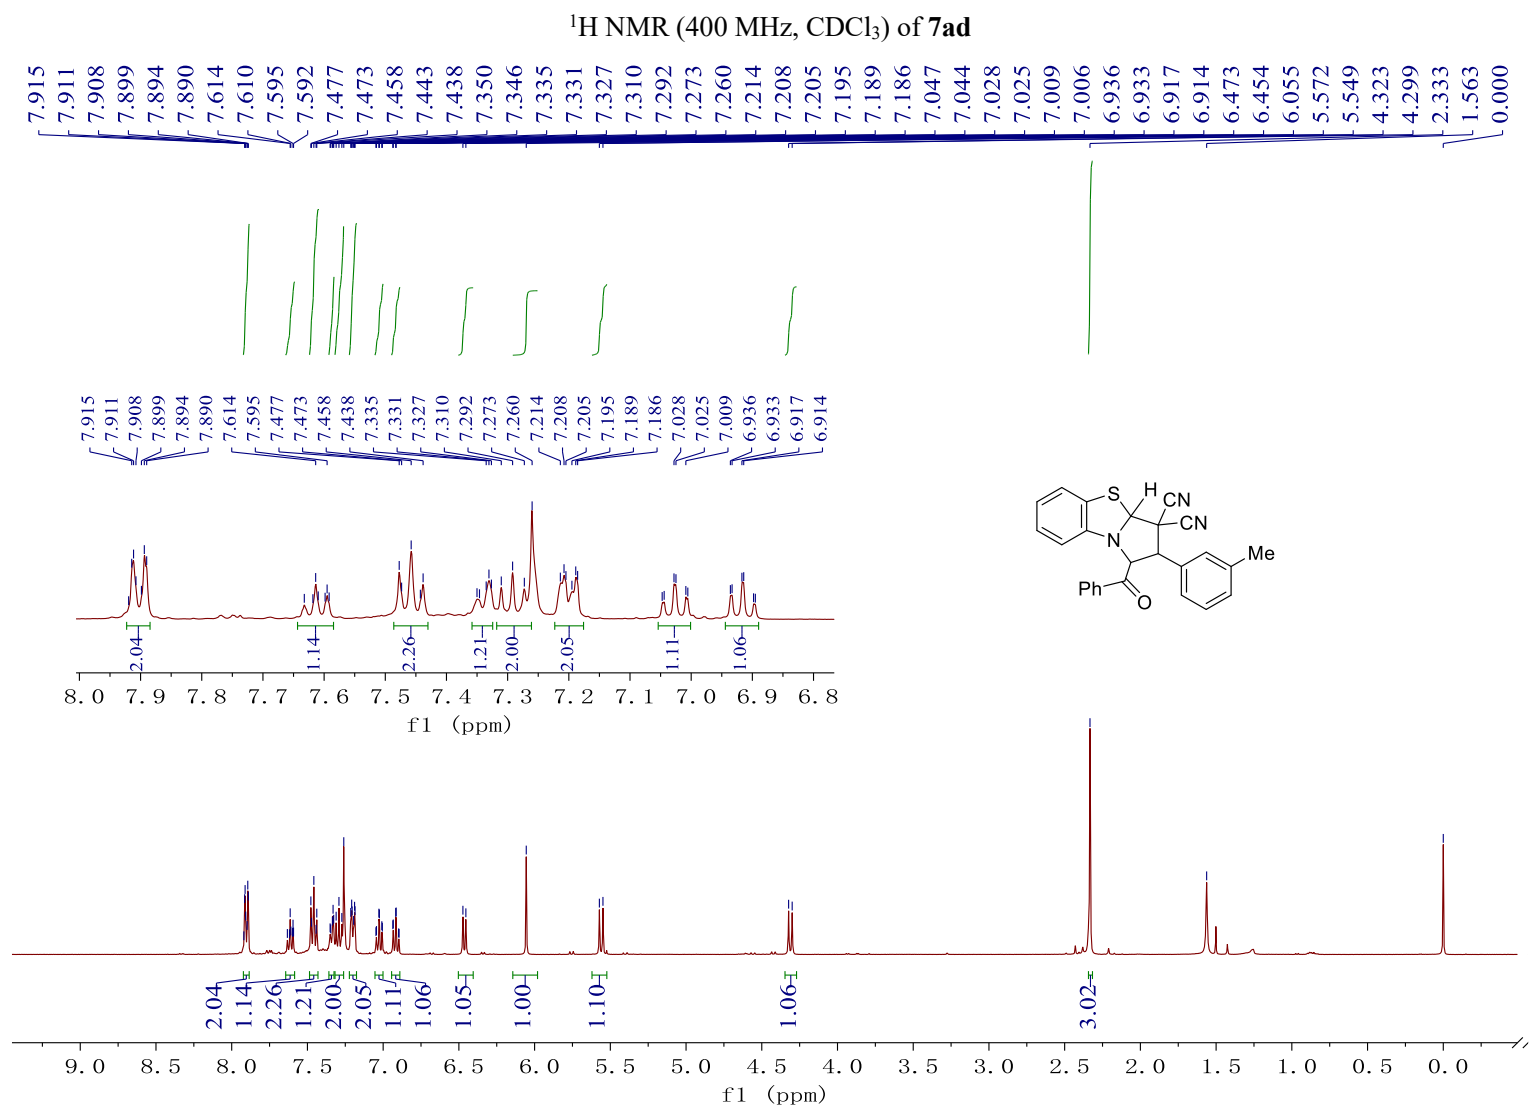

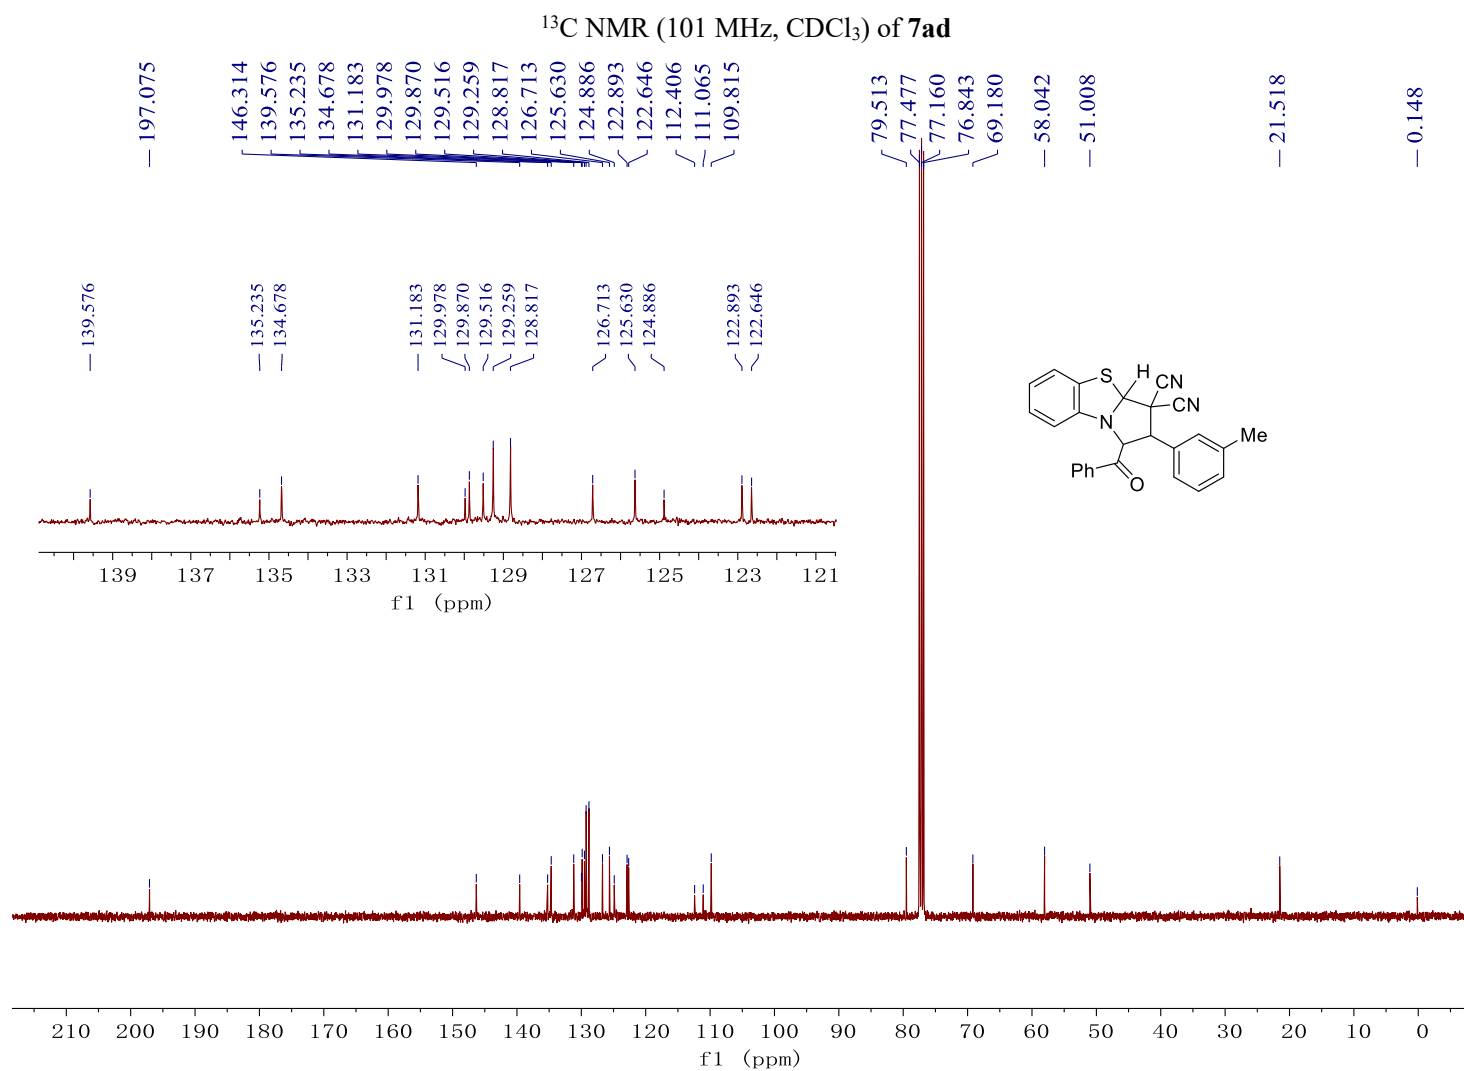

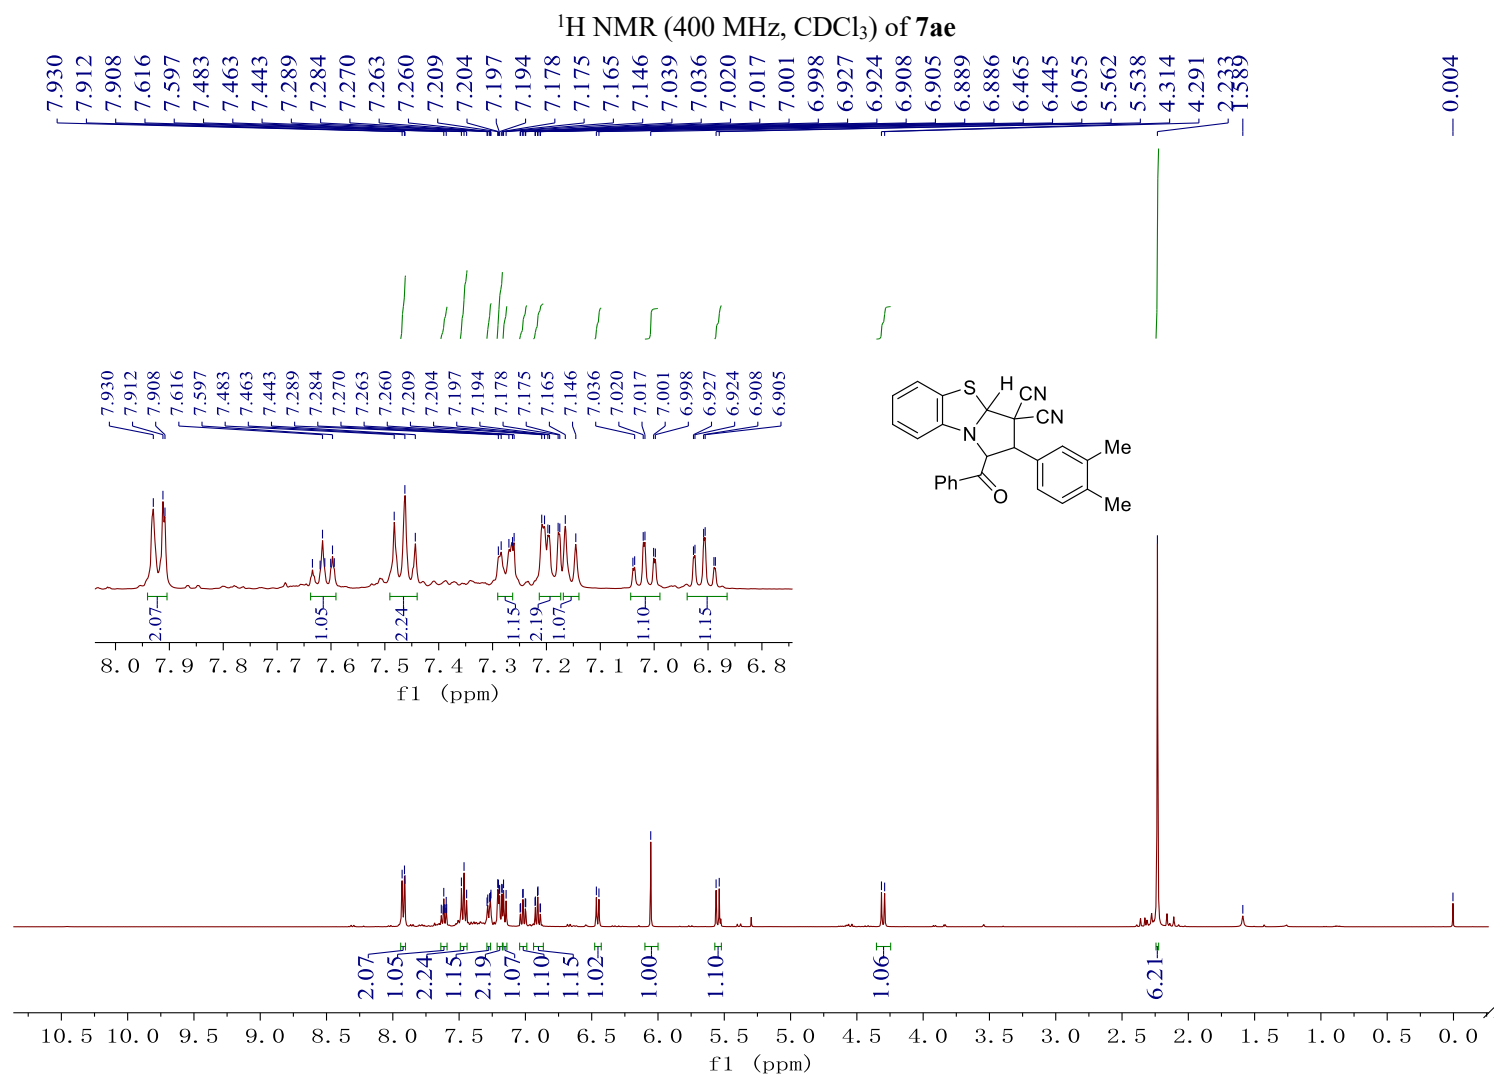

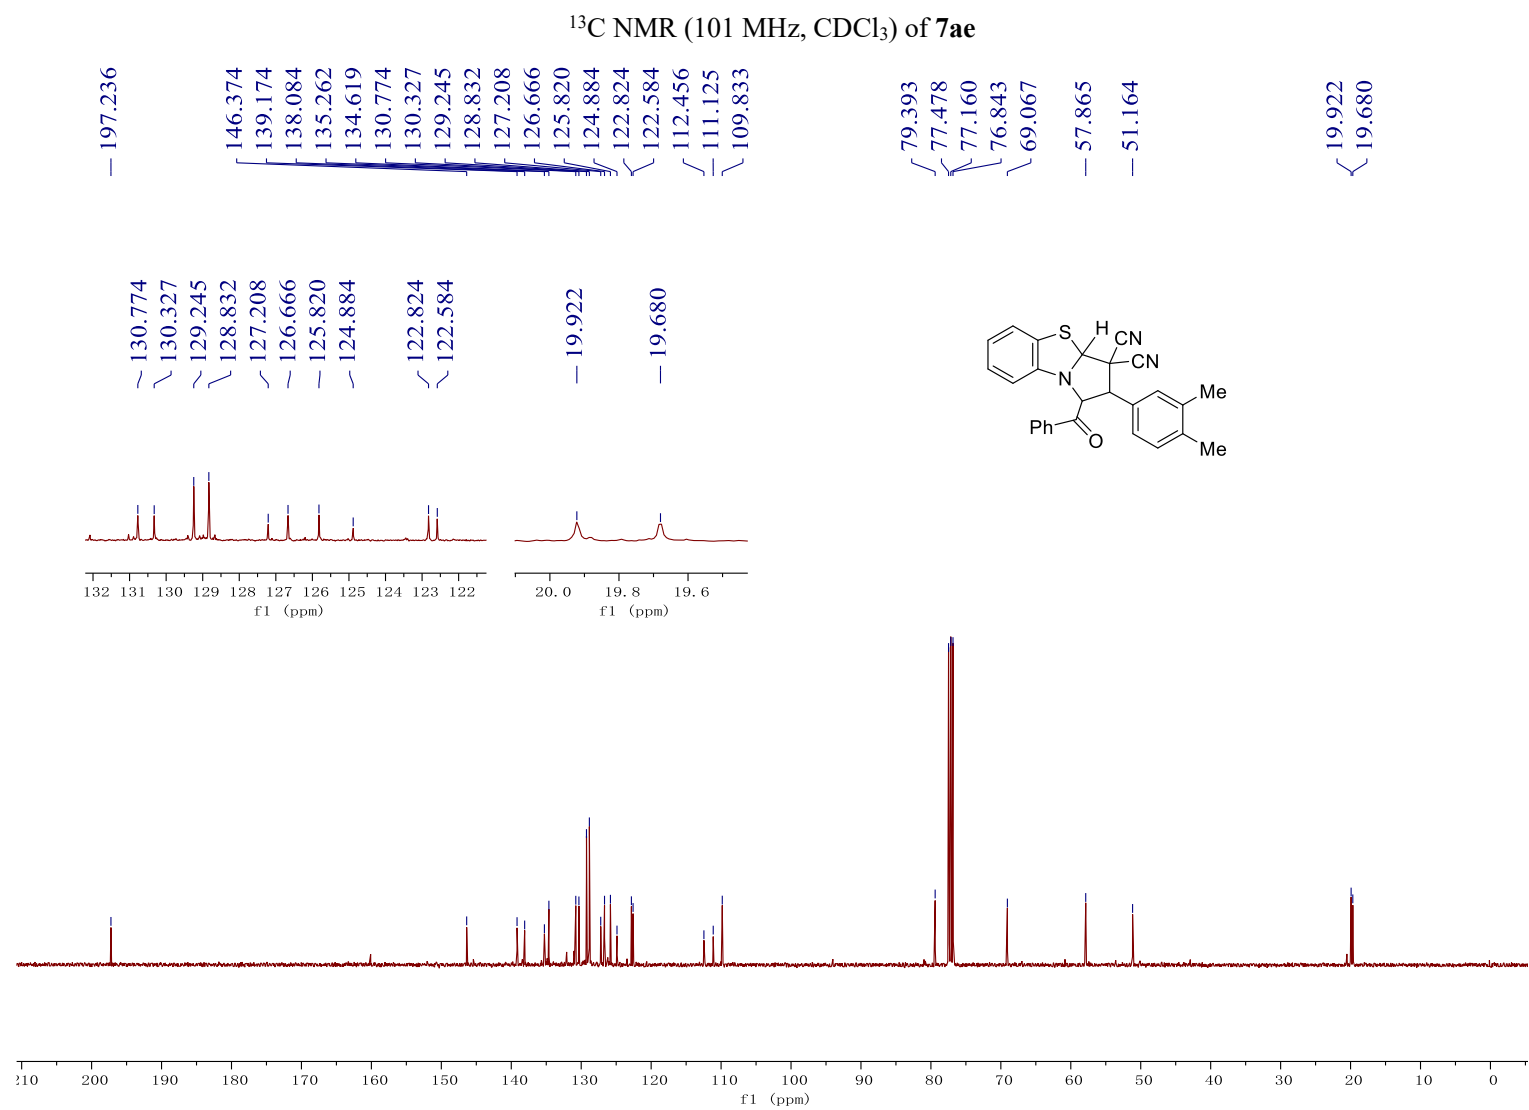

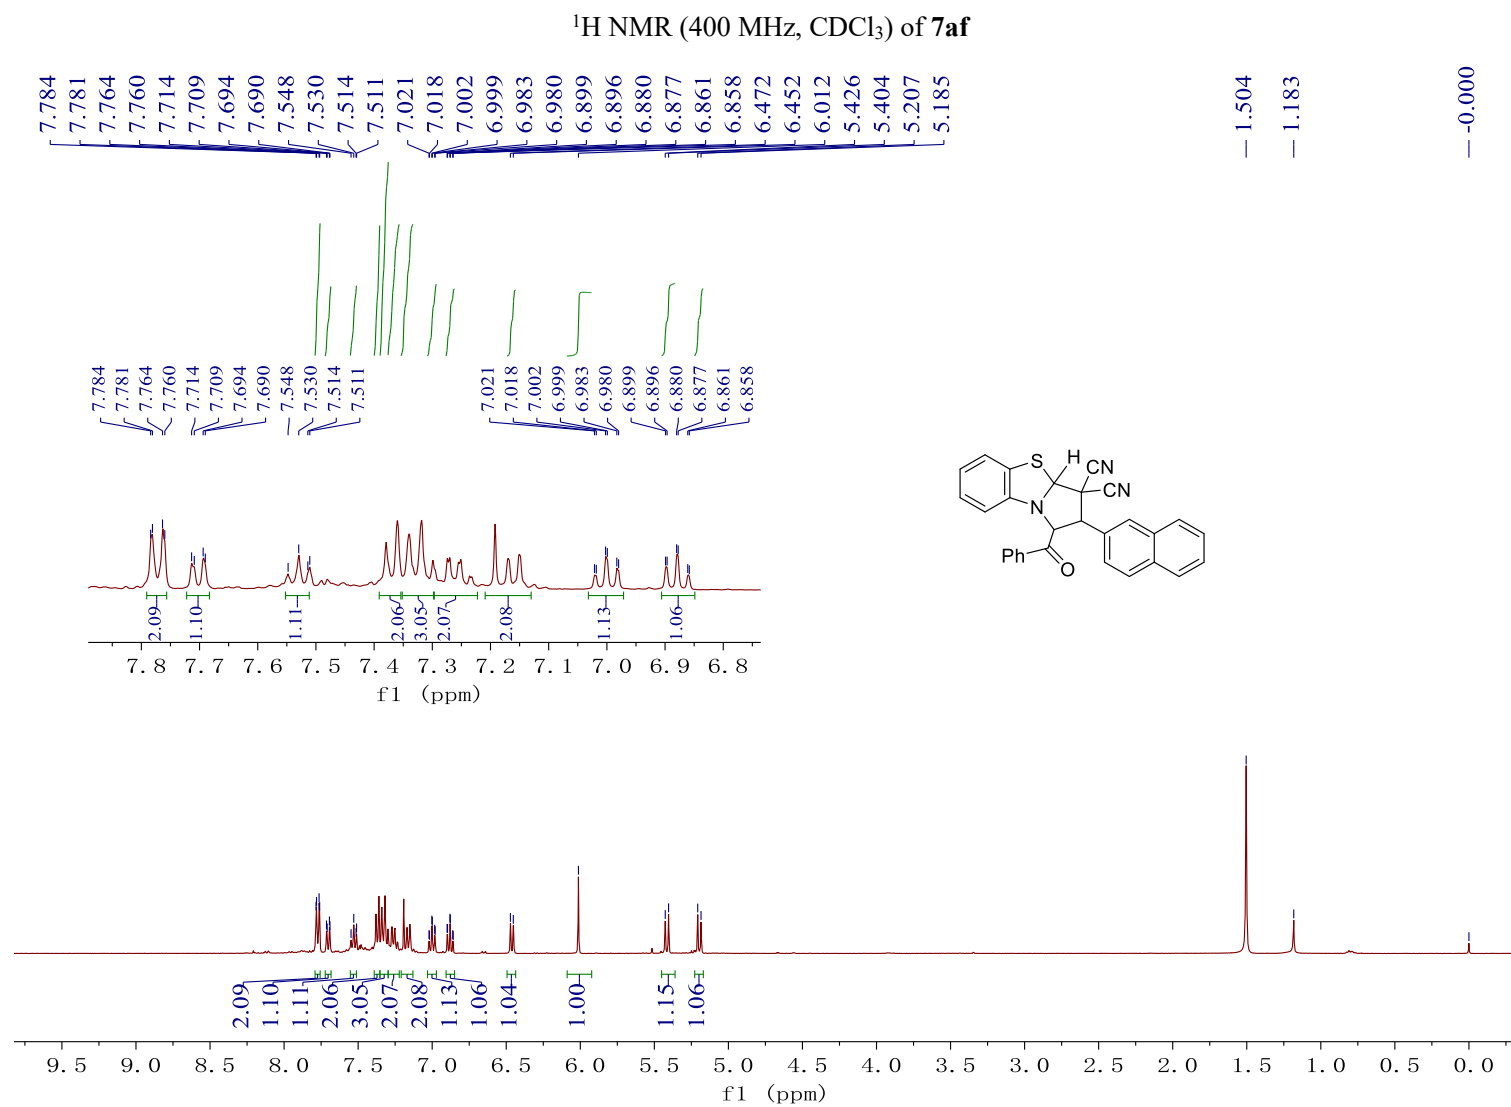

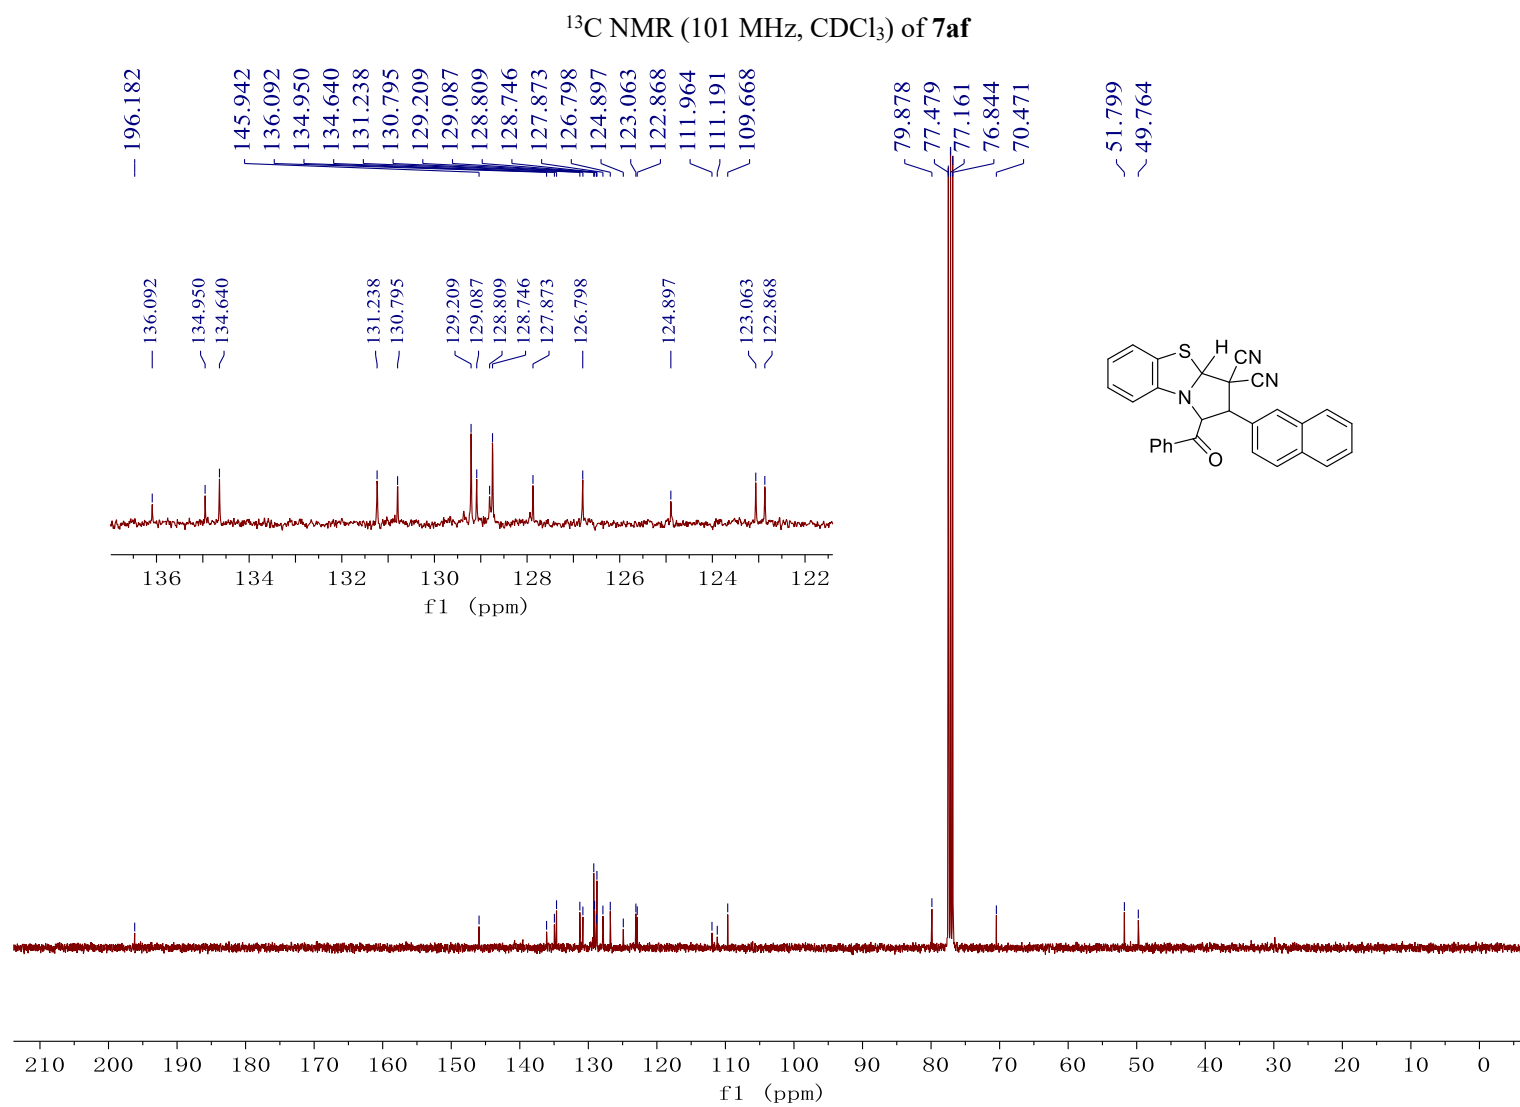

Supplement: s1 [file s1]
